# Supplementary material for: Direct oral anticoagulants in treatment of cerebral venous thrombosis: a systematic review
Source: PubMed Central journal article supplement — BMJ Open. 2021 Feb 16;11(2):e040212. doi: 10.1136/bmjopen-2020-040212 (PMC7888326; doi:10.1136/bmjopen-2020-040212), 2021-02-16
Supplement: bmjopen-2020-040212.draft_revisions.pdf [file bmjopen-2020-040212.draft_revisions.pdf]

# BMJ Open

BMJ Open is committed to open peer review. As part of this commitment we make the peer review history of every article we publish publicly available.

When an article is published we post the peer reviewers' comments and the authors' responses online. We also post the versions of the paper that were used during peer review. These are the versions that the peer review comments apply to.

The versions of the paper that follow are the versions that were submitted during the peer review process. They are not the versions of record or the final published versions. They should not be cited or distributed as the published version of this manuscript.

BMJ Open is an open access journal and the full, final, typeset and author-corrected version of record of the manuscript is available on our site with no access controls, subscription charges or pay-per-view fees (<http://bmjopen.bmj.com>).

If you have any questions on BMJ Open's open peer review process please email [info.bmjopen@bmj.com](mailto:info.bmjopen@bmj.com)

# BMJ Open

## Direct oral anticoagulants in treatment of cerebral venous thrombosis: systematic review

|                               |                                                                                                                                                                                                                                                                                                                                                                                                                                                                                                                                                                                                                                                                                      |
|-------------------------------|--------------------------------------------------------------------------------------------------------------------------------------------------------------------------------------------------------------------------------------------------------------------------------------------------------------------------------------------------------------------------------------------------------------------------------------------------------------------------------------------------------------------------------------------------------------------------------------------------------------------------------------------------------------------------------------|
| Journal:                      | <i>BMJ Open</i>                                                                                                                                                                                                                                                                                                                                                                                                                                                                                                                                                                                                                                                                      |
| Manuscript ID                 | bmjopen-2020-040212                                                                                                                                                                                                                                                                                                                                                                                                                                                                                                                                                                                                                                                                  |
| Article Type:                 | Original research                                                                                                                                                                                                                                                                                                                                                                                                                                                                                                                                                                                                                                                                    |
| Date Submitted by the Author: | 12-May-2020                                                                                                                                                                                                                                                                                                                                                                                                                                                                                                                                                                                                                                                                          |
| Complete List of Authors:     | Bose, Gauruv; University of Ottawa, Neurology<br>Graveline, Justin; University of Ottawa, Neurology<br>Yogendrakumar, Vignan; The Ottawa Hospital Research Institute, Neurology<br>Shorr , Risa; Ottawa Hospital<br>Fergusson, Dean; Ottawa Hospital Research Institute, Medicine<br>Le Gal, Gregoire; University of Ottawa, Hematology<br>Coutinho, Jonathan; University of Amsterdam, Department of Neurology<br>Mendonca, Marcelo; Centro Hospitalar de Lisboa Ocidental EPE, Neurology<br>Viana-Baptista, Miguel; Centro Hospitalar de Lisboa Ocidental EPE, Neurology<br>Nagel, Simon; University of Heidelberg, Neurology<br>Dowlathshahi, Dar; The Ottawa Hospital, Neurology |
| Keywords:                     | Stroke < NEUROLOGY, Stroke medicine < INTERNAL MEDICINE, Anticoagulation < HAEMATOLOGY, EPIDEMIOLOGY                                                                                                                                                                                                                                                                                                                                                                                                                                                                                                                                                                                 |
|                               |                                                                                                                                                                                                                                                                                                                                                                                                                                                                                                                                                                                                                                                                                      |

SCHOLARONE™  
Manuscripts

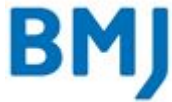

I, the Submitting Author has the right to grant and does grant on behalf of all authors of the Work (as defined in the below author licence), an exclusive licence and/or a non-exclusive licence for contributions from authors who are: i) UK Crown employees; ii) where BMJ has agreed a CC-BY licence shall apply, and/or iii) in accordance with the terms applicable for US Federal Government officers or employees acting as part of their official duties; on a worldwide, perpetual, irrevocable, royalty-free basis to BMJ Publishing Group Ltd ("BMJ") its licensees and where the relevant Journal is co-owned by BMJ to the co-owners of the Journal, to publish the Work in this journal and any other BMJ products and to exploit all rights, as set out in our [licence](#).

The Submitting Author accepts and understands that any supply made under these terms is made by BMJ to the Submitting Author unless you are acting as an employee on behalf of your employer or a postgraduate student of an affiliated institution which is paying any applicable article publishing charge ("APC") for Open Access articles. Where the Submitting Author wishes to make the Work available on an Open Access basis (and intends to pay the relevant APC), the terms of reuse of such Open Access shall be governed by a Creative Commons licence – details of these licences and which [Creative Commons](#) licence will apply to this Work are set out in our licence referred to above.

Other than as permitted in any relevant BMJ Author's Self Archiving Policies, I confirm this Work has not been accepted for publication elsewhere, is not being considered for publication elsewhere and does not duplicate material already published. I confirm all authors consent to publication of this Work and authorise the granting of this licence.

1  
2  
3  
4  
5  
6 Direct oral anticoagulants in treatment of cerebral venous thrombosis: systematic review

7 Gauruv Bose<sup>1</sup>, Justin Graveline<sup>1</sup>, Vignan Yogendrakumar<sup>1</sup>, Risa Shorr<sup>1</sup>, Dean Fergusson<sup>1</sup>,  
8 Gregoire Le Gal<sup>1</sup>, Jonathan M. Coutinho<sup>2</sup>, Marcelo Mendonça<sup>3</sup>, Miguel Viana-Baptista<sup>3</sup>, Simon  
9 Nagel<sup>4</sup>, and Dar Dowlatshahi<sup>1</sup>  
10  
11  
12  
13  
14  
15  
16

17 1. Department of Medicine, University of Ottawa and The Ottawa Hospital Research Institute,  
18 Ottawa, Canada  
19

20 2. Department of Neurology, University Medical Center, Amsterdam, Netherlands  
21

22 3. Department of Neurology, Centro Hospitalar de Lisboa Ocidental, Lisbon, Portugal  
23

24 4. Department of Neurology, University Hospital, University of Heidelberg, Heidelberg,  
25  
26  
27  
28  
29  
30  
31  
32  
33  
34  
35  
36  
37  
38  
39  
40  
41  
42  
43  
44  
45  
46  
47  
48  
49  
50  
51  
52  
53  
54  
55  
56  
57  
58  
59  
60

Germany

**Key words:** Direct-Acting Oral Anticoagulants, Intracranial thrombosis, Systematic review,  
Venous Brain Infarction, Venous Thrombosis

**Word count:** Abstract (273), Total Manuscript (3071)

Tables: 2, Figures: 1, Supplemental information: Yes

**Corresponding Author:** Gauruv Bose, MD.

Department of Medicine, Division of Neurology. University of Ottawa and The Ottawa Hospital  
Research Institute. 1053 Carling Avenue, Room C2196. Ottawa ON K1Y 4E9.

Email: [gbose@toh.ca](mailto:gbose@toh.ca)

## ABSTRACT

**Objectives** Cerebral venous thrombosis (CVT) can result in disability or death from venous infarct or intracranial hemorrhage. Anticoagulation improves outcomes, yet current guidelines do not recommend direct oral anticoagulants (DOAC) to treat CVT despite their benefits. We performed a systematic review to summarize published experience of DOAC therapy in CVT.

**Data sources** A systematic literature search of MEDLINE and EMBASE databases up to September 15, 2019 was conducted.

**Eligibility criteria** All published articles of patients with CVT treated with DOAC were included. Studies without follow-up information were excluded. Outcomes included safety and efficacy data.

**Data extraction and synthesis** Two independent reviewers screened articles and extracted data. A risk of bias analysis was performed.

**Primary and secondary outcome measures** Safety data included mortality, bleeding, or other DOAC related adverse events. Efficacy data included recanalization time and rates, disability by modified Rankin Scale (mRS), and discontinuation of DOAC therapy.

**Results** The search yielded 914 studies, with 22 meeting inclusion criteria. One randomized controlled trial, 2 retrospective cohorts, and 19 case series or studies contained 188 patients treated with DOAC for CVT. Ninety-three (49%) were treated with dabigatran, 85 (45%) with rivaroxaban, and 10 (5%) with apixaban, for 6 months median duration. DOAC was the initial treatment in 24 patients (12.7%). DOAC was discontinued in 9 (4.8%). One patient (0.5%) had worsening of their ICH and 3 (1.6%) had intestinal bleeding requiring intervention. Thirty-one patients (16%) had no recanalization, the median mRS was 0, with 8 patients (4%) having a score over 3, and 2 patients died (1%).

1  
2  
3 **Conclusion** The evidence for CVT is limited although suggests sufficient safety and efficacy  
4  
5 despite variability in timing and dose of treatment. This systematic review highlights that further  
6  
7 rigorous trials are needed to validate these findings and determine optimal treatment regimen.  
8  
9

10  
11  
12 **PROSPERO ID:** CRD42017078398  
13  
14

### 15 16 17 **Article Summary**

#### 18 19 **Strengths and limitations of the study**

20  
21 - Cerebral venous thrombosis is a relatively uncommon diagnosis and there is limited reported  
22  
23 use of direct oral anticoagulants.  
24  
25

26  
27  
28 - Real-world variability in timing, dosing, and follow-up of patients is highlighted in these  
29  
30 reported studies.  
31  
32

33  
34  
35 - Given the heterogeneity of the literature, a risk of bias analysis was performed.  
36  
37  
38  
39  
40  
41  
42  
43  
44  
45  
46  
47  
48  
49  
50  
51  
52  
53  
54  
55  
56  
57  
58  
59  
60

## INTRODUCTION

Cerebral venous thrombosis (CVT) requires rapid treatment to prevent neurologic disability or death due to venous infarct and hemorrhage. The estimated incidence is 1 per 100 000 per year with a mean age of onset 39 years.<sup>1</sup> Although the mortality rate has reduced to 5-15% due to advances in detection and treatment, morbidity rates can reach as high as 20-30%.<sup>2</sup> A Cochrane review in 2011 showed anticoagulation to be safe in CVT and was associated with a reduction in death prompting international guidelines to recommend acute treatment of CVT with either unfractionated heparin (UFH) or low-molecular-weight heparin (LMWH).<sup>3-6</sup> Longer term anticoagulation is required since recurrent venous thromboembolism (VTE) is highest within the first year of CVT.<sup>7</sup> Thus, at least 3 months of ongoing anticoagulation in low risk patients and indefinitely for unprovoked, high risk patients, or those with malignancy, is recommended as standard practice.<sup>6,8</sup> The transition from acute treatment of CVT with LMWH or UFH to an oral anticoagulant, such as warfarin, is standard practice despite no RCT comparing warfarin with UFH or LMWH.

Direct oral anticoagulants (DOAC) were introduced to treat symptomatic VTE over the past 10 years and have advantages over warfarin: more predictable pharmacokinetics, no international normalized ratio (INR) monitoring requirement or daily dose adjustments, yet have similar efficacy in treatment of acute VTE and lower rates of intracerebral hemorrhage (ICH).<sup>9</sup> Guideline recommendations, however, do not support DOAC treatment for CVT given the paucity of evidence.<sup>6</sup> There has been recent larger studies on

1  
2  
3 CVT treatment with DOAC, thus assessment of the appropriateness of these  
4  
5 anticoagulants for the treatment of CVT is warranted.<sup>10</sup>  
6  
7  
8  
9

10 The objective of this study was to review all available evidence to assess data on safety  
11  
12 and efficacy of direct oral anticoagulants in the treatment of CVT.  
13  
14  
15

## 16 17 **METHODS**

### 18 19 **Search Strategy and Selection Criteria**

20  
21 The protocol for this systematic review was registered (PROSPERO ID:  
22  
23 CRD42017078398)<sup>11</sup> and published<sup>12</sup>, following the PRISMA-P<sup>13</sup> and PRISMA<sup>14</sup>  
24  
25 guidelines where applicable, and is available in the supplement. The search strategy was  
26  
27 iteratively developed with assistance of a research librarian (RS) and is available in the  
28  
29 supplementary information (Appendix I). We searched Ovid MEDLINE, Epub Ahead of  
30  
31 Print, In-Process & Other Non-Indexed Citations, Ovid MEDLINE(R) Daily and Ovid  
32  
33 MEDLINE(R), EMBASE, Web of Science, and the Cochrane Central Register of  
34  
35 Controlled Trials for original reports of patients with a diagnosis of CVT treated with a  
36  
37 DOAC up to September 12, 2019. Given the expected low yield we included all available  
38  
39 studies including RCT, prospective or retrospective cohorts, case series and case reports.  
40  
41 Studies without follow-up data were excluded. Two authors (GB, JG) independently  
42  
43 reviewed titles and abstracts for inclusion.  
44  
45  
46  
47  
48  
49  
50

### 51 **Data items**

52  
53  
54  
55  
56  
57  
58  
59  
60



1  
2  
3 Type of study and number of patients were collected. Patient characteristic data included  
4 age, sex, and medical history. CVT diagnostic information included imaging modality,  
5 location of venous thrombosis, and other imaging findings such as edema or intracranial  
6 hemorrhage. Intervention data included type of DOAC therapy, dosage, initiation of  
7 DOAC after immediate therapy, and length of treatment. Outcome data were categorized  
8 into safety and efficacy data. Safety data included mortality, occurrence of intracranial  
9 and extracranial bleeding as defined by authors, and any other reported adverse events.  
10 The efficacy data extracted included recanalization time and rates, disability by the initial  
11 and final modified Rankin Scale (mRS), and the need to discontinue DOAC therapy.  
12 When applicable, authors were contacted for further data.  
13  
14  
15  
16  
17  
18  
19  
20  
21  
22  
23  
24  
25  
26  
27  
28

### 29 **Risk of bias analysis**

30 We used the Cochrane Risk of Bias Tool for randomized trials<sup>15</sup>; for observational  
31 cohorts, the Newcastle Ottawa Scale was used<sup>16</sup>; and for case reports and case series the  
32 appropriate Joanna Briggs Institute (JBI) Critical Appraisal Checklist was used.<sup>17</sup>  
33  
34  
35  
36  
37  
38  
39

### 40 **Statistical analysis**

41 Data was reported as counts and proportions for dichotomous data, medians and inter-  
42 quartile ranges (IQR) for non-normally distributed continuous data, or means with  
43 standard deviation (SD) for normally distributed continuous data.  
44  
45  
46  
47  
48  
49  
50

### 51 **Patient and public involvement**

52 No individual patient involvement.  
53  
54  
55  
56  
57  
58  
59  
60

## RESULTS

Of 914 titles, 22 studies met inclusion criteria (Figure 1) reporting a total of 188 patients with CVT treated with a DOAC (Table 1).<sup>18,19,28–37,20,38,39,21–27</sup> There was one RCT consisting of 60 patients treated with dabigatran compared to 60 patients treated with warfarin; 2 retrospective cohorts consisting of patients treated with rivaroxaban (n=48), dabigatran (n=9), and apixaban (n=1); 4 case series consisting of patients treated with rivaroxaban (n=28), dabigatran (n=18), and apixaban (n=5); and 15 case reports consisting of patients treated with rivaroxaban (n=9), dabigatran (n=6), and apixaban (n=4). The clinical characteristics and outcomes of the 188 patients are listed (Table 2).

### Dabigatran

A total of 93 patients (49%) were treated with dabigatran. There were 60 patients treated with dabigatran compared with 60 patients treated with warfarin reported in one multicenter open-label blinded end-point RCT by Ferro *et al.*<sup>18</sup> The patients were initially treated with LMWH or UFH for 5 -15 days, followed by dabigatran 150mg BID for 24 weeks. None of the patients treated with dabigatran had malignancy or inflammatory disorders. None of the patients died in the study. In total, 7 patients (11.7%) discontinued dabigatran: one due to worsening of their CVT-related baseline ICH, intestinal hematoma in another, and non-bleeding adverse events in the other 5. Of the 53 patients in DOAC group with follow-up data, 22 (41.5%) reportedly had no improvement of their CVT on repeat MRI. An mRS of 0 or 1 was reported in 54 (91.5%) patients, 4 (6.8%) had mRS of 2, and 1 patient (1.7%) had an mRS over 3. No patients had recurrent CVT or VTE.

1  
2  
3  
4  
5 Dabigatran was used in a case series of 15 patients reported by Mendonça *et al.* in  
6 addition to 3 patients with data that were acquired through contacting the authors.<sup>35</sup> These  
7 patients also were treated initially with UFH for a median 13 days followed by dabigatran  
8 for a median 6 months, 150mg BID in 16 patients (89%) and 110mg BID in 2 patients  
9 (11%). No deaths or new ICH was reported. One patient (6%) was switched from  
10 dabigatran to warfarin due to gastrointestinal complaints. One patient (6%) had a major  
11 intestinal bleed and one (6%) had minor intestinal bleed. There were 3 patients (17%)  
12 with no recanalization of their CVT. At 6 months, mRS of 0 or 1 was reported in 15  
13 patients (83%) and one (6%) had mRS of 3.  
14  
15  
16  
17  
18  
19  
20  
21  
22  
23  
24  
25  
26  
27

28 There were six patients treated with dabigatran in case reports. One patient had a new  
29 ICH due to development of a dural arteriovenous fistula (DAVF) despite a reportedly  
30 complete recanalization of their CVT.<sup>19</sup> One patient was initially treated with rivaroxaban  
31 and was then switched to dabigatran due to drug-drug interaction concerns given  
32 concurrent phenytoin use.<sup>25</sup> No patient had reported mortality. All 6 patients had an mRS  
33 of 0 or 1 after treatment.  
34  
35  
36  
37  
38  
39  
40  
41  
42  
43  
44

### 45 **Rivaroxaban**

46 A total of 85 patients (45%) were treated with rivaroxaban. Two retrospective cohorts,  
47 one by Wasay *et al.* and one by Herweh *et al.* reported a total of 48 patients treated with  
48 either 15mg BiD or 20mg daily rivaroxaban, 9 with dabigatran, and 1 with apixaban 5mg  
49 BiD, as well as 149 treated with warfarin and 3 with LMWH.<sup>22,32</sup> In the cohort by Wasay  
50  
51  
52  
53  
54  
55  
56  
57  
58  
59  
60

1  
2  
3 *et al*, patients received 15-20mg of rivaroxaban and 2 (4.4%) died: one prior to discharge  
4 (2%) and one prior to 6-month follow-up (3%), compared to the warfarin group where 4  
5 patients died (6%), 3 prior to discharge (5%), and 1 prior to 6-month follow-up (2%). The  
6 cause of death was not reported. No patient died in Herweh's cohort. No patients  
7 discontinued their therapy in either group. At follow-up, mRS was 0 or 1 in 25 patients  
8 (64%) in the cohort by Wasay *et al*, and 12 patients (92%) in the cohort from Herweh *et*  
9 *al*. More patients in the observational cohort by Wasay *et al*. had baseline ICH in the  
10 DOAC group compared with the warfarin group (55.6% vs 30.3%,  $p=0.01$ ). The cohort  
11 by Herweh *et al*. suggested anticoagulation choice did not predict recanalization, rather  
12 site of thrombosis, specifically the superior-sagittal-sinus, was a predictor of successful  
13 recanalization on multivariate analysis (Odds ratio (OR) 16, 95% confidence interval (CI)  
14 2-138).

15  
16  
17  
18  
19  
20  
21  
22  
23  
24  
25  
26  
27  
28  
29  
30  
31  
32  
33 A case series by Shankar Iyer *et al.*, reported use of rivaroxaban in 20 stable patients  
34 without the need for surgical intervention.<sup>23</sup> There was no initial treatment with LMWH  
35 or UFH in this series before initiating rivaroxaban 15mg BiD for 3 weeks followed by  
36 20mg daily. At 6-month follow-up, no patient died or discontinued rivaroxaban. There  
37 was no ICH or adverse effects reported. There was recanalization of all patients. At 6-  
38 month follow-up, 19 patients (95%) reported mRS of 0 or 1, with only one patient (5%)  
39 having mRS of 2.

40  
41  
42  
43  
44  
45  
46  
47  
48  
49  
50  
51 A further 13 patients in case reports were treated with rivaroxaban. No mortality or new  
52 ICH was reported, and all had mRS of 0 or 1 at follow-up. The dosing of rivaroxaban was

1  
2  
3 variable. The majority of patients received 20mg daily, with a minority first being treated  
4  
5 with 15mg BID for 7 days. One patient was treated with a low dose of rivaroxaban 5mg  
6  
7 daily, in conjunction with PLEX for concurrent anti-NMDA receptor encephalitis, with  
8  
9 no recurrent thrombosis.<sup>28</sup> Another patient was treated with 10mg daily in conjunction  
10  
11 with azathioprine for Crohn's disease<sup>33</sup>, and one with 15 mg daily after initially being  
12  
13 treated with warfarin for 3 months and switched after a recurrent stroke and diagnosis of  
14  
15 anti-phospholipid antibody syndrome.<sup>37</sup>  
16  
17  
18  
19  
20

### 21 **Apixaban**

22  
23 Apixaban has been reported in 10 patients, one patient from the above cohort by Herweh  
24  
25 *et al.*, 5 in a case series by Covut *et al.* that also reported 4 patients treated with  
26  
27 rivaroxaban, as well as 4 additional case reports. In the series reported by Covut *et al.*, all  
28  
29 patients were initially treated with UFH and started on DOAC after a median 3 days,  
30  
31 continuing for a median of 12 months.<sup>20</sup> No patient died or had new ICH during the  
32  
33 follow-up, nor switched off their DOAC. One patient was switched onto apixaban due to  
34  
35 gastrointestinal bleeding while 15 days after starting warfarin and one was switched onto  
36  
37 rivaroxaban 30 days after starting warfarin due to INR fluctuations. There was no  
38  
39 recanalization in 3 patients (60%) treated with apixaban and in 1 patient (25%) treated  
40  
41 with rivaroxaban. The 6-month follow-up showed a good outcome of mRS 0 or 1 in 8  
42  
43 patients (89%), while one patient on apixaban had mRS of 4. The other case reports of  
44  
45 apixaban indicate that all 4 patients had mRS of 0-1 after treatment, with no mortality or  
46  
47 new ICH. Apixaban dosing was 5mg BiD for all patients, though one initially received  
48  
49  
50  
51  
52  
53  
54  
55  
56  
57  
58  
59  
60

1  
2  
3 10mg BiD for 7 days in a patient with T cell acute lymphoblastic leukemia treated with  
4  
5 pegylated asparaginase, a thrombogenic medication.<sup>31</sup>  
6  
7  
8  
9

### 10 **Risk of bias**

11  
12 The risks of bias analyses are available in the supplementary information (Appendix II).  
13  
14 The RCT had the lowest risk given utilization of a prospective randomized open blinded  
15  
16 end-point (PROBE) design. The two observational cohorts did not control for  
17  
18 confounders hence have inherent bias as per the Newcastle Ottawa Scale. The case series  
19  
20 and case reports are moderately biased based on JBI Critical Appraisal given lack of  
21  
22 reporting completeness.  
23  
24  
25  
26  
27

### 28 **DISCUSSION**

29  
30 We found that in nearly a decade since approval of DOAC for treatment of VTE, only  
31  
32 188 published patients have been treated with DOAC for CVT. The reported studies are  
33  
34 mostly case reports, two retrospective cohorts, and one randomized controlled trial.  
35  
36 Overall safety was reassuring, with one (0.5%) new ICH reported<sup>19</sup> and two (1%) patient  
37  
38 mortalities reported<sup>22</sup>, which is comparable to the expected overall mortality of treated  
39  
40 CVT.<sup>2</sup> Efficacy is also promising with 80% of cases reporting an mRS of 0 or 1.  
41  
42  
43  
44  
45

46  
47 The most reported DOAC was dabigatran, used to treat 93 patients (49%). Most of these  
48  
49 patients (65%) were enrolled in a recent RCT that showed similar safety and efficacy  
50  
51 compared with warfarin at 6 months with 60% recanalization rate and median mRS of 0  
52  
53 or 1.<sup>18</sup> While dabigatran has the availability of a monoclonal antibody reversal agent, its  
54  
55  
56  
57  
58  
59  
60

1  
2  
3 use was not reported in any patient. Rivaroxaban was second-most reported in 85 patients  
4 (45%), none of whom were in an RCT. The fact that nearly half of all reported DOAC  
5  
6 treated CVT had rivaroxaban may indicate physician comfort with this medication.  
7  
8

9  
10 Results from ongoing RCTs comparing rivaroxaban with warfarin, SECRET  
11  
12 investigating CVT, as well as EINSTEIN-JR investigating children with any acute VTE,  
13  
14 including CVT, will help validate safety and efficacy.<sup>40,41</sup> The least reported DOAC in  
15  
16 treatment of CVT is apixaban, with 10 patients (5%) published in case series and reports;  
17  
18 this may relate to the comparatively short time since approval and availability. While the  
19  
20 small sample precludes generalizability, no issues with safety have been reported with  
21  
22 apixaban.  
23  
24  
25  
26  
27

28  
29 The timing of DOAC use is similar between studies, with initiation occurring between 5  
30  
31 and 15 days after treatment with LMWH or UFH. The average time from CVT diagnosis  
32  
33 to initiation of DOAC was 9 days, similar to prospective trials initiating warfarin 7 days  
34  
35 after diagnosis and initial treatment with UFH or LMWH.<sup>42</sup> In one case series of 20  
36  
37 patients, the initial anticoagulation was rivaroxaban at 15mg two times per day for 3  
38  
39 weeks followed by 20mg daily, and no safety concern was highlighted.<sup>23</sup> The ongoing  
40  
41 RCT is utilizing once daily rivaroxaban dosing within 14 days of CVT diagnosis without  
42  
43 initial higher dose. Future trials should help standardize how long initial therapy with  
44  
45 LMWH or UFH is needed, if at all, prior to initiating a DOAC as well as if initial dosage  
46  
47 adjustments are needed.  
48  
49  
50  
51  
52  
53  
54  
55  
56  
57  
58  
59  
60

1  
2  
3 The prognostic value of recanalization has been investigated by a recent meta-analysis.<sup>43</sup>

4  
5 Recanalization occurred in up to 85% of patients and was associated with mRS 0-1 (OR  
6  
7 3.3, 95% CI, 1.7–6.3,  $p=0.001$ ) and less likelihood of recurrent VTE (3.4% vs. 0.9%).

8  
9  
10 Our systematic review showed a variable recanalization rate in patients treated with  
11  
12 DOAC and no reported recurrent VTE. The RCT reported 31 of 53 patients (58%) with  
13  
14 follow-up data to have recanalization at 6 months, similar to rates reported in randomized  
15  
16 trials of LMWH and UFH to treat CVT.<sup>3–5</sup> In comparison, 119 of 128 patients (93%)  
17  
18 reported outside of this RCT had recanalization after a median 6 months. The DOAC  
19  
20 used in those with no recanalization was rivaroxaban (n=3), dabigatran (n=3), and  
21  
22 apixaban (n=3).<sup>20,32,35</sup> This discrepancy is likely due to selection bias and the fact that in  
23  
24 the RCT a blinded adjudication committee evaluated recanalization rates.  
25  
26  
27  
28  
29

30  
31 Overall, our systematic review suggests outside of randomized trial setting, there are  
32  
33 physicians using DOAC for the treatment of CVT despite lack of guideline support.  
34  
35 Currently, warfarin is supported by guidelines despite no RCT evidence of superior or  
36  
37 non-inferiority to LMWH or UFH. A recent survey of Canadian neurologists and  
38  
39 hematologists suggests interest in the utilization of DOAC for treatment of CVT.<sup>44</sup> The  
40  
41 benefits of the DOAC over warfarin include reduced dose adjustments due to drug and  
42  
43 food interactions, no need for INR monitoring to ensure therapeutic range, and in the case  
44  
45 of dabigatran, the availability of a reversal agent. Furthermore, even when closely  
46  
47 monitored in a clinical trial setting, patients on warfarin for CVT were in the therapeutic  
48  
49 range of only 66.1% of the time<sup>18</sup>, suggesting better anticoagulation may be achieved  
50  
51  
52  
53  
54 with DOAC.  
55  
56  
57  
58  
59  
60



1  
2  
3  
4  
5 The results of this systematic review should be interpreted with caution. The majority of  
6 studies were retrospective cohorts or case reports prone to selection bias, confounding,  
7 and lack of standardization in initiation of therapy and outcome ascertainment. Therefore,  
8 pooling and inferential statistical analysis was not prudent due to the clinical and  
9 methodological heterogeneity. The risk of bias analysis revealed that the RCT has the  
10 lowest bias risk given utilization of a PROBE design, and although the retrospective  
11 studies inherently have increased bias, most studies were appropriately informative;  
12 specific risks of bias analyses are available in the supplement. Finally, follow-up data and  
13 treatment duration were limited to a median 6 months; longer-term registries for safety  
14 will be needed to estimate rates of recurrent CVT in patients treated with a DOAC.  
15  
16  
17  
18  
19  
20  
21  
22  
23  
24  
25  
26  
27  
28  
29  
30

31 Physicians recognize the benefits of DOAC and are increasingly using these medications  
32 for treatment of CVT. Based on this review, no clear safety concerns are identified and  
33 available data on efficacy is promising, although a majority are from retrospective studies  
34 or case series and case reports. The ideal timing for initiation of DOAC after diagnosis of  
35 CVT, and the ideal length of therapy are remaining questions. The results future RCT  
36 may inform guidelines if no adverse safety signal and similar efficacy to warfarin are  
37 seen.  
38  
39  
40  
41  
42  
43  
44  
45  
46  
47  
48  
49  
50  
51  
52  
53  
54  
55  
56  
57  
58  
59  
60

1  
2  
3 **Authorship Details** G. Bose, J. Graveline, D. Dowlatshahi and R. Shorr developed the  
4 search strategy; G. Bose, J. Graveline, and D. Dowlatshahi reviewed articles for  
5 inclusion; G. Bose, D. Fergusson, and D. Dowlatshahi performed data analysis; V.  
6 Yogendrakumar assessed articles for risk of bias; G. Bose wrote the manuscript; G. Le  
7 Gal, J. Coutinho, M. Mendonça, M. Viana-Baptista and S. Nagel contributed expert  
8 opinion and revised research question and discussion; and all authors revised the  
9 manuscript for intellectual content and approved the final manuscript.  
10  
11  
12  
13  
14  
15  
16  
17  
18  
19  
20  
21

22 **Funding statement** This research received no specific grant from any funding  
23 agency in the public, commercial or not-for-profit sectors  
24  
25  
26  
27  
28

### 29 **Competing interests**

30  
31 Dr. Bose: none  
32

33 Dr. Graveline: none  
34

35 Dr. Yogendrakumar: none  
36

37 Ms. Shorr: none  
38

39 Dr. Fergusson: none  
40  
41

42 Dr. Le Gal holds an Early Researcher Award from the Ontario Ministry of Research and  
43 Innovation (MRI); an Ontario Mid-Career Investigator Award from the Heart and Stroke  
44 Foundation of Canada; and a University of Ottawa, Faculty of Medicine Tier 1 Clinical  
45 Research Chair in Diagnosis of Venous Thromboembolism. He has indirectly received  
46 research funding from Portola, Boehringer-Ingelheim, Pfizer, Bristol-Myers Squibb, LEO  
47  
48  
49  
50  
51  
52  
53  
54  
55  
56  
57  
58  
59  
60

Pharma, Daiichi Sankyo, Bayer. He has received speaker honoraria from Bayer, Pfizer, LEO Pharma, Sanofi bioMérieux.

Dr. Coutinho: has received research funding from the following non-profit organizations: Dutch Heart Foundation, Dutch Brain Foundation and Amsterdam Neuroscience. He has also received research support from Bayer, Boehringer and Portola. All fees were paid to his institute and used to fund medical research.

Dr. Mendonça: none

Dr. Viana-Baptista received speaker fees from Boehringer Ingelheim, Portugal, is part of an advisory board of Daiichi Sankyo, Portugal, and received a travel grant from Boehringer Ingelheim, Portugal.

Dr. Nagel: received consulting fees from Brainomix and Böhringer Ingelheim and Honoria for lectures from Bayer, BMS Pfizer and Medtronic.

Dr. Dowlatshahi received a Heart & Stroke Foundation of Canada Clinician Scientist Award, and has received honoraria from Bayer, BMS, and Apopharma.

**Patient and public involvement** Patients and/or the public were not involved in the design, or conduct, or reporting or dissemination plans of this research.

**Patient consent for publication** Not required.

**Provenance and peer review** Not commissioned; externally peer reviewed.

**Data availability statement** Data are available in a public, open access repository.

All data relevant to the study are included in the article or uploaded as supplementary information. Extra data can be accessed via the Dryad data repository at <https://datadryad.org/stash>, doi: 10.5061/dryad.37pvmcvgn

## REFERENCES

1. Coutinho JM, Zuurbier SM, Aramideh M, et al. The Incidence of Cerebral Venous Thrombosis. *Stroke* 2012; 43: 3375–3377.
2. Ferro JM, Canhão P, Stam J, et al. Prognosis of cerebral vein and dural sinus thrombosis: results of the International Study on Cerebral Vein and Dural Sinus Thrombosis (ISCVT). *Stroke* 2004; 35: 664–70.
3. Einhüpl KM, Villringer A, Mehraein S, et al. Heparin treatment in sinus venous thrombosis. *Lancet* 1991; 338: 597–600.
4. de Bruijn SFTM, Stam J. Randomized, Placebo-Controlled Trial of Anticoagulant Treatment With Low-Molecular-Weight Heparin for Cerebral Sinus Thrombosis. *Stroke* 1999; 30: 484–488.
5. Coutinho J, de Bruijn SF, Deveber G, et al. Anticoagulation for cerebral venous sinus thrombosis. *Cochrane database Syst Rev* 2011; CD002005.
6. Ferro JM, Boussier M-G, Canhão P, et al. European Stroke Organization guideline for the diagnosis and treatment of cerebral venous thrombosis - endorsed by the European Academy of Neurology. *Eur J Neurol* 2017; 24: 1203–1213.

- 1  
2  
3 7. Caprio F, Bernstein RA. Duration of anticoagulation after cerebral venous  
4 sinus thrombosis. *Neurocrit Care* 2012; 16: 335–342.
- 5  
6  
7  
8 8. Kearon C, Akl EA. Duration of anticoagulant therapy for deep vein thrombosis  
9 and pulmonary embolism. *Blood* 2014; 123: 1794–801.
- 10  
11  
12 9. Mekaj YH, Mekaj AY, Duci SB, et al. New oral anticoagulants: their advantages  
13 and disadvantages compared with vitamin K antagonists in the prevention  
14 and treatment of patients with thromboembolic events. *Ther Clin Risk Manag*  
15 2015; 11: 967–77.
- 16  
17  
18 10. Ageno W, Beyer-Westendorf J, Garcia DA, et al. Guidance for the management  
19 of venous thrombosis in unusual sites. *J Thromb Thrombolysis* 2016; 41: 129–  
20 43.
- 21  
22  
23 11. Bose G, Graveline J, Dowlatshahi D. Systematic review of direct oral  
24 anticoagulants in treatment of cerebral venous thrombosis. *PROSPERO*.
- 25  
26  
27 12. Bose G, Graveline J, Yogendrakumar V, et al. Direct oral anticoagulants in  
28 treatment of cerebral venous thrombosis: a systematic review protocol. *Syst*  
29 *Rev* 2019; 8: 99.
- 30  
31  
32 13. Moher D, Shamseer L, Clarke M, et al. Preferred reporting items for systematic  
33 review and meta-analysis protocols (PRISMA-P) 2015 statement. *Syst Rev*  
34 2015; 4: 1.
- 35  
36  
37 14. Liberati A, Altman DG, Tetzlaff J, et al. The PRISMA statement for reporting  
38 systematic reviews and meta-analyses of studies that evaluate healthcare  
39 interventions: explanation and elaboration. *BMJ* 2009; 339: b2700.
- 40  
41  
42 15. Higgins JPT, Altman DG, Gotzsche PC, et al. The Cochrane Collaboration's tool  
43  
44  
45  
46  
47  
48  
49  
50  
51  
52  
53  
54  
55  
56  
57  
58  
59  
60

- for assessing risk of bias in randomised trials. *BMJ* 2011; 343: d5928–d5928.
16. Wells G, Shea B, O'Connell D, et al. The Newcastle-Ottawa Scale (NOS) for assessing the quality of nonrandomised studies in meta-analyses. *Ottawa Ottawa Hosp Res Institute; 2018*  
[http://www.ohri.ca.proxy.bib.uottawa.ca/programs/clinical\\_epidemiology/oxford.asp](http://www.ohri.ca.proxy.bib.uottawa.ca/programs/clinical_epidemiology/oxford.asp).
17. Moola S, Munn Z, Tufanaru C, et al. Joanna Briggs Institute Reviewer's Manual. *Joanna Briggs Inst; Chapter 7:*
18. Ferro JM, Coutinho JM, Dentali F, et al. Safety and Efficacy of Dabigatran Etextilate vs Dose-Adjusted Warfarin in Patients With Cerebral Venous Thrombosis. *JAMA Neurol*. Epub ahead of print 3 September 2019. DOI: 10.1001/jamaneurol.2019.2764.
19. Huang Q, Chai X, Xiao C, et al. A case report of oral contraceptive misuse induced cerebral venous sinus thrombosis and dural arteriovenous fistula. *Medicine (Baltimore)* 2019; 98: e16440.
20. Covut F, Kewan T, Perez O, et al. Apixaban and rivaroxaban in patients with cerebral venous thrombosis. *Thromb Res* 2019; 173: 77–78.
21. Hu Y, Tang Z, Zhu W, et al. Clinical Reasoning: A teenager with persistent headache. *Neurology* 2019; 92: e1526–e1531.
22. Wasay M, Khan M, Rajput HM, et al. New Oral Anticoagulants versus Warfarin for Cerebral Venous Thrombosis: A Multi-Center, Observational Study. *J Stroke* 2019; 21: 220–223.
23. Shankar Iyer R, TCR R, Akhtar S, et al. Is it safe to treat cerebral venous

- 1  
2  
3 thrombosis with oral rivaroxaban without heparin? A preliminary study from  
4  
5 20 patients. *Clin Neurol Neurosurg* 2018; 175: 108–111.  
6  
7  
8 24. Sui J, Zhang Y, Yang L, et al. Successful treatment with rivaroxaban of cerebral  
9  
10 venous thrombosis and bone marrow necrosis induced by pegaspargase: A  
11  
12 case report and literature review. *Medicine (Baltimore)* 2017; 96: e8715.  
13  
14  
15 25. Becerra AF, Amuchastegui T, Tabares AH. Decreased Rivaroxaban Levels in a  
16  
17 Patient with Cerebral Vein Thrombosis Receiving Phenytoin. *Case Rep*  
18  
19 *Hematol* 2017; 2017: 1–3.  
20  
21  
22 26. Budhram A, Shettar B, Lee DH, et al. Bilateral Cavernous Sinus Thrombosis in  
23  
24 Lemierre's Syndrome. *Can J Neurol Sci / J Can des Sci Neurol* 2017; 44: 424–  
25  
26 426.  
27  
28  
29 27. Cappellari M, Bovi P. Direct oral anticoagulants in patients with cervical artery  
30  
31 dissection and cerebral venous thrombosis. A case series and review of the  
32  
33 literature. *Int J Cardiol* 2017; 244: 282–284.  
34  
35  
36 28. Hsu Y, Juan C, Le J, et al. Anti-N-methyl-D-aspartate-receptor encephalitis  
37  
38 complicated with antiphospholipid syndrome and cerebral venous  
39  
40 thrombosis. *J Clin Rheumatol* 2017; 23: 294–295.  
41  
42  
43 29. Inche Mat LN, Wan Sulaiman WA, Hoo FK, et al. A rare case of vein of Galen  
44  
45 thrombosis: Exploring a potential role for novel oral anticoagulants (NOACs)  
46  
47 in cerebral deep vein thrombosis. *Rawal Medical Journal* 2017; 42: 432–434.  
48  
49  
50 30. Rao SK, Ibrahim M, Hanni CM, et al. Apixaban for the treatment of cerebral  
51  
52 venous thrombosis: A case series. *J Neurol Sci* 2017; 381: 318–320.  
53  
54  
55 31. Talamo L, Douvas M, Macik BG, et al. Successful treatment with apixaban of  
56  
57  
58  
59  
60

- 1  
2  
3 sinus venous thrombosis due to pegylated asparaginase in a young adult with  
4  
5 T cell acute lymphoblastic leukemia: case report and review of management.  
6  
7 *Ann Hematol* 2017; 96: 691–693.  
8  
9
- 10 32. Herweh C, Griebe M, Geisbüsch C, et al. Frequency and temporal profile of  
11  
12 recanalization after cerebral vein and sinus thrombosis. *Eur J Neurol* 2016;  
13  
14 23: 681–687.  
15  
16
- 17 33. Cho Y, Chae MK, Cha JM, et al. Cerebral venous thrombosis in a patient with  
18  
19 Crohn's disease. *Intest Res* 2016; 14: 96.  
20  
21
- 22 34. Micieli JA, Derkatch S, Pereira VM, et al. Development of dural arteriovenous  
23  
24 fistulas after cerebral venous sinus thrombosis. *J Neuro-Ophthalmology* 2016;  
25  
26 36: 53–57.  
27  
28
- 29 35. Mendonça MD, Barbosa R, Cruz-e-Silva V, et al. Oral direct thrombin inhibitor  
30  
31 as an alternative in the management of cerebral venous thrombosis: A series  
32  
33 of 15 patients. *Int J Stroke* 2015; 10: 1115–1118.  
34  
35
- 36 36. Mutgi SA, Grose NA, Behrouz R. Rivaroxaban for the treatment of cerebral  
37  
38 venous thrombosis. *Int J Stroke* 2015; 10: 167–168.  
39  
40
- 41 37. Sugie M, Iizuka N, Shimizu Y, et al. Cerebral Venous Thromboembolism in  
42  
43 Antiphospholipid Syndrome Successfully Treated with the Combined Use of  
44  
45 an Anti-Xa Inhibitor and Corticosteroid. *Intern Med* 2015; 54: 3051–3056.  
46  
47
- 48 38. Mathew T, Lobo AM, Kukkuta Sarma GR, et al. A case of post varicella cortical  
49  
50 venous thrombosis successfully treated with dabigatran. *Neurol India* 2013;  
51  
52 61: 531–532.  
53  
54
- 55 39. Hon SFK, Li HLT, Cheng PW. Use of direct thrombin inhibitor for treatment of  
56  
57  
58  
59  
60



- 1  
2  
3 cerebral venous thrombosis. *J Stroke Cerebrovasc Dis* 2012; 21: 915.e11-  
4  
5 915.e15.  
6  
7  
8 40. Thalia Field U of BC. Study of Rivaroxaban for CeREbral Venous Thrombosis  
9  
10 (SECRET). ClinicalTrials.gov Identifier: NCT03178864.  
11  
12 41. Bayer. EINSTEIN Junior: Oral Rivaroxaban in Children With Venous  
13  
14 Thrombosis (EINSTEIN Jr). ClinicalTrials.gov Identifier: NCT02234843.  
15  
16  
17 42. Sartori MT, Zampieri P, Barbar S, et al. A prospective cohort study on patients  
18  
19 treated with anticoagulants for cerebral vein thrombosis. *Eur J Haematol*  
20  
21 2012; 89: 177–82.  
22  
23  
24 43. Aguiar de Sousa D, Lucas Neto L, Canhão P, et al. Recanalization in Cerebral  
25  
26 Venous Thrombosis. *Stroke* 2018; STROKEAHA.118.022129.  
27  
28  
29 44. Field TS, Camden M-C, Al-Shimemeri S, et al. Off-label use of novel  
30  
31 anticoagulants for treatment of cerebral venous thrombosis: A Canadian  
32  
33 survey. *Int J Stroke* 2017; 12: NP16–NP18.  
34  
35  
36  
37  
38  
39  
40  
41  
42  
43  
44  
45  
46  
47  
48  
49  
50  
51  
52  
53  
54  
55  
56  
57  
58  
59  
60

1  
2  
3 **FIGURE LEGEND**  
4

5 **Figure 1.** PRISMA flow diagram of studies included in systematic review. (N = number,  
6

7  
8 CVT = cerebral venous thrombosis, DOAC = direct oral anticoagulant)  
9  
10  
11  
12  
13  
14  
15  
16  
17  
18  
19  
20  
21  
22  
23  
24  
25  
26  
27  
28  
29  
30  
31  
32  
33  
34  
35  
36  
37  
38  
39  
40  
41  
42  
43  
44  
45  
46  
47  
48  
49  
50  
51  
52  
53  
54  
55  
56  
57  
58  
59  
60

**Table 1. Published patients with CVT treated with DOAC**

| Study                                    | Year | Location      | Anticoagulant | N  | Study Type                  |
|------------------------------------------|------|---------------|---------------|----|-----------------------------|
| Ferro <i>et al.</i> <sup>18</sup>        | 2019 | Multicenter   | Dabigatran    | 60 | Randomized controlled trial |
| Huang <i>et al.</i> <sup>19</sup>        | 2019 | China         | Dabigatran    | 1  | Case report                 |
| Covut <i>et al.</i> <sup>20</sup>        | 2019 | USA           | Rivaroxaban   | 4  | Case series                 |
|                                          |      |               | Apixaban      | 5  |                             |
| Hu <i>et al.</i> <sup>21</sup>           | 2019 | China         | Dabigatran    | 1  | Case report                 |
| Wasay <i>et al.</i> <sup>22</sup>        | 2019 | Multicenter   | Rivaroxaban   | 36 | Retrospective cohort        |
|                                          |      |               | Dabigatran    | 9  |                             |
| Shankar Iyer <i>et al.</i> <sup>23</sup> | 2018 | India         | Rivaroxaban   | 20 | Case series                 |
| Sui <i>et al.</i> <sup>24</sup>          | 2017 | China         | Rivaroxaban   | 1  | Case report                 |
| Becerra <i>et al.</i> <sup>25</sup>      | 2017 | Argentina     | Rivaroxaban   | 1  | Case report                 |
| Budhram <i>et al.</i> <sup>26</sup>      | 2017 | Canada        | Rivaroxaban   | 1  | Case report                 |
| Cappellari <i>et al.</i> <sup>27</sup>   | 2017 | Italy         | Rivaroxaban   | 4  | Case series                 |
| Hsu <i>et al.</i> <sup>28</sup>          | 2017 | China         | Rivaroxaban   | 1  | Case report                 |
| Inche Mat <i>et al.</i> <sup>29</sup>    | 2017 | Malaysia      | Dabigatran    | 1  | Case report                 |
| Rao <i>et al.</i> <sup>30</sup>          | 2017 | United States | Apixaban      | 3  | Case report                 |
| Talamo <i>et al.</i> <sup>31</sup>       | 2017 | United States | Apixaban      | 1  | Case report                 |

|                                                                                         |      |               |                         |         |                         |
|-----------------------------------------------------------------------------------------|------|---------------|-------------------------|---------|-------------------------|
| Herweh <i>et al.</i> <sup>32</sup>                                                      | 2016 | Germany       | Rivaroxaban<br>Apixaban | 12<br>1 | Retrospective<br>cohort |
| Cho <i>et al.</i> <sup>33</sup>                                                         | 2016 | South Korea   | Rivaroxaban             | 1       | Case report             |
| Micieli <i>et al.</i> <sup>34</sup>                                                     | 2016 | Canada        | Rivaroxaban             | 1       | Case report             |
| Mendonça <i>et al.</i> <sup>35*</sup>                                                   | 2015 | Portugal      | Dabigatran              | 18      | Case series             |
| Mutgi <i>et al.</i> <sup>36</sup>                                                       | 2015 | United States | Rivaroxaban             | 2       | Case report             |
| Sugie <i>et al.</i> <sup>37</sup>                                                       | 2015 | Japan         | Rivaroxaban             | 1       | Case report             |
| Mathew <i>et al.</i> <sup>38</sup>                                                      | 2013 | India         | Dabigatran              | 1       | Case report             |
| Hon <i>et al.</i> <sup>39</sup>                                                         | 2012 | Hong Kong     | Dabigatran              | 2       | Case report             |
| * <i>Three patients not included in original publication were included for analysis</i> |      |               |                         |         |                         |

**Table 2. Summary of published patients with CVT treated by a DOAC**

| Study                          | RCT                      | Retrospective cohorts    |                       |                           | Case Series and Reports |                         |                                               |
|--------------------------------|--------------------------|--------------------------|-----------------------|---------------------------|-------------------------|-------------------------|-----------------------------------------------|
|                                | (N=60)                   | (N=57)                   |                       |                           | (N=69)                  |                         |                                               |
|                                | Ferro <i>et al.</i> (22) | Wasay <i>et al.</i> (38) |                       | Herweh <i>et al.</i> (28) |                         |                         |                                               |
| DOAC, N (%)                    | Dabigatran<br>60 (100%)  | Rivaroxaban<br>36 (80%)  | Dabigatran<br>9 (20%) | Rivaroxaban<br>12 (92%)   | Apixaban<br>1 (8%)      | Rivaroxaban<br>36 (57%) | Dabigatran<br>24 (26%)<br>Apixaban<br>9 (17%) |
| Female (%)                     | 33 (55)                  | 27 (60)                  |                       | 8 (62)                    |                         | 15 (42)                 | 20 (83)<br>6 (67)                             |
| Age (SD)                       | 45.2<br>(13.8)           | 36.5<br>(14.7)           |                       | 41.7<br>(20.5)            |                         | 37.3<br>(15.5)          | 40.2<br>(13.6)<br>46.8<br>(23.7)              |
| Time to DOAC start, days (IQR) | 5 to 15<br>(N/A)         | 7<br>(3-12)              |                       | 6<br>(4-9)                |                         | 0<br>(0-2.5)            | 14<br>(10.5-19.5)<br>4<br>(2-7)               |
| Time on DOAC, months (range)   | 6<br>(N/A)               | 8<br>(6-13)              |                       | 7<br>(1-14)               |                         | 6<br>(1.5-12)           | 18.5<br>(2-41)<br>9<br>(1.5-56)               |
| No recanalization (%)*         | 22 of 53<br>(41.5)       | 0 of 5<br>(0)            |                       | 2 of 13<br>(15)           |                         | 1 of 35<br>(3)          | 3 of 22<br>(14)<br>4 of 9<br>(44)             |
| New ICH (%)                    | 0 (0)                    | 0 (0)                    |                       | 0 (0)                     |                         | 0 (0)                   | 1 (4)<br>0 (0)                                |
| Any bleed (%)                  | 12 (20)                  | 2 (5)                    |                       | 3 (23)                    |                         | 0 (0)                   | 3 (12.5)<br>1 (11)                            |
| mRS 0 or 1 (%)*                | 54 of 59<br>(91.5)       | 25 of 39<br>(64)         |                       | 12 of 13<br>(92)          |                         | 35 of 36<br>(97)        | 19 of 22<br>(86)<br>5 of 6<br>(83)            |
| mRS 2 or 3 (%)*                | 4 of 59                  | 12 of 39                 |                       | 1 of 13                   |                         | 1 of 36                 | 3 of 22<br>0 of 6                             |

|               |                  |                |                |                |                |                |
|---------------|------------------|----------------|----------------|----------------|----------------|----------------|
|               | (6.7)            | (31)           | (8)            | (3)            | (14)           | (0)            |
| mRS >3 (%)*   | 1 of 59<br>(1.7) | 3 of 39<br>(8) | 0 of 13<br>(0) | 0 of 36<br>(0) | 0 of 22<br>(0) | 1 of 6<br>(17) |
| Mortality (%) | 0 (0)            | 2 (4)          | 0 (0)          | 0 (0)          | 0 (0)          | 0 (0)          |

\*. Follow-up not available for all patients, denominator is shown

*RCT = randomized controlled trial; DOAC = direct oral anticoagulant; ICH = intracranial*

*hemorrhage; mRS = modified Rankin Scale;*

*N = number; SD = standard-deviation; IQR = inter-quartile range;*

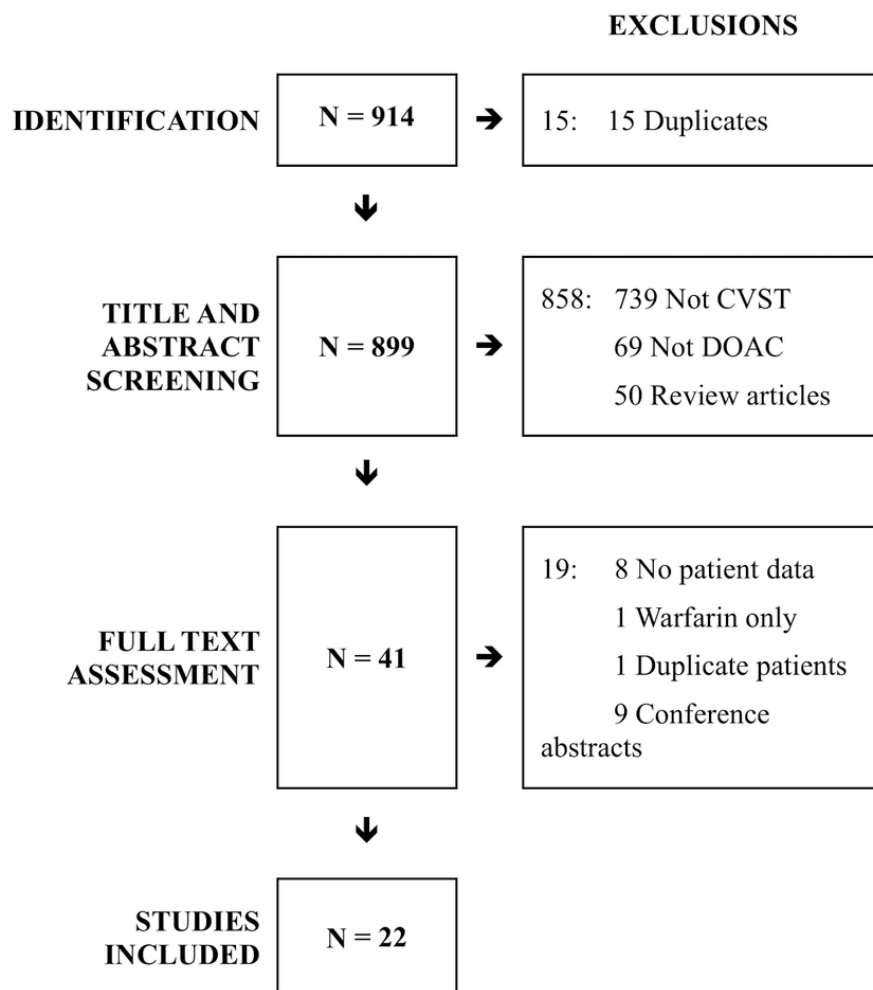

39  
40  
41  
42  
43  
44  
45  
46  
47  
48  
49  
50  
51  
52  
53  
54  
55  
56  
57  
58  
59  
60

Figure 1. PRISMA flow diagram of studies included in systematic review. (N = number, CVT = cerebral venous thrombosis, DOAC = direct oral anticoagulant)

80x82mm (300 x 300 DPI)

Direct oral anticoagulants in treatment of cerebral venous thrombosis: systematic review

**SUPPLEMENTAL MATERIAL**

**Appendix I: Search Strategy**

The complete protocol is previously published(1) and is hosted on PROSPERO (ID: CRD42017078398).(2)

Ovid MEDLINE(R) ALL  
Strategy:

1. apixaban.mp.
2. edoxaban.mp.
3. Dabigatran.mp.
4. Rivaroxaban.mp.
5. (doac\* or noac\*).tw,kw.
6. ((direct oral or novel) adj3 (anticoagul\* or anti coagulat\*)).tw.
7. exp Factor Xa Inhibitors/
8. Factor Xa Inhibit\*.mp.
9. Antithrombins/ or thrombin inhibit\*.mp.
10. or/1-9
11. "intracranial embolism and thrombosis"/ or intracranial thrombosis/ or exp sinus thrombosis, intracranial/
12. cvt.tw,kw.
13. (cerebral veins/ or exp cranial sinuses/) and (thrombosis/ or venous thrombosis/)
14. ((sinus\* or sinovenous or cerebral or cavernous or sagittal venous or sagittal vein\* or cerebrovenous or cerebro-venous or sigmoid) and thrombo\*).tw,kw.
15. intracran\* thrombo\*.kw. or (intracran\* adj3 thrombo\*).tw.
16. 11 or 12 or 13 or 14 or 15
17. 10 and 16

Database: Embase Classic+Embase  
Strategy:

1. apixaban.mp.
2. edoxaban.mp.
3. Dabigatran.mp.
4. Rivaroxaban.mp.
5. (doac\* or noac\*).tw.
6. ((direct oral or novel) adj3 (anticoagul\* or anti coagulat\*)).tw.
7. exp \*Factor Xa Inhibitors/
8. Factor Xa Inhibit\*.tw.
9. exp \*thrombin inhibitor/ or thrombin\* inhibit\*.tw.



10. or/1-9
11. exp cerebral sinus thrombosis/ or \*occlusive cerebrovascular disease/
12. ((sinus\* or sinovenous or cerebral or cavernous or sagittal venous or sagittal vein\* or cerebrovenous or cerebro-venous or sigmoid) and thrombo\*).tw.
13. (intracran\* adj3 thrombo\*).tw.
14. cvt.tw.
15. or/11-14
16. 10 and 15

Database: EBM Reviews - Cochrane Central Register of Controlled Trials

Search Strategy:

1. apixaban.mp.
2. edoxaban.mp.
3. Dabigatran.mp.
4. Rivaroxaban.mp.
5. (doac\* or noac\*).tw,kw.
6. ((direct oral or novel) adj3 (anticoagul\* or anti coagulat\*)).tw.
7. exp Factor Xa Inhibitors/
8. Factor Xa Inhibit\*.mp.
9. Antithrombins/ or thrombin inhibit\*.mp.
10. or/1-9
11. "intracranial embolism and thrombosis"/ or intracranial thrombosis/ or exp sinus thrombosis, intracranial/
12. cvt.tw,kw.
13. (cerebral veins/ or exp cranial sinuses/) and (thrombosis/ or venous thrombosis/)
14. ((sinus\* or sinovenous or cerebral or cavernous or sagittal venous or sagittal vein\* or cerebrovenous or cerebro-venous or sigmoid) and thrombo\*).tw,kw.
15. intracran\* thrombo\*.kw. or (intracran\* adj3 thrombo\*).tw.
16. 11 or 12 or 13 or 14 or 15
17. 10 and 16

## Appendix II: Risk of Bias Tables

### I: Randomized Controlled Trials; Cochrane Risk of Bias Tool

|                         | Year | Random Sequence Generation                                                             | Allocation Concealment                                                 | Blinding of Participants                                                             | Blinding of Outcome Assessment                                                                     | Incomplete Outcome Data                                                                                                                                     | Selective Reporting                                                 | Other Bias                                                                      |
|-------------------------|------|----------------------------------------------------------------------------------------|------------------------------------------------------------------------|--------------------------------------------------------------------------------------|----------------------------------------------------------------------------------------------------|-------------------------------------------------------------------------------------------------------------------------------------------------------------|---------------------------------------------------------------------|---------------------------------------------------------------------------------|
| Ferro <i>et al.</i> (3) | 2019 | <b>Low Risk:</b><br>Patients were randomized using an online 24-hour telephone service | <b>Low Risk:</b><br>Concealment maintained using the telephone service | <b>High Risk:</b><br>Patients and treating teams were aware of treatment allocation. | <b>Low Risk:</b><br>All outcomes were adjudicated in a blinded manner by an adjudication committee | <b>Low Risk:</b> All missing/excluded patients were disclosed by study authors. Reasons for exclusion were provided. 11 patients lost to follow-up overall. | <b>Low Risk:</b> all outcomes that were pre-specified were reported | <b>Unclear:</b> exploratory trial with no formal hypothesis statistical testing |

**II: Observational Cohorts; NewCastle Ottawa Scale**

|                             | Year | Selection<br>(Max ★★★★★)                       |                                                  |                              |                                        | Comparability<br>(Max ★★)                     | Outcome<br>Max (★★★)     |                                  |                                         |
|-----------------------------|------|------------------------------------------------|--------------------------------------------------|------------------------------|----------------------------------------|-----------------------------------------------|--------------------------|----------------------------------|-----------------------------------------|
|                             |      | Representativeness<br>of the exposed<br>cohort | Selection<br>of the<br>non-<br>exposed<br>cohort | Ascertainment<br>of exposure | Outcome<br>absent at<br>study<br>start | Comparable<br>cohorts (design<br>or analysis) | Assessment<br>of outcome | Appropriate<br>follow-up<br>time | Adequate<br>follow-<br>up of<br>cohorts |
| Wasay<br><i>et al.</i> (4)  | 2019 | ★                                              | ★                                                | ★                            | ★                                      |                                               |                          | ★                                | ★                                       |
| Herweh<br><i>et al.</i> (5) | 2016 | ★                                              | ★                                                | ★                            | ★                                      |                                               |                          | ★                                | ★                                       |

1  
2  
3  
4  
5  
6  
7  
8  
9  
10  
11  
12  
13  
14  
15  
16  
17  
18  
19  
20  
21  
22  
23  
24  
25  
26  
27  
28  
29  
30  
31  
32  
33  
34  
35  
36  
37  
38  
39  
40  
41  
42  
43  
44  
45  
46  
47

### III: Case Series; Johanna Briggs Institute Critical Appraisal for Case Series

|                                | Year | Clear Inclusion Criteria | Condition Measured in Reliable Way | Valid Method to ID condition | Consecutive Inclusion | Complete Inclusion | Demographics | Clinical Information | Outcomes | Presenting Site, Clinical Demographics | Stat Analysis |
|--------------------------------|------|--------------------------|------------------------------------|------------------------------|-----------------------|--------------------|--------------|----------------------|----------|----------------------------------------|---------------|
| Covut <i>et al.</i> (6)        | 2019 | Y                        | N                                  | N                            | Y                     | Y                  | Y            | Y                    | Y        | N                                      | N             |
| Shankar Iyer <i>et al.</i> (7) | 2018 | Y                        | Unclear                            | Unclear                      | Y                     | Y                  | Y            | Y                    | Y        | N                                      | N             |
| Cappellari <i>et al.</i> (8)   | 2017 | Y                        | Unclear                            | Unclear                      | Unclear               | Unclear            | Y            | Y                    | Y        | N                                      | Y             |
| Mendonca <i>et al.</i> (9)     | 2015 | Y                        | Y                                  | Y                            | Y                     | Y                  | Y            | Y                    | Y        | Y                                      | N             |

#### IV: Case Reports; Johanna Briggs Institute Critical Appraisal

|                              | Year | Patient Demographics Clearly Described | Patient History Clearly Described | Clinical Condition Clearly Described | Diagnostic Tests Well Described | Intervention or Treatment Well Described | Post-Intervention Clinical Condition | Adverse Events | Takeaway Lesson? |
|------------------------------|------|----------------------------------------|-----------------------------------|--------------------------------------|---------------------------------|------------------------------------------|--------------------------------------|----------------|------------------|
| Huang <i>et al.</i> (10)     | 2019 | N                                      | Y                                 | Y                                    | Y                               | Y                                        | Y                                    | Y              | Y                |
| Hu <i>et al.</i> (11)        | 2019 | Y                                      | Y                                 | Y                                    | Y                               | Y                                        | Y                                    | N              | Y                |
| Sui <i>et al.</i> (12)       | 2017 | N                                      | Y                                 | Y                                    | Y                               | Y                                        | Y                                    | N              | Y                |
| Becerra <i>et al.</i> (13)   | 2017 | N                                      | Y                                 | Y                                    | Y                               | Y                                        | Y                                    | Y              | Y                |
| Budhram <i>et al.</i> (14)   | 2017 | Y                                      | Y                                 | Y                                    | Y                               | Y                                        | N                                    | N              | Y                |
| Hsu <i>et al.</i> (15)       | 2017 | N                                      | Y                                 | Y                                    | Y                               | Y                                        | Y                                    | N              | Y                |
| Inche Mat <i>et al.</i> (16) | 2017 | Y                                      | N                                 | Y                                    | N                               | Y                                        | N                                    | N              | Y                |
| Rao <i>et al.</i> (17)       | 2017 | N                                      | Y                                 | Y                                    | Y                               | Y                                        | Y                                    | N              | Y                |
| Talamo <i>et al.</i> (18)    | 2017 | Y                                      | Y                                 | Y                                    | Y                               | Y                                        | Y                                    | N              | Y                |
| Cho <i>et al.</i> (19)       | 2016 | Y                                      | Y                                 | Y                                    | Y                               | Y                                        | Y                                    | N              | Y                |
| Mieli <i>et al.</i> (20)     | 2016 | Y                                      | Y                                 | N                                    | Y                               | N                                        | Y                                    | N              | N                |
| Mutgi <i>et al.</i> (21)     | 2015 | N                                      | N                                 | N                                    | Y                               | N                                        | Y                                    | N              | Y                |
| Sugie <i>et al.</i> (22)     | 2015 | Y                                      | Y                                 | Y                                    | Y                               | Y                                        | Y                                    | N              | Y                |
| Mathew <i>et al.</i> (23)    | 2013 | N                                      | Y                                 | Y                                    | Y                               | Y                                        | Y                                    | N              | Y                |
| Hon <i>et al.</i> (24)       | 2012 | Y                                      | Y                                 | Y                                    | Y                               | Y                                        | Y                                    | N              | Y                |

**REFERENCES**

1. Bose G, Graveline J, Yogendrakumar V, Fergusson D, Dowlatshahi D. Direct oral anticoagulants in treatment of cerebral venous thrombosis: a systematic review protocol. *Syst Rev* [Internet]. 2019;8(1):99. Available from: <https://doi.org/10.1186/s13643-019-1022-8>
2. Bose G, Graveline J, Dowlatshahi D. Systematic review of direct oral anticoagulants in treatment of cerebral venous thrombosis. *PROSPERO*. 2017;(CRD42017078398).
3. Ferro JM, Coutinho JM, Dentali F, Kobayashi A, Alasheev A, Canhão P, et al. Safety and Efficacy of Dabigatran Etexilate vs Dose-Adjusted Warfarin in Patients With Cerebral Venous Thrombosis. *JAMA Neurol* [Internet]. 2019 Sep 3; Available from: <https://jamanetwork.com/journals/jamaneurology/fullarticle/2749167>
4. Wasay M, Khan M, Rajput HM, Farooq S, Memon MI, AlRukn SA, et al. New Oral Anticoagulants versus Warfarin for Cerebral Venous Thrombosis: A Multi-Center, Observational Study. *J Stroke* [Internet]. 2019 May 31;21(2):220–3. Available from: <http://j-stroke.org/journal/view.php?doi=10.5853/jos.2019.00150>
5. Herweh C, Griebbe M, Geisbüsch C, Szabo K, Neumaier-Probst E, Hennerici MG, et al. Frequency and temporal profile of recanalization after cerebral vein and sinus thrombosis. *Eur J Neurol*. 2016;23(4):681–7.
6. Covut F, Kewan T, Perez O, Flores M, Haddad A, Daw H. Apixaban and rivaroxaban in patients with cerebral venous thrombosis. *Thromb Res* [Internet]. 2019 Jan;173:77–8. Available from: <https://linkinghub.elsevier.com/retrieve/pii/S0049384818306121>
7. Shankar Iyer R, TCR R, Akhtar S, Muthukalathi K, Kumar P, Muthukumar K. Is it safe to treat cerebral venous thrombosis with oral rivaroxaban without heparin? A preliminary study from 20 patients. *Clin Neurol Neurosurg* [Internet]. 2018 Dec;175:108–11. Available from: <https://linkinghub.elsevier.com/retrieve/pii/S0303846718304256>
8. Cappellari M, Bovi P. Direct oral anticoagulants in patients with cervical artery dissection and cerebral venous thrombosis. A case series and review of the literature. *Int J Cardiol* [Internet]. 2017;244:282–4. Available from: <http://dx.doi.org/10.1016/j.ijcard.2017.06.006>
9. Mendonça MD, Barbosa R, Cruz-e-Silva V, Calado S, Viana-Baptista M. Oral direct thrombin inhibitor as an alternative in the management of cerebral venous thrombosis: A series of 15 patients. *Int J Stroke*. 2015;10(7):1115–8.
10. Huang Q, Chai X, Xiao C, Cao X. A case report of oral contraceptive misuse induced cerebral venous sinus thrombosis and dural arteriovenous fistula. *Medicine (Baltimore)* [Internet]. 2019 Aug;98(33):e16440. Available from: <http://insights.ovid.com/crossref?an=00005792-201908160-00002>
11. Hu Y, Tang Z, Zhu W, Xu S. Clinical Reasoning: A teenager with persistent headache. *Neurology* [Internet]. 2019 Mar 26;92(13):e1526–31. Available from: <http://www.neurology.org/lookup/doi/10.1212/WNL.0000000000007184>
12. Sui J, Zhang Y, Yang L, Wang H, Xu J, Wei R, et al. Successful treatment with rivaroxaban of cerebral venous thrombosis and bone marrow necrosis induced by pegaspargase: A case report and literature review. *Medicine (Baltimore)* [Internet].

- 2017 Nov;96(46):e8715. Available from:  
<http://www.ncbi.nlm.nih.gov/pubmed/29145310>
13. Becerra AF, Amuchastegui T, Tabares AH. Decreased Rivaroxaban Levels in a Patient with Cerebral Vein Thrombosis Receiving Phenytoin. *Case Rep Hematol* [Internet]. 2017;2017:1–3. Available from:  
<https://www.hindawi.com/journals/crihem/2017/4760612/>
  14. Budhram A, Shettar B, Lee DH, Silverman M, Gupta K. Bilateral Cavernous Sinus Thrombosis in Lemierre’s Syndrome. *Can J Neurol Sci / J Can des Sci Neurol* [Internet]. 2017;44(04):424–6. Available from:  
[https://www.cambridge.org/core/product/identifiser/S0317167116004388/type/journal\\_article](https://www.cambridge.org/core/product/identifiser/S0317167116004388/type/journal_article)
  15. Hsu Y, Juan C, Le J, Lin Y, Lai C. Anti-N-methyl-D-aspartate-receptor encephalitis complicated with antiphospholipid syndrome and cerebral venous thrombosis. *J Clin Rheumatol*. 2017;23(5):294–5.
  16. Inche Mat LN, Wan Sulaiman WA, Hoo FK, Sallehuddin H, Basri H. A rare case of vein of Galen thrombosis: Exploring a potential role for novel oral anticoagulants (NOACs) in cerebral deep vein thrombosis. *Vol. 42, Rawal Medical Journal*. 2017. p. 432–4.
  17. Rao SK, Ibrahim M, Hanni CM, Suchdev K, Parker D, Rajamani K, et al. Apixaban for the treatment of cerebral venous thrombosis: A case series. *J Neurol Sci*. 2017;381(September):318–20.
  18. Talamo L, Douvas M, Macik BG, Ornan D. Successful treatment with apixaban of sinus venous thrombosis due to pegylated asparaginase in a young adult with T cell acute lymphoblastic leukemia: case report and review of management. *Ann Hematol*. 2017;96(4):691–3.
  19. Cho Y, Chae MK, Cha JM, Lee J II, Joo KR, Shin HP, et al. Cerebral venous thrombosis in a patient with Crohn’s disease. *Intest Res* [Internet]. 2016;14(1):96. Available from:  
<http://synapse.koreamed.org/DOIx.php?id=10.5217/ir.2016.14.1.96>
  20. Micieli JA, Derkatch S, Pereira VM, Margolin EA. Development of dural arteriovenous fistulas after cerebral venous sinus thrombosis. *J Neuro-Ophthalmology*. 2016;36(1):53–7.
  21. Mutgi SA, Grose NA, Behrouz R. Rivaroxaban for the treatment of cerebral venous thrombosis. *Int J Stroke*. 2015;10(A100):167–8.
  22. Sugie M, Iizuka N, Shimizu Y, Ichikawa H. Cerebral Venous Thromboembolism in Antiphospholipid Syndrome Successfully Treated with the Combined Use of an Anti-Xa Inhibitor and Corticosteroid. *Intern Med* [Internet]. 2015;54(23):3051–6. Available from:  
[https://www.jstage.jst.go.jp/article/internalmedicine/54/23/54\\_54.5045/\\_article](https://www.jstage.jst.go.jp/article/internalmedicine/54/23/54_54.5045/_article)
  23. Mathew T, Lobo A, Kukkuta Sarma G, Nadig R. A case of post varicella cortical venous thrombosis successfully treated with dabigatran. *Neurol India* [Internet]. 2013;61(5):531. Available from:  
<http://www.neurologyindia.com/text.asp?2013/61/5/530/121938>
  24. Hon SFK, Li HLT, Cheng PW. Use of direct thrombin inhibitor for treatment of cerebral venous thrombosis. *J Stroke Cerebrovasc Dis*. 2012;21(8):915.e11–915.e15.

1  
2  
3  
4  
5  
6  
7  
8  
9  
10  
11  
12  
13  
14  
15  
16  
17  
18  
19  
20  
21  
22  
23  
24  
25  
26  
27  
28  
29  
30  
31  
32  
33  
34  
35  
36  
37  
38  
39  
40  
41  
42  
43  
44  
45  
46  
47  
48  
49  
50  
51  
52  
53  
54  
55  
56  
57  
58  
59  
60

For peer review only



Bose G, et al. *Direct oral anticoagulants in treatment of cerebral venous thrombosis: systematic review. PRISMA Checklist*

| Section/topic             | # | Checklist item                                                                                                                                                                                                                                                                                              | Reported on page # |
|---------------------------|---|-------------------------------------------------------------------------------------------------------------------------------------------------------------------------------------------------------------------------------------------------------------------------------------------------------------|--------------------|
| <b>TITLE</b>              |   |                                                                                                                                                                                                                                                                                                             |                    |
| Title                     | 1 | Identify the report as a systematic review, meta-analysis, or both.                                                                                                                                                                                                                                         | 1                  |
| <b>ABSTRACT</b>           |   |                                                                                                                                                                                                                                                                                                             |                    |
| Structured summary        | 2 | Provide a structured summary including, as applicable: background; objectives; data sources; study eligibility criteria, participants, and interventions; study appraisal and synthesis methods; results; limitations; conclusions and implications of key findings; systematic review registration number. | 2                  |
| <b>INTRODUCTION</b>       |   |                                                                                                                                                                                                                                                                                                             |                    |
| Rationale                 | 3 | Describe the rationale for the review in the context of what is already known.                                                                                                                                                                                                                              | 3                  |
| Objectives                | 4 | Provide an explicit statement of questions being addressed with reference to participants, interventions, comparisons, outcomes, and study design (PICOS).                                                                                                                                                  | 4                  |
| <b>METHODS</b>            |   |                                                                                                                                                                                                                                                                                                             |                    |
| Protocol and registration | 5 | Indicate if a review protocol exists, if and where it can be accessed (e.g., Web address), and, if available, provide registration information including registration number.                                                                                                                               | 4                  |
| Eligibility criteria      | 6 | Specify study characteristics (e.g., PICOS, length of follow-up) and report characteristics (e.g., years considered, language, publication status) used as criteria for eligibility, giving rationale.                                                                                                      | 4                  |
| Information sources       | 7 | Describe all information sources (e.g., databases with dates of coverage, contact with study                                                                                                                                                                                                                | 4                  |

Bose G, et al. Direct oral anticoagulants in treatment of cerebral venous thrombosis: systematic review. PRISMA Checklist

|                                    |    |                                                                                                                                                                                                                        |            |
|------------------------------------|----|------------------------------------------------------------------------------------------------------------------------------------------------------------------------------------------------------------------------|------------|
|                                    |    | authors to identify additional studies) in the search and date last searched.                                                                                                                                          |            |
| Search                             | 8  | Present full electronic search strategy for at least one database, including any limits used, such that it could be repeated.                                                                                          | Appendix I |
| Study selection                    | 9  | State the process for selecting studies (i.e., screening, eligibility, included in systematic review, and, if applicable, included in the meta-analysis).                                                              | 4          |
| Data collection process            | 10 | Describe method of data extraction from reports (e.g., piloted forms, independently, in duplicate) and any processes for obtaining and confirming data from investigators.                                             | 4          |
| Data items                         | 11 | List and define all variables for which data were sought (e.g., PICOS, funding sources) and any assumptions and simplifications made.                                                                                  | 4 and 5    |
| Risk of bias in individual studies | 12 | Describe methods used for assessing risk of bias of individual studies (including specification of whether this was done at the study or outcome level), and how this information is to be used in any data synthesis. | 5          |
| Summary measures                   | 13 | State the principal summary measures (e.g., risk ratio, difference in means).                                                                                                                                          | 5          |
| Synthesis of results               | 14 | Describe the methods of handling data and combining results of studies, if done, including measures of consistency (e.g., $I^2$ ) for each meta-analysis.                                                              | 5          |

Bose G, et al. Direct oral anticoagulants in treatment of cerebral venous thrombosis: systematic review. *PRISMA Checklist*

| Section/topic                 | #  | Checklist item                                                                                                                                                                                           | Reported on page # |
|-------------------------------|----|----------------------------------------------------------------------------------------------------------------------------------------------------------------------------------------------------------|--------------------|
| Risk of bias across studies   | 15 | Specify any assessment of risk of bias that may affect the cumulative evidence (e.g., publication bias, selective reporting within studies).                                                             | 5 and Appendix II  |
| Additional analyses           | 16 | Describe methods of additional analyses (e.g., sensitivity or subgroup analyses, meta-regression), if done, indicating which were pre-specified.                                                         | n/a                |
| <b>RESULTS</b>                |    |                                                                                                                                                                                                          |                    |
| Study selection               | 17 | Give numbers of studies screened, assessed for eligibility, and included in the review, with reasons for exclusions at each stage, ideally with a flow diagram.                                          | 5                  |
| Study characteristics         | 18 | For each study, present characteristics for which data were extracted (e.g., study size, PICOS, follow-up period) and provide the citations.                                                             | 6, table 1 and 2   |
| Risk of bias within studies   | 19 | Present data on risk of bias of each study and, if available, any outcome level assessment (see item 12).                                                                                                | 9 and Appendix II  |
| Results of individual studies | 20 | For all outcomes considered (benefits or harms), present, for each study: (a) simple summary data for each intervention group (b) effect estimates and confidence intervals, ideally with a forest plot. | 6-9                |
| Synthesis of results          | 21 | Present results of each meta-analysis done, including confidence intervals and measures of                                                                                                               | n/a                |

Bose G, et al. *Direct oral anticoagulants in treatment of cerebral venous thrombosis: systematic review. PRISMA Checklist*

|                             |    |                                                                                                                                                                                      |                |
|-----------------------------|----|--------------------------------------------------------------------------------------------------------------------------------------------------------------------------------------|----------------|
|                             |    | consistency.                                                                                                                                                                         |                |
| Risk of bias across studies | 22 | Present results of any assessment of risk of bias across studies (see Item 15).                                                                                                      | 9, Appendix II |
| Additional analysis         | 23 | Give results of additional analyses, if done (e.g., sensitivity or subgroup analyses, meta-regression [see Item 16]).                                                                | n/a            |
| <b>DISCUSSION</b>           |    |                                                                                                                                                                                      |                |
| Summary of evidence         | 24 | Summarize the main findings including the strength of evidence for each main outcome; consider their relevance to key groups (e.g., healthcare providers, users, and policy makers). | 9-11           |
| Limitations                 | 25 | Discuss limitations at study and outcome level (e.g., risk of bias), and at review-level (e.g., incomplete retrieval of identified research, reporting bias).                        | 12             |
| Conclusions                 | 26 | Provide a general interpretation of the results in the context of other evidence, and implications for future research.                                                              | 12             |
| <b>FUNDING</b>              |    |                                                                                                                                                                                      |                |
| Funding                     | 27 | Describe sources of funding for the systematic review and other support (e.g., supply of data); role of funders for the systematic review.                                           | 13             |

From: Moher D, Liberati A, Tetzlaff J, Altman DG, The PRISMA Group (2009). Preferred Reporting Items for Systematic Reviews and Meta-

For peer review only - <http://bmjopen.bmj.com/site/about/guidelines.xhtml>

1 Bose G, et al. Direct oral anticoagulants in treatment of cerebral venous thrombosis: systematic review. *PRISMA Checklist*  
2 Analyses: The PRISMA Statement. PLoS Med 6(7): e1000097. doi:10.1371/journal.pmed1000097  
3

4 For more information, visit: [www.prisma-statement.org](http://www.prisma-statement.org).  
5  
6  
7  
8  
9  
10  
11  
12  
13  
14  
15  
16  
17  
18  
19  
20  
21  
22  
23  
24  
25  
26  
27  
28  
29  
30  
31  
32  
33  
34  
35  
36  
37  
38  
39  
40  
41  
42  
43  
44  
45  
46  
47

For peer review only

# BMJ Open

## Direct oral anticoagulants in treatment of cerebral venous thrombosis: systematic review

|                                 |                                                                                                                                                                                                                                                                                                                                                                                                                                                                                                                                                                                                                                                                                    |
|---------------------------------|------------------------------------------------------------------------------------------------------------------------------------------------------------------------------------------------------------------------------------------------------------------------------------------------------------------------------------------------------------------------------------------------------------------------------------------------------------------------------------------------------------------------------------------------------------------------------------------------------------------------------------------------------------------------------------|
| Journal:                        | <i>BMJ Open</i>                                                                                                                                                                                                                                                                                                                                                                                                                                                                                                                                                                                                                                                                    |
| Manuscript ID                   | bmjopen-2020-040212.R1                                                                                                                                                                                                                                                                                                                                                                                                                                                                                                                                                                                                                                                             |
| Article Type:                   | Original research                                                                                                                                                                                                                                                                                                                                                                                                                                                                                                                                                                                                                                                                  |
| Date Submitted by the Author:   | 08-Dec-2020                                                                                                                                                                                                                                                                                                                                                                                                                                                                                                                                                                                                                                                                        |
| Complete List of Authors:       | Bose, Gauruv; University of Ottawa, Neurology<br>Graveline, Justin; University of Ottawa, Neurology<br>Yogendrakumar, Vignan; The Ottawa Hospital Research Institute, Neurology<br>Shorr , Risa; Ottawa Hospital<br>Fergusson, Dean; Ottawa Hospital Research Institute, Medicine<br>Le Gal, Gregoire; University of Ottawa, Hematology<br>Coutinho, Jonathan; University of Amsterdam, Department of Neurology<br>Mendonca, Marcelo; Centro Hospitalar de Lisboa Ocidental EPE, Neurology<br>Viana-Baptista, Miguel; Centro Hospitalar de Lisboa Ocidental EPE, Neurology<br>Nagel, Simon; University of Heidelberg, Neurology<br>Dowlatsahi, Dar; The Ottawa Hospital, Neurology |
| <b>Primary Subject Heading</b>: | Neurology                                                                                                                                                                                                                                                                                                                                                                                                                                                                                                                                                                                                                                                                          |
| Secondary Subject Heading:      | Evidence based practice, Epidemiology                                                                                                                                                                                                                                                                                                                                                                                                                                                                                                                                                                                                                                              |
| Keywords:                       | Stroke < NEUROLOGY, Stroke medicine < INTERNAL MEDICINE, Anticoagulation < HAEMATOLOGY, EPIDEMIOLOGY                                                                                                                                                                                                                                                                                                                                                                                                                                                                                                                                                                               |
|                                 |                                                                                                                                                                                                                                                                                                                                                                                                                                                                                                                                                                                                                                                                                    |

SCHOLARONE™  
Manuscripts



I, the Submitting Author has the right to grant and does grant on behalf of all authors of the Work (as defined in the below author licence), an exclusive licence and/or a non-exclusive licence for contributions from authors who are: i) UK Crown employees; ii) where BMJ has agreed a CC-BY licence shall apply, and/or iii) in accordance with the terms applicable for US Federal Government officers or employees acting as part of their official duties; on a worldwide, perpetual, irrevocable, royalty-free basis to BMJ Publishing Group Ltd ("BMJ") its licensees and where the relevant Journal is co-owned by BMJ to the co-owners of the Journal, to publish the Work in this journal and any other BMJ products and to exploit all rights, as set out in our [licence](#).

The Submitting Author accepts and understands that any supply made under these terms is made by BMJ to the Submitting Author unless you are acting as an employee on behalf of your employer or a postgraduate student of an affiliated institution which is paying any applicable article publishing charge ("APC") for Open Access articles. Where the Submitting Author wishes to make the Work available on an Open Access basis (and intends to pay the relevant APC), the terms of reuse of such Open Access shall be governed by a Creative Commons licence – details of these licences and which [Creative Commons](#) licence will apply to this Work are set out in our licence referred to above.

Other than as permitted in any relevant BMJ Author's Self Archiving Policies, I confirm this Work has not been accepted for publication elsewhere, is not being considered for publication elsewhere and does not duplicate material already published. I confirm all authors consent to publication of this Work and authorise the granting of this licence.

1  
2  
3 Direct oral anticoagulants in treatment of cerebral venous thrombosis: systematic review  
4

5 Gauruv Bose<sup>1</sup>, Justin Graveline<sup>1</sup>, Vignan Yogendrakumar<sup>1</sup>, Risa Shorr<sup>1</sup>, Dean Fergusson<sup>1</sup>,  
6  
7 Gregoire Le Gal<sup>1</sup>, Jonathan M. Coutinho<sup>2</sup>, Marcelo Mendonça<sup>3</sup>, Miguel Viana-Baptista<sup>3</sup>, Simon  
8  
9 Nagel<sup>4</sup>, and Dar Dowlatshahi<sup>1</sup>  
10  
11  
12  
13

14  
15 1. Department of Medicine, University of Ottawa and The Ottawa Hospital Research Institute,  
16  
17 Ottawa, Canada  
18

19 2. Department of Neurology, University Medical Center, Amsterdam, Netherlands  
20

21 3. Department of Neurology, Centro Hospitalar de Lisboa Ocidental, Lisbon, Portugal  
22

23  
24 4. Department of Neurology, University Hospital, University of Heidelberg, Heidelberg,  
25  
26 Germany  
27  
28  
29  
30

31 **Key words:** Direct-Acting Oral Anticoagulants, Intracranial thrombosis, Systematic review,  
32  
33 Venous Brain Infarction, Venous Thrombosis  
34  
35  
36  
37

38 **Word count:** Abstract (267), Total Manuscript (3707)  
39

40 Tables: 2, Figures: 3, Supplemental information: Yes  
41  
42  
43  
44

45 **Corresponding Author:** Gauruv Bose, MD.  
46

47 Department of Medicine, Division of Neurology. University of Ottawa and The Ottawa Hospital  
48  
49 Research Institute. 1053 Carling Avenue, Room C2196. Ottawa ON, K1Y 4E9.  
50

51 Email: gauruvbose@gmail.com  
52  
53  
54  
55  
56  
57  
58  
59  
60



## ABSTRACT

**Objectives** Current guidelines do not recommend direct oral anticoagulants (DOAC) to treat cerebral venous thrombosis (CVT) despite their benefits over standard therapy. We performed a systematic review to summarize the published experience of DOAC therapy in CVT.

**Data sources** MEDLINE, EMBASE, and COCHRANE databases up to November 18, 2020.

**Eligibility criteria** All published articles of patients with CVT treated with DOAC were included. Studies without follow-up information were excluded.

**Data extraction and synthesis** Two independent reviewers screened articles and extracted data. A risk of bias analysis was performed.

**Primary and secondary outcome measures** Safety data included mortality, intracranial hemorrhage (ICH), or other adverse events. Efficacy data included recurrent CVT, recanalization rates, and disability by modified Rankin Scales (mRS).

**Results** 33 studies met inclusion criteria. One randomized controlled trial, 5 observational cohorts, and 27 case series or studies reported 279 patients treated with DOAC for CVT: 41% dabigatran, 47% rivaroxaban, 10% apixaban, and 2% edoxaban, in addition to 315 patients treated with standard therapy. The observational cohorts showed a similar risk of death in DOAC and standard therapy arms (RR 2.12, 95%CI 0.29-15.59). New ICH was reported in 2 (0.7%) DOAC-treated patients and recurrent CVT occurred in 4 (1.5%). A favourable mRS between 0 and 2 was reported in 94% of DOAC-treated patients, more likely than standard therapy in observational cohorts (RR 1.13, 95% CI: 1.02-1.25).

**Conclusion** The evidence for DOAC use in CVT is limited although suggests sufficient safety and efficacy despite variability in timing and dose of treatment. This systematic review

1  
2  
3 highlights that further rigorous trials are needed to validate these findings and to determine  
4  
5 optimal treatment regimens.  
6

7  
8 **PROSPERO ID:** CRD42017078398  
9

## 10 11 12 **Article Summary**

### 13 14 **Strengths and limitations of the study**

- 15  
16 - We performed an all-encompassing review of patients treated with DOAC for CVT.
- 17  
18 - Given the heterogeneity of the literature, a risk of bias analysis was performed.
- 19  
20 - We compared DOAC and standard therapy in one RCT and 5 observational cohorts
- 21  
22 - Meta-analysis comparing different DOACs was not possible and is a limitation of this study.  
23  
24  
25  
26  
27  
28  
29  
30  
31  
32  
33  
34  
35  
36  
37  
38  
39  
40  
41  
42  
43  
44  
45  
46  
47  
48  
49  
50  
51  
52  
53  
54  
55  
56  
57  
58  
59  
60

## INTRODUCTION

Cerebral venous thrombosis (CVT) requires rapid treatment to prevent neurologic disability or death due to venous infarct and hemorrhage. The estimated incidence is 1 per 100 000 per year with a mean age of onset 39 years.[1] Although the mortality rate has reduced to 5-15% due to advances in detection and treatment, morbidity rates can reach as high as 20-30%.[2] A Cochrane review in 2011 showed anticoagulation to be safe in CVT and was associated with a reduction in death prompting international guidelines to recommend acute treatment of CVT with either unfractionated heparin (UFH) or low-molecular-weight heparin (LMWH).[3–6] Longer term anticoagulation is required since recurrent venous thromboembolism (VTE) is highest within the first year of CVT.[7] Thus, at least 3 months of ongoing anticoagulation in low risk patients and indefinitely for unprovoked, high risk patients, or those with malignancy, is recommended.[6,8] The transition from acute treatment of CVT with LMWH or UFH to an oral anticoagulant, such as warfarin, is standard practice despite no randomized controlled trial (RCT) comparing warfarin with UFH or LMWH.

Direct oral anticoagulants (DOAC) were introduced to treat symptomatic VTE over the past 10 years and have advantages over warfarin: more predictable pharmacokinetics, no international normalized ratio (INR) monitoring requirement or daily dose adjustments, while demonstrating similar efficacy in treatment of acute VTE with lower rates of intracranial hemorrhage (ICH).[9] Guideline recommendations, however, do not support DOAC treatment for CVT given the paucity of evidence.[6] Recent larger studies on

1  
2  
3 DOAC therapy for VTE in atypical locations included CVT, thus assessment of the  
4 appropriateness of these anticoagulants for the treatment of CVT is warranted.[10–12]  
5  
6  
7  
8  
9

10 The objective of this study was to review all available evidence to assess data on safety  
11 and efficacy of direct oral anticoagulants in the treatment of CVT.  
12  
13  
14  
15

## 16 **METHODS**

### 17 **Search Strategy and Selection Criteria**

18  
19 The protocol for this systematic review was registered (PROSPERO ID:  
20 CRD42017078398)[13] and published[14]. We followed PRISMA-P[15], PRISMA[16],  
21 and SWiM[17] guidelines where applicable. The search strategy was iteratively  
22 developed with assistance of a research librarian (RS) and is available in the supplement  
23 (Appendix I). We searched Ovid MEDLINE, EMBASE, and the Cochrane Central  
24 Register of Controlled Trials for original reports of patients with a diagnosis of CVT  
25 treated with a DOAC up to November 18, 2020. We included all available peer-reviewed  
26 studies including RCTs, prospective or retrospective observational cohorts, case series  
27 and case studies. Studies without follow-up data were excluded. Two authors (GB, JG)  
28 independently reviewed titles and abstracts for inclusion.  
29  
30  
31  
32  
33  
34  
35  
36  
37  
38  
39  
40  
41  
42  
43  
44  
45  
46

### 47 **Data items**

48  
49 Study type and number of patients were collected. Patient data included age, sex, and  
50 medical history; CVT information included location of venous thrombosis, and  
51 intracranial hemorrhage; and DOAC data included type, dosage, timing of initiation after  
52  
53  
54  
55  
56  
57  
58  
59  
60

1  
2  
3 immediate therapy, and duration of treatment. Safety outcomes included mortality,  
4 occurrence of intracranial and extracranial bleeding as defined by authors, and any other  
5 reported adverse events. Efficacy outcomes included recurrent CVT, recanalization rates,  
6 and disability measured by the modified Rankin Scale (mRS). The mRS is a 6-point scale  
7 ranging from 0 (no symptoms), to 6 (death), with a score of 2 indicating slight disability  
8 but able to look after own affairs without assistance.[18] When applicable, authors were  
9 contacted for further data.  
10  
11  
12  
13  
14  
15  
16  
17  
18  
19  
20

### 21 **Risk of bias analysis**

22 We used the Cochrane Risk of Bias Tool for randomized trials[19]; the Newcastle Ottawa  
23 Scale for observational cohorts[20]; and Joanna Briggs Institute (JBI) Critical Appraisal  
24 Checklist for case studies and case series.[21] The Grading of Recommendations,  
25 Assessment, Development and Evaluations (GRADE) framework was utilized to assess  
26 the certainty of absolute treatment effects.[22]  
27  
28  
29  
30  
31  
32  
33  
34  
35  
36  
37

### 38 **Statistical analysis**

39 Data was reported as counts and proportions for dichotomous data, medians and ranges  
40 for non-normally distributed continuous data, or means with standard deviation (SD) for  
41 normally distributed continuous data. We reported risk ratios (RR) with 95% confidence  
42 intervals (CI) and study heterogeneity ( $I^2$ ) wherever possible. Case series and case report  
43 outcomes are presented as pooled descriptive statistics for each DOAC. Statistics were  
44 performed using STATA/IC 15.1 and RevMan 5.4.1.  
45  
46  
47  
48  
49  
50  
51  
52  
53  
54  
55  
56  
57  
58  
59  
60

## Patient and public involvement

This systematic review had no individual patient involvement.

## RESULTS

### Search results

Of 1843 titles, 33 studies met inclusion criteria (Figure 1), representing 279 patients with CVT treated with a DOAC listed in Table 1. We identified one RCT consisting of 60 patients treated with dabigatran and 60 patients treated with warfarin[23]; 5 observational cohorts of 101 patients treated with rivaroxaban (n=80), dabigatran (n=11), and apixaban (n=10) compared to warfarin (n=301) or LMWH (n=14) [24–28]; 6 case series of patients treated with rivaroxaban (n=44), dabigatran (n=36), and apixaban (n=13) [29–34]; and 21 case studies of rivaroxaban (n=8), dabigatran (n=8), apixaban (n=4), and edoxaban (n=5).[35–55] The clinical characteristics and outcomes of the patients are listed in Table 2.

### Dabigatran

A total of 115 patients (41.2%) were treated with dabigatran. In a multicenter open-label blinded end-point RCT by Ferro *et al.*, RE-SPECT CVT[23], patients were initially treated with LMWH or UFH for 5-15 days, followed by dabigatran 150mg BID for 24 weeks. No patient died in the study. No new ICH occurred in the dabigatran group, while two occurred in the warfarin group. There were 7 patients (11.7%) who discontinued dabigatran due to adverse events: one for worsening CVT-related baseline ICH, one intestinal hematoma, and 5 non-bleeding adverse events. None of the 4 (6.7%) patients

1  
2  
3 who discontinued warfarin did so due to adverse events. Follow-up data on 55  
4  
5 dabigatran-treated patients showed no radiographic CVT improvement in 40%, compared  
6  
7 with 33% treated with warfarin (RR 1.22, 95%CI 0.74-2.03,  $p=.44$ ). At 24 weeks, a  
8  
9 favourable mRS of 0 to 2 was reported in 58 of 59 (98.3%) in the dabigatran group and  
10  
11 56 of 58 (96.6%) in the warfarin group ( $p=.62$ ).  
12  
13  
14

15  
16  
17 Descriptive studies of dabigatran reported an additional 44 patients. A case series by  
18  
19 Mendonça *et al.* provided patient-level data upon request for 18 patients treated initially  
20  
21 with UFH for a median 13 days followed by dabigatran for a median 6 months, 150mg  
22  
23 BID in 16 patients (89%) and 110mg BID in 2 patients (11%).[33] No deaths or ICH  
24  
25 were reported, though one patient (6%) had a major intestinal bleed and one (6%) had  
26  
27 minor intestinal bleed. At 6 months, mRS of 0 or 1 was reported in 15 patients (83%) and  
28  
29 one (6%) had mRS of 3 (moderate disability, dependent on others but can walk). Rusin *et*  
30  
31 *al.* reported pooled data on 18 patients with dabigatran, 150mg BID in 16 and 110mg  
32  
33 BID in 2, as well as rivaroxaban 20mg daily in 10, and apixaban 5mg BID in 8 patients  
34  
35 treated for a median of 8.5 months.[31] During the 30-month follow-up, no death or ICH  
36  
37 was reported but 3 (8.3%) had major bleeding. Recurrent CVT occurred in 2 (5.6%) at 5  
38  
39 and 20 months after DOAC completion. Complete recanalization occurred in 10 on  
40  
41 dabigatran (55.6%), 6 on rivaroxaban (60.0%) and 6 on apixaban (50.0%). At 6-12  
42  
43 months after CVT, an excellent mRS of 0 or 1 was reported in 24 patients (66.7%),  
44  
45 independent mRS of 2 in 10 (27.8%), and two (5.6%) had significant disability. Case  
46  
47 studies of dabigatran reported one new ICH due to development of a dural arteriovenous  
48  
49 fistula (DAVF) despite a reportedly complete recanalization of their CVT[37], and one  
50  
51  
52  
53  
54  
55  
56  
57  
58  
59  
60

1  
2  
3 myocardial infarction in the context of double thrombophilia from both PAI-1 4G/4G  
4  
5 homozygous genotype and Protein C and S deficiency, and required transition to  
6  
7 warfarin.[39] Otherwise, no patient had reported mortality and all 8 case studies reported  
8  
9 an mRS of 0 or 1 after treatment.[37–39,52–55]  
10  
11  
12  
13

### 14 **Rivaroxaban**

15  
16 A total of 132 patients (47.3%) were treated with rivaroxaban. Five observational cohorts  
17  
18 pooled 101 DOAC-treated patients, 80 (79%) on rivaroxaban, 11 (11%) on dabigatran  
19  
20 150mg BID, and 10 (10%) on apixaban, compared with 315 on standard therapy with 301  
21  
22 (96%) warfarin and 14 (4%) LMWH.[24–28] Patients were treated with DOAC for an  
23  
24 average 8.1 months and with standard therapy for 9.8 months. Deaths were reported in 4  
25  
26 patients treated with a DOAC compared with 6 on standard therapy (RR 2.12, 95%CI  
27  
28 0.29-15.59,  $p=.46$ ,  $I^2 = 49\%$ ) (Figure 2). Hsu *et al.* reported two deaths after DOAC  
29  
30 therapy (25%): one in hospital from respiratory failure post-aspiration in a patient treated  
31  
32 with apixaban, and another due to metastatic lung cancer one year after CVT.[24] Wasay  
33  
34 *et al.* reported 2 deaths in their DOAC group (4%): one prior to discharge and one prior  
35  
36 to 6-month follow-up; and 4 deaths in their warfarin group (6%): 3 prior to discharge, and  
37  
38 1 prior to 6-month follow-up.[27] The causes of death were not reported. Herweh *et al.*  
39  
40 reported two deaths in their cohort (2%), and upon request for patient-level data, none  
41  
42 were treated with a DOAC.[28] No significant difference between DOAC or standard  
43  
44 therapy was reported for ICH (1% vs. 2.5%, RR 0.72, 95%CI 0.18-2.85,  $p=.64$ ,  $I^2=0\%$ ),  
45  
46 recurrent CVT (5.7% vs. 11.7%, RR 0.45, 95%CI 0.05-4.40,  $p=.49$ ,  $I^2=54\%$ ), or  
47  
48 incomplete recanalization (35.8% vs. 26.5%, RR 0.84, 95%CI 0.58-1.21,  $p=.35$ ,  $I^2=0\%$ )  
49  
50  
51  
52  
53  
54  
55  
56  
57  
58  
59  
60



1  
2  
3 available in the supplement (Appendix II). A favourable functional outcome of mRS 0-2  
4  
5 was reported in 61 of 69 (88.4%) DOAC-treated patients compared to 126 of 156  
6  
7 (80.7%) on standard therapy (RR 1.13, 95%CI 1.02-1.25,  $p=.02$ ,  $I^2=0\%$ ) (Figure 3).  
8  
9

10  
11  
12 Descriptive studies of rivaroxaban reported an additional 52 patients. A case series by  
13  
14 Shankar Iyer *et al.* treated 20 stable patients with rivaroxaban acutely at 15mg BiD for 3  
15  
16 weeks followed by 20mg daily.[30] At 6-month follow-up, no patient died or  
17  
18 discontinued rivaroxaban. There was no ICH or adverse effects reported. There was  
19  
20 recanalization in all patients and 19 (95%) reported mRS of 0 or 1, with mRS of 2 in only  
21  
22 one (5%). Other case series and studies of rivaroxaban reported no mortality or ICH, and  
23  
24 all had mRS 0 or 1 at follow-up.[32,34–36,47–51] The dosing of rivaroxaban was  
25  
26 variable: most received 20mg daily after initial standard therapy[32], one with  
27  
28 antiphospholipid syndrome received 15mg daily after suffering a stroke with hemorrhagic  
29  
30 transformation 3 months after starting warfarin for CVT[35], two received 10mg daily in  
31  
32 the context of Crohn's disease[49] and pegylated asparaginase for acute lymphoblastic  
33  
34 leukemia[48], and one was treated with 5mg daily, in conjunction with PLEX, for  
35  
36 concurrent anti-NMDA receptor encephalitis.[50] One patient was initially treated with  
37  
38 rivaroxaban 15mg BiD and was then switched to dabigatran due to low anti-Xa levels in  
39  
40 the context of concurrent phenytoin use for seizures secondary to CVT.[52]  
41  
42  
43  
44  
45  
46  
47  
48

### 49 **Apixaban**

50  
51 Apixaban has been reported in 27 patients (9.7%).[29,40,41] In the series reported by  
52  
53 Covut *et al.*, 5 patients were treated with apixaban and 4 with rivaroxaban after a median  
54  
55  
56  
57  
58  
59  
60

1  
2  
3 3 days of UFH and continued for a median of 12 months. No patient died or had new ICH  
4 during the follow-up, nor switched off their DOAC. One patient was switched onto  
5 apixaban due to gastrointestinal bleeding on warfarin and another was switched onto  
6 rivaroxaban 30 days after starting warfarin due to INR fluctuations. No recanalization  
7 was reported in 3 patients (60%) on apixaban and 1 patient (25%) on rivaroxaban. At 6-  
8 month follow-up, mRS was 0 or 1 in 8 patients (89%) and 1 patient had persistent mRS  
9 of 4 (unable to walk unassisted). The other case studies of apixaban indicate that all 4  
10 patients had mRS of 0-1 after treatment, with no mortality or new ICH. Apixaban dosing  
11 was 5mg BiD for all patients, though one received 10mg BiD initially for 7 days in the  
12 context of T cell acute lymphoblastic leukemia treated with pegylated asparaginase.[40]  
13  
14  
15  
16  
17  
18  
19  
20  
21  
22  
23  
24  
25  
26  
27

### 28 **Edoxaban**

29  
30 Edoxaban was reported in case studies of 5 patients (1.8%).[37–41] No death, ICH,  
31 recurrent CVT or incomplete recanalization was reported and all patients had a good  
32 functional outcome. Two of the reported patients developed CVT in the context of  
33 Coronavirus Disease 2019 (COVID-19) infection and recovered without neurologic  
34 sequelae.[45,46]  
35  
36  
37  
38  
39  
40  
41  
42  
43

### 44 **Risk of bias**

45  
46 The risks of bias analyses are available in the supplement (Appendix III). In RE-SPECT  
47 CVT, patients and treating teams were aware of treatment allocation.[23] No  
48 observational cohort controlled for confounders. Treatment initiation time was not  
49 reported in two observational cohorts and follow-up duration was not  
50  
51  
52  
53  
54  
55  
56  
57  
58  
59  
60

1  
2  
3 standardized.[24,26] The case series and case studies are moderately biased based on JBI  
4  
5 Critical Appraisal, given lack of reporting completeness. Based on the currently available  
6  
7 studies, the GRADE certainty is low for the absolute treatment effect.  
8  
9

## 10 11 12 **DISCUSSION**

13  
14 We found that since the approval of DOAC for treatment of VTE, 279 patients treated  
15  
16 with DOAC for CVT have been published with follow-up data. Of these patients, 42%  
17  
18 are reported in case studies or case series, 36% in five observational cohorts, and 22% in  
19  
20 one RCT. There were 200 patients (72%) published in 2019 and 2020, suggesting that  
21  
22 practitioner comfort for DOAC use in CVT is improving despite a lack of guideline  
23  
24 recommendations.[6] A recent survey of Canadian neurologists and hematologists  
25  
26 suggests interest in the utilization of DOAC for treatment of CVT, and the increasing  
27  
28 reports support this trend.[56]  
29  
30  
31  
32  
33  
34

### 35 **Outcomes of DOAC compared with standard therapy**

36  
37 Currently, warfarin is supported by guidelines despite no RCT evidence of superiority or  
38  
39 non-inferiority to LMWH or UFH. The benefits of the DOAC over warfarin include  
40  
41 reduced dose adjustments due to drug and food interactions, no need for INR monitoring  
42  
43 to ensure therapeutic range, and in the case of dabigatran, the availability of a reversal  
44  
45 agent. Furthermore, even when closely monitored in a clinical trial setting, patients on  
46  
47 warfarin for CVT were in the therapeutic INR range only 66% of the time[23],  
48  
49 suggesting better anticoagulation may be achieved with DOAC. Overall safety of DOAC  
50  
51 was reassuring, with recurrent CVT, new ICH and death only reported in observational  
52  
53  
54  
55  
56  
57  
58  
59  
60

1  
2  
3 cohorts at rates similar to standard therapy and within the expected range of treated  
4  
5 CVT.[2] Furthermore, of the DOAC-treated patients who died, 2 of 4 deaths occurred  
6  
7 after discharge, including one related to underlying metastatic cancer that would not  
8  
9 suggest DOAC-related mortality.[24] Efficacy was also promising with 93% of DOAC-  
10  
11 treated patients attaining a favourable outcome of mRS from 0 to 2 compared with 85%  
12  
13 of those on standard therapy. Compared with standard therapy in the observational  
14  
15 cohorts, this value was higher for DOAC-treated patients. However, utilization of DOAC  
16  
17 in less severe CVT cannot be ruled out as a confounding factor since the observational  
18  
19 cohorts did not have comparable standard treatment groups.  
20  
21  
22  
23  
24  
25

26 A meta-analysis published by Lee *et al.* showed similar results to our review with no  
27  
28 difference between DOAC or warfarin for recanalization rates or major bleeding,  
29  
30 however their review analyzed an “excellent” mRS outcome of 0 to 1 and found no  
31  
32 difference, while our study analyzed a “favourable” mRS of 0 to 2 and found a difference  
33  
34 in the observational cohorts.[57] The dichotomy of a favourable mRS has been debated,  
35  
36 with mRS greater than 2 shown to be related to 1-year mortality, as well as being an  
37  
38 independence cut-off for entry to certain endovascular trials.[58–60] The apparent  
39  
40 discrepancy may also relate to two of their analyzed observational cohort studies  
41  
42 (Geisbüsch *et al.* and Herweh *et al.*) potentially including patients from the same  
43  
44 institution during overlapping time periods (January 2012 to December 2013 and January  
45  
46 1998 to September 2014, respectively).[28,61] To clarify, we were able to contact the  
47  
48 authors from these studies and obtain patient-level data, which led to the exclusion of  
49  
50  
51  
52  
53  
54  
55  
56  
57  
58  
59  
60

1  
2  
3 Geisbüsch *et al.* due to duplicate patient data. Furthermore, we have updated the search to  
4  
5 include an additional two cohorts published in 2020.  
6  
7

8  
9  
10 An ongoing RCT out of University of British Columbia, the “Study of Rivaroxaban for  
11  
12 CeREbral Venous Thrombosis” (SECRET, NCT03178864), is currently recruiting an  
13  
14 estimated 50 participants comparing rivaroxaban with standard anticoagulation of  
15  
16 LMWH, UFH, or warfarin, expected to be completed December 2021.[62] Another RCT,  
17  
18 “Rivaroxaban vs. Warfarin in CVT Treatment” (RWCVT, NCT NCT04569279) out of  
19  
20 Damascus University has completed enrollment of 71 patients though not yet published  
21  
22 results.[63] Results of these studies will be useful for future guideline recommendations  
23  
24 for DOAC use in CVT compared with standard therapy.[6]  
25  
26  
27  
28  
29

### 30 31 **Comparison between different DOAC**

32  
33 Our search yielded no randomized trials comparing different DOAC against each other,  
34  
35 thus no formal meta-analysis comparing different DOAC was possible. Dabigatran was  
36  
37 compared against warfarin in the only published RCT specifically looking at CVT to-  
38  
39 date; however, the most commonly reported DOAC was rivaroxaban, possibly suggesting  
40  
41 physician comfort with this medication. Results from RWCVT and SECRET will help  
42  
43 validate safety and efficacy of rivaroxaban and allow more definitive comparison with  
44  
45 dabigatran from RE-SPECT CVT.[62]  
46  
47  
48  
49

50  
51 The timing of DOAC initiation after acute treatment with LMWH or UFH ranged from 5  
52  
53 to 15 days for the RCT and from 3 to 12 days for the observational cohorts. The  
54  
55  
56  
57  
58  
59

1  
2  
3 descriptive studies had more variability in DOAC initiation, ranging from acutely after  
4  
5 CVT diagnosis, to as far as 3 months, making comparisons challenging. The dosage of  
6  
7 DOAC was also inconsistent, with dabigatran dose ranging from 75mg to 150mg BiD in  
8  
9 the cohort by Wasay *et al.*, and rivaroxaban dosing between 5mg daily to 20mg daily  
10  
11 depending on the study. Both ongoing RCTs utilize rivaroxaban after initial acute therapy  
12  
13 with LMWH or UFH, for SECRET 20mg daily within 14 days of CVT diagnosis, and for  
14  
15 RWCVT 20mg or 15mg, depending on creatinine clearance, after a non-specified  
16  
17 duration of acute therapy. These and future trials should help standardize how long initial  
18  
19 therapy with LMWH or UFH is needed, if at all, prior to using DOAC, as well as if initial  
20  
21 dosage adjustments are needed.  
22  
23  
24  
25  
26  
27

28 There were rare adverse events with each DOAC therapy. For dabigatran no deaths were  
29  
30 reported and of the patients who experienced bleeding, none were given the reversal  
31  
32 agent. However, in RE-SPECT CVT, dabigatran was stopped in two patients due to  
33  
34 intestinal hematoma and worsening of the hemorrhagic component of their baseline  
35  
36 intracranial lesion.[23] Bleeding events on rivaroxaban were only reported in the series  
37  
38 by Rusin *et al.* in 3 patients (8.3%), two on 20mg daily rivaroxaban and one on 110mg  
39  
40 BID dabigatran, who had heavy menstrual bleedings in two and upper gastrointestinal  
41  
42 bleeding in one.[31] Other rare adverse events include the in-hospital death of a patient  
43  
44 treated with apixaban who had an aspiration event and respiratory failure[24], myocardial  
45  
46 infarction while on dabigatran[39], and dural arteriovenous fistulae (dAVF) formation 3  
47  
48 months after CVT despite complete recanalization with dabigatran.[37] A post-hoc  
49  
50 analysis of the RE-SPECT CVT showed no dAVF formation at 6 months.[64] Two case  
51  
52  
53  
54  
55  
56  
57  
58  
59  
60

1  
2  
3 studies of edoxaban treated patients with CVT in the context of COVID-19.[45,46]  
4  
5 Thrombotic complications of COVID-19 has been reported, but the safety and efficacy of  
6  
7 DOAC in COVID-19 related thrombosis specifically has yet to be confirmed.[65,66]  
8  
9

10  
11  
12 The efficacy of each DOAC was good for treatment of CVT. Recurrent CVT was only  
13  
14 reported in 4 patients overall (1.5%), 2 patients from the cohort Powell *et al.* (11%), and  
15  
16 2 in the case series Rusin *et al.* (5.6%) after discontinuation of DOAC.[25,31] An  
17  
18 international long-term cohort found the rate of recurrent CVT is as high as 4.4% at  
19  
20 median 40 months, therefore long-term follow up of DOAC-treated CVT is needed to  
21  
22 determine the ideal treatment duration.[67] Recanalization rates varied between DOAC  
23  
24 treatment at similar rates reported in randomized trials of LMWH and UFH to treat  
25  
26 CVT[3–5] without clear reduction of a favourable functional outcome, as previously  
27  
28 demonstrated.[28] However, the prognostic value of recanalization has been investigated  
29  
30 by a meta-analysis of standard therapy, which showed recanalization occurred in up to  
31  
32 85% of patients and was associated with mRS 0 or 1 (odds ratio 3.3, 95% CI, 1.7–6.3,  
33  
34  $p=.001$ ).[68] Further high quality studies will be required to determine if recanalization  
35  
36 rates differ between DOACs, as well as if they are related to functional outcome.  
37  
38  
39  
40  
41  
42  
43

#### 44 **Limitations**

45  
46  
47 The results of this systematic review should be interpreted with caution. The majority of  
48  
49 patients were reported in retrospective observational cohorts or case studies prone to  
50  
51 selection bias, confounding, and lack of standardization in timing of therapy initiation  
52  
53 and follow-up duration. Therefore, pooling and inferential statistical analysis was not  
54  
55  
56  
57  
58  
59  
60

1  
2  
3 prudent due to the clinical and methodological heterogeneity and conclusions as to how  
4 DOAC therapies perform against each other could not be made. The risk of bias analysis  
5 revealed that RE-SPECT CVT has the lowest bias risk given utilization of a PROBE  
6 design, and although the retrospective studies inherently have increased bias, most  
7 studies were appropriately informative. Finally, follow-up data and treatment duration  
8 were limited to a median 6 months; longer-term registries for safety will be needed to  
9 estimate rates of recurrent CVT in patients treated with a DOAC.  
10  
11  
12  
13  
14  
15  
16  
17  
18  
19  
20

### 21 **Unanswered questions and future research**

22 Our systematic review suggests physicians are increasingly using DOAC for the  
23 treatment of CVT; however, several remaining questions require further study. The ideal  
24 time to start a DOAC after diagnosis of CVT is not known. Certain studies first use  
25 LMWH or UFH treatment, while others used a DOAC acutely. The safety of DOAC use  
26 in children is not known. The recently published RCT, EINSTEIN-JR, investigated  
27 pediatric cases of any acute VTE and randomized to weight-based rivaroxaban or  
28 standard anticoagulation showed potentially improved thrombotic burden (OR 1.70,  
29  $p=.012$ ) and similar safety as adult studies.[69] Specific outcomes were not reported  
30 based on VTE location, however 74 of 335 (22%) patients treated with rivaroxaban had  
31 CVT and no clear safety concern was identified. Finally, the ideal DOAC to use for CVT  
32 also requires further study. Results from RWCVT and SECRET will help validate safety  
33 and efficacy of rivaroxaban and allow more definitive comparison with dabigatran from  
34 RE-SPECT CVT.[62] Although dabigatran has the advantage of having a reversal agent,  
35 idaricizumab, its use in CVT has not been published at the current time, so any unique  
36  
37  
38  
39  
40  
41  
42  
43  
44  
45  
46  
47  
48  
49  
50  
51  
52  
53  
54  
55  
56  
57  
58  
59  
60



1  
2  
3 risks in this population is unknown.[70] Extrapolating conclusions for apixaban or  
4  
5 edoxaban from studies of different DOAC may give an inaccurate risk-efficacy profile,  
6  
7 and thus high quality RCT of these treatments are also needed.  
8  
9

10  
11  
12 Given that CVT is a rare disease, enrollment in these large randomized studies is slow, so  
13  
14 review of observational cohorts and smaller studies provide needed information.  
15

16  
17 Physicians recognize the benefits of DOACs and are increasingly using these medications  
18  
19 for treatment of CVT despite the lack of guideline recommendations. Based on this  
20  
21 review, no clear safety concerns are identified for any particular DOAC, and the available  
22  
23 data on efficacy is promising. The ideal timing for initiation of DOAC after diagnosis of  
24  
25 CVT, and the ideal DOAC to use for CVT, are remaining questions. The results future  
26  
27 RCTs may inform guidelines if no adverse safety signal and a similar efficacy to standard  
28  
29 therapy is seen.  
30  
31  
32  
33  
34  
35  
36  
37  
38  
39  
40  
41  
42  
43  
44  
45  
46  
47  
48  
49  
50  
51  
52  
53  
54  
55  
56  
57  
58  
59  
60

1  
2  
3 **Authorship Details** G. Bose, J. Graveline, D. Dowlatshahi and R. Shorr developed the  
4 search strategy; G. Bose, J. Graveline, and D. Dowlatshahi reviewed articles for  
5 inclusion; G. Bose, D. Fergusson, and D. Dowlatshahi performed data analysis; V.  
6 Yogendrakumar assessed articles for risk of bias; G. Bose wrote the manuscript; G. Le  
7 Gal, J. Coutinho, M. Mendonça, M. Viana-Baptista and S. Nagel contributed expert  
8 opinion and revised research question and discussion; and all authors revised the  
9 manuscript for intellectual content and approved the final manuscript.  
10  
11  
12  
13  
14  
15  
16  
17  
18  
19  
20

21 **Funding statement** This research received no specific grant from any funding agency in  
22 the public, commercial or not-for-profit sectors  
23  
24  
25  
26  
27

### 28 **Competing interests**

29  
30 Dr. Bose: none

31  
32 Dr. Graveline: none

33  
34 Dr. Yogendrakumar: none

35  
36 Ms. Shorr: none

37  
38 Dr. Fergusson: none

39  
40  
41 Dr. Le Gal holds an Early Researcher Award from the Ontario Ministry of Research and  
42 Innovation (MRI); an Ontario Mid-Career Investigator Award from the Heart and Stroke  
43 Foundation of Canada; and a University of Ottawa, Faculty of Medicine Tier 1 Clinical  
44 Research Chair in Diagnosis of Venous Thromboembolism. He has indirectly received  
45 research funding from Portola, Boehringer-Ingelheim, Pfizer, Bristol-Myers Squibb, LEO  
46  
47  
48  
49  
50  
51  
52  
53  
54  
55  
56  
57  
58  
59  
60

Pharma, Daiichi Sankyo, Bayer. He has received speaker honoraria from Bayer, Pfizer, LEO Pharma, Sanofi bioMérieux.

Dr. Coutinho: has received research funding from the following non-profit organizations: Dutch Heart Foundation, Dutch Brain Foundation and Amsterdam Neuroscience. He has also received research support from Bayer, Boehringer and Portola. All fees were paid to his institute and used to fund medical research.

Dr. Mendonça: none

Dr. Viana-Baptista received speaker fees from Boehringer Ingelheim, Portugal, is part of an advisory board of Daiichi Sankyo, Portugal, and received a travel grant from Boehringer Ingelheim, Portugal.

Dr. Nagel: received consulting fees from Brainomix and Böhringer Ingelheim and Honoria for lectures from Bayer, BMS Pfizer and Medtronic.

Dr. Dowlatshahi received a Heart & Stroke Foundation of Canada Clinician Scientist Award, and has received honoraria from Bayer, BMS, and Apopharma.

**Patient and public involvement** Patients and/or the public were not involved in the design, or conduct, or reporting or dissemination plans of this research.

**Patient consent for publication** Not required.

**Provenance and peer review** Not commissioned; externally peer reviewed.

**Data availability statement** Extra data can be accessed via the Dryad data repository at <http://datadryad.org/> with the doi:10.5061/dryad.37pvmcvgn

## REFERENCES

- 1 Coutinho JM, Zuurbier SM, Aramideh M, *et al.* The Incidence of Cerebral Venous Thrombosis. *Stroke* 2012;**43**:3375–7. doi:10.1161/STROKEAHA.112.671453
- 2 Ferro JM, Canhão P, Stam J, *et al.* Prognosis of cerebral vein and dural sinus thrombosis: results of the International Study on Cerebral Vein and Dural Sinus Thrombosis (ISCVT). *Stroke* 2004;**35**:664–70. doi:10.1161/01.STR.0000117571.76197.26
- 3 Einhüpl KM, Villringer A, Mehraein S, *et al.* Heparin treatment in sinus venous thrombosis. *Lancet* 1991;**338**:597–600. doi:10.1016/0140-6736(91)90607-Q
- 4 de Bruijn SFTM, Stam J. Randomized, Placebo-Controlled Trial of Anticoagulant Treatment With Low-Molecular-Weight Heparin for Cerebral Sinus Thrombosis. *Stroke* 1999;**30**:484–8. doi:10.1161/01.STR.30.3.484
- 5 Coutinho J, de Bruijn SF, Deveber G, *et al.* Anticoagulation for cerebral venous sinus thrombosis. *Cochrane database Syst Rev* 2011;:CD002005. doi:10.1002/14651858.CD002005.pub2
- 6 Ferro JM, Boussier M-G, Canhão P, *et al.* European Stroke Organization guideline for the diagnosis and treatment of cerebral venous thrombosis - endorsed by the European Academy of Neurology. *Eur J Neurol* 2017;**24**:1203–13. doi:10.1111/ene.13381

- 1  
2  
3 7 Caprio F, Bernstein RA. Duration of anticoagulation after cerebral venous sinus  
4 thrombosis. *Neurocrit Care* 2012;**16**:335–42. doi:10.1007/s12028-011-9661-1  
5  
6  
7  
8 8 Kearon C, Akl EA. Duration of anticoagulant therapy for deep vein thrombosis  
9 and pulmonary embolism. *Blood* 2014;**123**:1794–801. doi:10.1182/blood-2013-12-  
10 512681  
11  
12  
13  
14 9 Mekaj YH, Mekaj AY, Duci SB, *et al.* New oral anticoagulants: their advantages  
15 and disadvantages compared with vitamin K antagonists in the prevention and  
16 treatment of patients with thromboembolic events. *Ther Clin Risk Manag*  
17 2015;**11**:967–77. doi:10.2147/TCRM.S84210  
18  
19  
20  
21  
22  
23 10 Ageno W, Beyer-Westendorf J, Garcia DA, *et al.* Guidance for the management of  
24 venous thrombosis in unusual sites. *J Thromb Thrombolysis* 2016;**41**:129–43.  
25 doi:10.1007/s11239-015-1308-1  
26  
27  
28  
29  
30 11 Janczak DT, Mimier MK, McBane RD, *et al.* Rivaroxaban and Apixaban for  
31 Initial Treatment of Acute Venous Thromboembolism of Atypical Location. *Mayo*  
32 *Clin Proc* 2018;**93**:40–7. doi:10.1016/j.mayocp.2017.10.007  
33  
34  
35  
36  
37 12 Mimier MK, Janczak DT, McBane RD, *et al.* Thrombosis of atypical location:  
38 how to treat patients in the era of direct oral anticoagulants? *Polish Arch Intern*  
39 *Med* Published Online First: 20 September 2018. doi:10.20452/pamw.4333  
40  
41  
42  
43 13 Bose G, Graveline J, Dowlatshahi D. Systematic review of direct oral  
44 anticoagulants in treatment of cerebral venous thrombosis. *PROSPERO* 2017.  
45  
46  
47  
48 14 Bose G, Graveline J, Yogendrakumar V, *et al.* Direct oral anticoagulants in  
49 treatment of cerebral venous thrombosis: a systematic review protocol. *Syst Rev*  
50 2019;**8**:99. doi:10.1186/s13643-019-1022-8  
51  
52  
53  
54  
55  
56  
57  
58  
59  
60

- 1  
2  
3 15 Moher D, Shamseer L, Clarke M, *et al*. Preferred reporting items for systematic  
4 review and meta-analysis protocols (PRISMA-P) 2015 statement. *Syst Rev*  
5  
6 2015;**4**:1. doi:10.1186/2046-4053-4-1  
7  
8  
9  
10 16 Liberati A, Altman DG, Tetzlaff J, *et al*. The PRISMA statement for reporting  
11 systematic reviews and meta-analyses of studies that evaluate healthcare  
12 interventions: explanation and elaboration. *BMJ*  
13 2009;**339**:b2700.<http://www.ncbi.nlm.nih.gov/pubmed/19622552>  
14  
15  
16  
17 17 Campbell M, McKenzie JE, Sowden A, *et al*. Synthesis without meta-analysis  
18 (SWiM) in systematic reviews: reporting guideline. *BMJ* 2020;:l6890.  
19 doi:10.1136/bmj.l6890  
20  
21  
22  
23  
24  
25  
26 18 van Swieten JC, Koudstaal PJ, Visser MC, *et al*. Interobserver agreement for the  
27 assessment of handicap in stroke patients. *Stroke* 1988;**19**:604–7.  
28  
29 doi:10.1161/01.STR.19.5.604  
30  
31  
32  
33 19 Higgins JPT, Altman DG, Gotzsche PC, *et al*. The Cochrane Collaboration’s tool  
34 for assessing risk of bias in randomised trials. *BMJ* 2011;**343**:d5928–d5928.  
35  
36 doi:10.1136/bmj.d5928  
37  
38  
39  
40 20 Wells G, Shea B, O’Connell D, *et al*. The Newcastle-Ottawa Scale (NOS) for  
41 assessing the quality of nonrandomised studies in meta-analyses. *Ottawa Ottawa*  
42 *Hosp Res Institute*; 2018  
43  
44  
45  
46  
47 [http://www.ohri.ca.proxy.bib.uottawa.ca/programs/clinical\\_epidemiology/oxford.as](http://www.ohri.ca.proxy.bib.uottawa.ca/programs/clinical_epidemiology/oxford.as)  
48  
49 *p*  
50  
51 21 Moola S, Munn Z, Tufanaru C, *et al*. Joanna Briggs Institute Reviewer’s Manual.  
52  
53 *Joanna Briggs Inst* 2017;**Chapter 7**:  
54  
55  
56  
57  
58  
59  
60

- 1  
2  
3 22 Guyatt G, Oxman AD, Sultan S, *et al.* GRADE guidelines: 11. Making an overall  
4 rating of confidence in effect estimates for a single outcome and for all outcomes.  
5  
6  
7  
8 *J Clin Epidemiol* 2013;**66**:151–7. doi:10.1016/j.jclinepi.2012.01.006  
9
- 10 23 Ferro JM, Coutinho JM, Dentali F, *et al.* Safety and Efficacy of Dabigatran  
11 Etexilate vs Dose-Adjusted Warfarin in Patients With Cerebral Venous  
12 Thrombosis. *JAMA Neurol* Published Online First: 3 September 2019.  
13  
14  
15  
16  
17  
18  
19  
20  
21  
22  
23  
24  
25  
26  
27  
28  
29  
30  
31  
32  
33  
34  
35  
36  
37  
38  
39  
40  
41  
42  
43  
44  
45  
46  
47  
48  
49  
50  
51  
52  
53  
54  
55  
56  
57  
58  
59  
60
- 24 Hsu A, Mistry H, Lala N, *et al.* Preliminary findings regarding the use of direct  
oral anticoagulants in cerebral venous thrombosis. *Clin Neurol Neurosurg*  
2020;**198**:106204. doi:10.1016/j.clineuro.2020.106204
- 25 Powell M, Tremolet de Villers K, Schwarz K, *et al.* A Single-Center Retrospective  
26 Evaluation of the Use of Oral Factor Xa Inhibitors in Patients With Cerebral  
27 Venous Thrombosis. *Ann Pharmacother* 2020;:106002802095274.  
28  
29  
30  
31  
32  
33  
34  
35  
36  
37  
38  
39  
40  
41  
42  
43  
44  
45  
46  
47  
48  
49  
50  
51  
52  
53  
54  
55  
56  
57  
58  
59  
60
- 26 Lurkin A, Derex L, Fambrini A, *et al.* Direct Oral Anticoagulants for the  
Treatment of Cerebral Venous Thrombosis. *Cerebrovasc Dis* 2019;**48**:32–7.  
doi:10.1159/000502454
- 27 Wasay M, Khan M, Rajput HM, *et al.* New Oral Anticoagulants versus Warfarin  
for Cerebral Venous Thrombosis: A Multi-Center, Observational Study. *J Stroke*  
2019;**21**:220–3. doi:10.5853/jos.2019.00150
- 28 Herweh C, Griebel M, Geisbüscher C, *et al.* Frequency and temporal profile of  
recanalization after cerebral vein and sinus thrombosis. *Eur J Neurol*  
2016;**23**:681–7. doi:10.1111/ene.12901

- 1  
2  
3 29 Covut F, Kewan T, Perez O, *et al.* Apixaban and rivaroxaban in patients with  
4 cerebral venous thrombosis. *Thromb Res* 2018;**173**:77–8.  
5  
6 doi:10.1016/j.thromres.2018.11.018  
7  
8  
9  
10 30 Shankar Iyer R, TCR R, Akhtar S, *et al.* Is it safe to treat cerebral venous  
11 thrombosis with oral rivaroxaban without heparin? A preliminary study from 20  
12 patients. *Clin Neurol Neurosurg* 2018;**175**:108–11.  
13  
14 doi:10.1016/j.clineuro.2018.10.015  
15  
16  
17  
18 31 Rusin G, Wypasek E, Papuga-Szela E, *et al.* Direct oral anticoagulants in the  
19 treatment of cerebral venous sinus thrombosis: a single institution’s experience.  
20  
21 *Neurol Neurochir Pol* 2019;**53**:384–387. doi:10.5603/PJNNS.a2019.0037  
22  
23  
24  
25 32 Cappellari M, Bovi P. Direct oral anticoagulants in patients with cervical artery  
26 dissection and cerebral venous thrombosis. A case series and review of the  
27 literature. *Int J Cardiol* 2017;**244**:282–4. doi:10.1016/j.ijcard.2017.06.006  
28  
29  
30  
31  
32 33 Mendonça MD, Barbosa R, Cruz-e-Silva V, *et al.* Oral direct thrombin inhibitor as  
34 an alternative in the management of cerebral venous thrombosis: A series of 15  
35 patients. *Int J Stroke* 2015;**10**:1115–8. doi:10.1111/ijvs.12462  
36  
37  
38  
39 34 Anticoli S, Pezzella F, Scifoni G, *et al.* Treatment of Cerebral Venous Thrombosis  
40 with Rivaroxaban. *J Biomed Sci* 2016;**5**. doi:10.4172/2254-609X.100031  
41  
42  
43  
44 35 Sugie M, Iizuka N, Shimizu Y, *et al.* Cerebral Venous Thromboembolism in  
45 Antiphospholipid Syndrome Successfully Treated with the Combined Use of an  
46 Anti-Xa Inhibitor and Corticosteroid. *Intern Med* 2015;**54**:3051–6.  
47  
48  
49  
50  
51  
52  
53  
54 36 Mutgi SA, Grose NA, Behrouz R. Rivaroxaban for the treatment of cerebral  
55  
56  
57  
58  
59  
60



- 1  
2  
3 venous thrombosis. *Int J Stroke* 2015;**10**:167–8. doi:10.1111/ij.s.12592  
4  
5  
6 37 Huang Q, Chai X, Xiao C, *et al.* A case report of oral contraceptive misuse  
7  
8 induced cerebral venous sinus thrombosis and dural arteriovenous fistula.  
9  
10 *Medicine (Baltimore)* 2019;**98**:e16440. doi:10.1097/MD.00000000000016440  
11  
12  
13 38 Hu Y, Tang Z, Zhu W, *et al.* Clinical Reasoning: A teenager with persistent  
14  
15 headache. *Neurology* 2019;**92**:e1526–31. doi:10.1212/WNL.00000000000007184  
16  
17  
18 39 Chiu D, Weinberger J. Cerebral Venous Sinus Thrombosis and Acute Myocardial  
19  
20 Infarction in a Patient with PAI-1 4G/4G Homozygosity. *J Stroke Cerebrovasc Dis*  
21  
22 2020;**29**:105250. doi:10.1016/j.jstrokecerebrovasdis.2020.105250  
23  
24  
25 40 Talamo L, Douvas M, Macik BG, *et al.* Successful treatment with apixaban of  
26  
27 sinus venous thrombosis due to pegylated asparaginase in a young adult with T  
28  
29 cell acute lymphoblastic leukemia: case report and review of management. *Ann*  
30  
31 *Hematol* 2017;**96**:691–3. doi:10.1007/s00277-017-2930-0  
32  
33  
34 41 Rao SK, Ibrahim M, Hanni CM, *et al.* Apixaban for the treatment of cerebral  
35  
36 venous thrombosis: A case series. *J Neurol Sci* 2017;**381**:318–20.  
37  
38 doi:10.1016/j.jns.2017.09.007  
39  
40  
41 42 Yasushi S. Successful Treatment of Cerebral Sinus Thrombosis with Edoxaban  
42  
43 Alone. *Int J Crit Care Emerg Med* 2017;**3**. doi:10.23937/2474-3674/1510029  
44  
45  
46 43 Bando T, Ueno Y, Shimo D, *et al.* Clinical Trial Based Rationale for the  
47  
48 Successful Use of DOAC in the Treatment of Cerebral Venous Sinus Thrombosis  
49  
50 (CVST): A Case Report. *J Stroke Cerebrovasc Dis* 2020;**29**:105261.  
51  
52 doi:10.1016/j.jstrokecerebrovasdis.2020.105261  
53  
54  
55 44 Saito K, Ishii K, Furuta K, *et al.* Recurrent Cerebral Venous Thrombosis Treated  
56  
57  
58  
59  
60

- 1  
2  
3 with Direct Oral Anticoagulants in a Japanese Man with Hereditary Protein C  
4  
5 Deficiency. *J Stroke Cerebrovasc Dis* 2020;:105320.  
6  
7 doi:10.1016/j.jstrokecerebrovasdis.2020.105320  
8  
9  
10 45 Sugiyama Y, Tsuchiya T, Tanaka R, *et al.* Cerebral venous thrombosis in COVID-  
11  
12 19-associated coagulopathy: A case report. *J Clin Neurosci* 2020;79:30–2.  
13  
14 doi:10.1016/j.jocn.2020.07.038  
15  
16  
17 46 Bolaji P, Kukoyi B, Ahmad N, *et al.* Extensive cerebral venous sinus thrombosis: a  
18  
19 potential complication in a patient with COVID-19 disease. *BMJ Case Rep*  
20  
21 2020;13:e236820. doi:10.1136/bcr-2020-236820  
22  
23  
24 47 Micieli JA, Derkatch S, Pereira VM, *et al.* Development of dural arteriovenous  
25  
26 fistulas after cerebral venous sinus thrombosis. *J Neuro-Ophthalmology*  
27  
28 2016;36:53–7. doi:10.1097/WNO.0000000000000288  
29  
30  
31 48 Sui J, Zhang Y, Yang L, *et al.* Successful treatment with rivaroxaban of cerebral  
32  
33 venous thrombosis and bone marrow necrosis induced by pegaspargase: A case  
34  
35 report and literature review. *Medicine (Baltimore)* 2017;96:e8715.  
36  
37 doi:10.1097/MD.00000000000008715  
38  
39  
40 49 Cho Y, Chae MK, Cha JM, *et al.* Cerebral venous thrombosis in a patient with  
41  
42 Crohn's disease. *Intest Res* 2016;14:96. doi:10.5217/ir.2016.14.1.96  
43  
44  
45 50 Hsu Y, Juan C, Le J, *et al.* Anti-N-methyl-D-aspartate-receptor encephalitis  
46  
47 complicated with antiphospholipid syndrome and cerebral venous thrombosis. *J*  
48  
49 *Clin Rheumatol* 2017;23:294–5. doi:10.1186/2047-2994-1-19.  
50  
51  
52 51 Budhram A, Shettar B, Lee DH, *et al.* Bilateral Cavernous Sinus Thrombosis in  
53  
54 Lemierre's Syndrome. *Can J Neurol Sci / J Can des Sci Neurol* 2017;44:424–6.  
55  
56  
57  
58  
59  
60

- 1  
2  
3 doi:10.1017/cjn.2016.438  
4  
5  
6 52 Becerra AF, Amuchastegui T, Tabares AH. Decreased Rivaroxaban Levels in a  
7 Patient with Cerebral Vein Thrombosis Receiving Phenytoin. *Case Rep Hematol*  
8 2017;**2017**:1–3. doi:10.1155/2017/4760612  
9  
10  
11  
12 53 Hon SFK, Li HLT, Cheng PW. Use of direct thrombin inhibitor for treatment of  
13 cerebral venous thrombosis. *J Stroke Cerebrovasc Dis* 2012;**21**:915.e11-915.e15.  
14 doi:10.1016/j.jstrokecerebrovasdis.2012.02.004  
15  
16  
17  
18 54 Mathew T, Lobo AM, Kukkuta Sarma GR, *et al.* A case of post varicella cortical  
19 venous thrombosis successfully treated with dabigatran. *Neurol India*  
20 2013;**61**:531–2. doi:10.4103/0028-3886.121938  
21  
22  
23  
24 55 Inche Mat LN, Wan Sulaiman WA, Hoo FK, *et al.* A rare case of vein of Galen  
25 thrombosis: Exploring a potential role for novel oral anticoagulants (NOACs) in  
26 cerebral deep vein thrombosis. *Rawal Med. J.* 2017;**42**:432–4.  
27  
28  
29  
30  
31  
32  
33 56 Field TS, Camden M-C, Al-Shimemeri S, *et al.* Off-label use of novel  
34 anticoagulants for treatment of cerebral venous thrombosis: A Canadian survey.  
35 *Int J Stroke* 2017;**12**:NP16–8. doi:10.1177/1747493015616643  
36  
37  
38  
39  
40 57 Lee GKH, Chen VH, Tan C-H, *et al.* Comparing the efficacy and safety of direct  
41 oral anticoagulants with vitamin K antagonist in cerebral venous thrombosis. *J*  
42 *Thromb Thrombolysis* 2020;**50**:724–31. doi:10.1007/s11239-020-02106-7  
43  
44  
45  
46 58 Ganesh A, Luengo-Fernandez R, Wharton RM, *et al.* Ordinal vs dichotomous  
47 analyses of modified Rankin Scale, 5-year outcome, and cost of stroke. *Neurology*  
48 2018;**91**:e1951–60. doi:10.1212/WNL.0000000000006554  
49  
50  
51  
52  
53 59 Savitz SI, Lew R, Bluhmki E, *et al.* Shift Analysis Versus Dichotomization of the  
54  
55  
56  
57  
58  
59  
60

- 1  
2  
3 Modified Rankin Scale Outcome Scores in the NINDS and ECASS-II Trials.  
4  
5 *Stroke* 2007;**38**:3205–12. doi:10.1161/STROKEAHA.107.489351  
6  
7  
8 60 Albers GW, Marks MP, Kemp S, *et al.* Thrombectomy for Stroke at 6 to 16 Hours  
9  
10 with Selection by Perfusion Imaging. *N Engl J Med* 2018;**378**:708–18.  
11  
12 doi:10.1056/NEJMoa1713973  
13  
14  
15 61 Geisbüsch C, Richter D, Herweh C, *et al.* Novel factor Xa inhibitor for the  
16  
17 treatment of cerebral venous and sinus thrombosis: First experience in 7 patients.  
18  
19 *Stroke* 2014;**45**:2469–71. doi:10.1161/STROKEAHA.114.006167  
20  
21  
22 62 Thalia Field U of BC. Study of Rivaroxaban for CeREbral Venous Thrombosis  
23  
24 (SECRET). ClinicalTrials.gov Identifier: NCT03178864.  
25  
26  
27 63 U. Damascus. Rivaroxaban vs. Warfarin in CVT Treatment (RWCVT).  
28  
29 ClinicalTrials.gov Identifier: NCT04569279.  
30  
31  
32 64 Ferro JM, Coutinho JM, Jansen O, *et al.* Dural Arteriovenous Fistulae After  
33  
34 Cerebral Venous Thrombosis. *Stroke* 2020;**51**:3344–7.  
35  
36 doi:10.1161/STROKEAHA.120.031235  
37  
38  
39 65 Cui S, Chen S, Li X, *et al.* Prevalence of venous thromboembolism in patients with  
40  
41 severe novel coronavirus pneumonia. *J Thromb Haemost* 2020;**18**:1421–4.  
42  
43 doi:10.1111/jth.14830  
44  
45  
46 66 Romoli M, Jelcic I, Bernard-Valnet R, *et al.* A systematic review of neurological  
47  
48 manifestations of SARS-CoV-2 infection: the devil is hidden in the details. *Eur J*  
49  
50 *Neurol* 2020;**27**:1712–26. doi:10.1111/ene.14382  
51  
52  
53 67 Dentali F, Poli D, Scoditti U, *et al.* Long-term outcomes of patients with cerebral  
54  
55 vein thrombosis: a multicenter study. *J Thromb Haemost* 2012;**10**:1297–302.  
56  
57  
58  
59  
60

- 1  
2  
3 doi:10.1111/j.1538-7836.2012.04774.x  
4  
5  
6 68 Aguiar de Sousa D, Lucas Neto L, Canhão P, *et al.* Recanalization in Cerebral  
7  
8 Venous Thrombosis. *Stroke* 2018;:STROKEAHA.118.022129.  
9  
10 doi:10.1161/STROKEAHA.118.022129  
11  
12 69 Male C, Lensing AWA, Palumbo JS, *et al.* Rivaroxaban compared with standard  
13  
14 anticoagulants for the treatment of acute venous thromboembolism in children: a  
15  
16 randomised, controlled, phase 3 trial. *Lancet Haematol* 2020;7:e18–27.  
17  
18  
19 doi:10.1016/S2352-3026(19)30219-4  
20  
21 70 Pollack C V., Reilly PA, van Ryn J, *et al.* Idarucizumab for Dabigatran Reversal  
22  
23 — Full Cohort Analysis. *N Engl J Med* 2017;377:431–41.  
24  
25  
26 doi:10.1056/NEJMoa1707278  
27  
28  
29  
30  
31  
32  
33  
34  
35  
36  
37  
38  
39  
40  
41  
42  
43  
44  
45  
46  
47  
48  
49  
50  
51  
52  
53  
54  
55  
56  
57  
58  
59  
60

## FIGURE LEGEND

**Figure 1.** PRISMA flow diagram of studies included in systematic review. (N = number, CVT = cerebral venous thrombosis, DOAC = direct oral anticoagulant)

**Figure 2.** Forest plot comparing all-cause mortality between direct oral anticoagulant (DOAC) and standard therapy (warfarin, low molecular-weight heparin, or unfractionated heparin) for cerebral venous thrombosis

**Figure 3.** Forest plot comparing favourable functional outcome of modified Rankin Scale (mRS) of 0 to 2 between direct oral anticoagulant (DOAC) and standard therapy (warfarin, low molecular-weight heparin, or unfractionated heparin) for cerebral venous thrombosis

**Table 1. Published patients with CVT treated with DOAC**

| Study             | Year | Location      | Anticoagulant                         | N             | Study Type                  |
|-------------------|------|---------------|---------------------------------------|---------------|-----------------------------|
| Bando [43]        | 2020 | Japan         | Edoxaban                              | 1             | Case report                 |
| Hsu [24]          | 2020 | USA           | Rivaroxaban<br>Apixaban               | 1<br>7        | Observational cohort        |
| Saito [44]        | 2020 | Japan         | Edoxaban                              | 1             | Case Report                 |
| Sugiyama [45]     | 2020 | Japan         | Edoxaban                              | 1             | Case Report                 |
| Chiu [39]         | 2020 | USA           | Dabigatran                            | 1             | Case Report                 |
| Powell [25]       | 2020 | USA           | Rivaroxaban<br>Apixaban               | 12<br>7       | Observational cohort        |
| Bolaji [46]       | 2020 | UK            | Edoxaban                              | 1             | Case report                 |
| Ferro [23]        | 2019 | Multicenter   | Dabigatran                            | 60            | Randomized controlled trial |
| Lurkin [26]       | 2019 | France        | Dabigatran<br>Rivaroxaban<br>Apixaban | 2<br>13<br>1  | Observational cohort        |
| Wasay [27]        | 2019 | Multicenter   | Rivaroxaban<br>Dabigatran             | 36<br>9       | Observational cohort        |
| Huang [37]        | 2019 | China         | Dabigatran                            | 1             | Case report                 |
| Covut [29]        | 2019 | USA           | Rivaroxaban<br>Apixaban               | 4<br>5        | Case series                 |
| Hu [38]           | 2019 | China         | Dabigatran                            | 1             | Case report                 |
| Rusin.[31]        | 2019 | Poland        | Dabigatran<br>Rivaroxaban<br>Apixaban | 18<br>10<br>8 | Case series                 |
| Shankar Iyer [30] | 2018 | India         | Rivaroxaban                           | 20            | Case series                 |
| Yasushi [42]      | 2017 | Japan         | Edoxaban                              | 1             | Case report                 |
| Sui [48]          | 2017 | China         | Rivaroxaban                           | 1             | Case report                 |
| Becerra [52]      | 2017 | Argentina     | Dabigatran                            | 1             | Case report                 |
| Budhram [51]      | 2017 | Canada        | Rivaroxaban                           | 1             | Case report                 |
| Cappellari [32]   | 2017 | Italy         | Rivaroxaban                           | 4             | Case series                 |
| Hsu [50]          | 2017 | China         | Rivaroxaban                           | 1             | Case report                 |
| Inche Mat [55]    | 2017 | Malaysia      | Dabigatran                            | 1             | Case report                 |
| Rao [41]          | 2017 | United States | Apixaban                              | 3             | Case report                 |
| Talamo [40]       | 2017 | United States | Apixaban                              | 1             | Case report                 |
| Herweh [28]       | 2016 | Germany       | Rivaroxaban<br>Apixaban               | 12<br>1       | Observational cohort        |
| Anticoli [34]     | 2016 | Italy         | Rivaroxaban                           | 6             | Case series                 |
| Cho [49]          | 2016 | South Korea   | Rivaroxaban                           | 1             | Case report                 |
| Micieli [47]      | 2016 | Canada        | Rivaroxaban                           | 1             | Case report                 |
| Mendonça [33]     | 2015 | Portugal      | Dabigatran                            | 18            | Case series                 |
| Mutgi [36]        | 2015 | United States | Rivaroxaban                           | 2             | Case report                 |
| Sugie [35]        | 2015 | Japan         | Rivaroxaban                           | 1             | Case report                 |
| Mathew [54]       | 2013 | India         | Dabigatran                            | 1             | Case report                 |
| Hon [53]          | 2012 | Hong Kong     | Dabigatran                            | 2             | Case report                 |

Table 2. Summary of published patients with CVT treated by a DOAC

| Study                              | Anticoagulant | N (%)    | Female   | Age, years   | Time to AC start, days | AC duration, months | No recanalization | Recurrent CVT | New ICH     | Any bleed | mRS 0-2           | mRS 3-5     | Mortality |
|------------------------------------|---------------|----------|----------|--------------|------------------------|---------------------|-------------------|---------------|-------------|-----------|-------------------|-------------|-----------|
| <b>Randomized controlled trial</b> |               |          |          |              |                        |                     |                   |               |             |           |                   |             |           |
| Ferro 2019 [23]                    | Dabigatran    | 60 (50%) | 33 (55%) | 45.2 (±13.8) | 5 - 15                 | 5.15 (±1.4)         | 22/55 (40%)       | 0 (0%)        | 0/56 (0%)   | 12 (20%)  | 58/59 (98.3%)     | 1/59 (1.7%) | 0 (0%)    |
|                                    | Warfarin      | 60 (50%) | 33 (55%) | 45.2 (±13.8) |                        | 5.3 (±1.2)          | 17/52 (33%)       | 0 (0%)        | 2/53 (3.8%) | 12 (20%)  | 56/58 (96.6%)     | 2/58 (2.3%) | 0 (0%)    |
| <b>Observational cohorts</b>       |               |          |          |              |                        |                     |                   |               |             |           |                   |             |           |
| Hsu 2020 [24]                      | Apixaban      | 1 (2%)   | 5 (62%)  | 51 (18-92)   | N/A                    | N/A                 | N/A               | 0 (0%)        | 0 (0%)      | N/A       | N/A               |             | 2 (25%)   |
|                                    | Rivaroxaban   | 7 (15%)  | 22 (58%) | 43 (19-83)   | N/A                    | N/A                 | N/A               | 0 (0%)        | 0 (0%)      | N/A       | N/A               |             | 0 (0%)    |
|                                    | Warfarin      | 38 (83%) | 22 (58%) | 43 (19-83)   | N/A                    | N/A                 | N/A               | 0 (0%)        | 0 (0%)      | N/A       | N/A               |             | 0 (0%)    |
| Powell 2020 [25]                   | Apixaban      | 7 (6%)   | 8 (42%)  | 48.1         | 5.3                    | 11.03               | 6 (31.6%)         | 2 (11%)       | 0 (0%)      | 1 (5.3%)  | 0.78 <sup>a</sup> |             | 0 (0%)    |
|                                    | Rivaroxaban   | 12 (10%) | 11 (9%)  | 64           | 11.2                   | 13.48               | 31 (31%)          | 10 (10%)      | 3 (3%)      | 10 (10%)  | 1.32 <sup>a</sup> |             | 0 (0%)    |
|                                    | Warfarin      | 89 (75%) | 64 (64%) | 43.8         | 11.2                   | 13.48               | 31 (31%)          | 10 (10%)      | 3 (3%)      | 10 (10%)  | 1.32 <sup>a</sup> |             | 0 (0%)    |
| Lurkin 2019 [26]                   | Dabigatran    | 2 (5%)   | 10 (62%) | 39.9 (16-74) | N/A                    | 6                   | 10 (62%)          | 0 (0%)        | 1 (6.2%)    | N/A       | 13 (81%)          | 3 (19%)     | 0 (0%)    |
|                                    | Apixaban      | 1 (2%)   | 10 (62%) | 39.9 (16-74) | N/A                    | 6                   | 10 (62%)          | 0 (0%)        | 1 (6.2%)    | N/A       | 13 (81%)          | 3 (19%)     | 0 (0%)    |
|                                    | Rivaroxaban   | 13 (32%) | 15 (60%) | 47.7 (16-83) | N/A                    | 8                   | 9/11 (82%)        | 3/11 (27%)    | 3 (12%)     | N/A       | 6/11 (55%)        | 5/11 (45%)  | 0 (0%)    |
| Wasay 2019 [27]                    | Dabigatran    | 9 (8%)   | 27 (60%) | 36.5 (±14.7) | 7 (3-12)               | 8 (6-13)            | 1/5 (20%)         | 0 (0%)        | 0 (0%)      | 2 (4%)    | 35/39 (90%)       | 4/39 (10%)  | 2 (4%)    |
|                                    | Rivaroxaban   | 36 (32%) | 37 (56%) | 41.3 (±14.8) | 5 (3-10)               | 5 (6-13)            | 3/7 (43%)         | 0 (0%)        | 1 (1.5%)    | 6 (9%)    | 44/56 (79%)       | 12/56 (21%) | 4 (6%)    |
|                                    | Warfarin      | 66 (59%) | 37 (56%) | 41.3 (±14.8) | 5 (3-10)               | 5 (6-13)            | 3/7 (43%)         | 0 (0%)        | 1 (1.5%)    | 6 (9%)    | 44/56 (79%)       | 12/56 (21%) | 4 (6%)    |
| Herweh 2016 <sup>b</sup> [28]      | Apixaban      | 1 (1%)   | 8 (62%)  | 41.7 (±20.5) | 6 (4-9)                | 7 (1-84)            | 2 (15%)           | 0 (0%)        | 0 (0%)      | 3 (23%)   | 13 (100%)         | 0 (0%)      | 0 (0%)    |
|                                    | Rivaroxaban   | 12 (12%) | 73 (85%) | 37.4         | N/A                    |                     | 11 (13%)          | 0 (0%)        | 1 (1%)      | 2 (2.3%)  | 76 (88%)          | 8 (9.3%)    | 2 (2.3%)  |
|                                    | Warfarin      | 83 (84%) | 73 (85%) | 37.4         | N/A                    |                     | 11 (13%)          | 0 (0%)        | 1 (1%)      | 2 (2.3%)  | 76 (88%)          | 8 (9.3%)    | 2 (2.3%)  |



**Table 2 (continued). Summary of published patients with CVT treated by a DOAC**

| Study                           | AC                        | N (%)     | Female     | Age, years   | Time to AC start, days | AC duration, months | No recanalization | Recurrent CVT | New ICH | Any bleed | mRS 0-2    | mRS 3-5  | Mortality |
|---------------------------------|---------------------------|-----------|------------|--------------|------------------------|---------------------|-------------------|---------------|---------|-----------|------------|----------|-----------|
| <b>Case series</b>              |                           |           |            |              |                        |                     |                   |               |         |           |            |          |           |
| Covut 2019 [29]                 | Apixaban                  | 5 (56%)   | 4 (80%)    | 62 (±21)     | 1 (1-18)               | 12 (6-56)           | 3 (60%)           | 0 (0%)        | 0 (0%)  | 0 (0%)    | 4 (80%)    | 1 (20%)  | 0 (0%)    |
|                                 | Rivaroxaban               | 4 (44%)   | 3 (75%)    | 57 (±22)     | 2 (1-30)               | 8 (3-14)            | 1 (25%)           | 0 (0%)        | 0 (0%)  | 0 (0%)    | 4 (100%)   | 0 (0%)   | 0 (0%)    |
| Rusin 2019 [31]                 | Dabigatran                | 18 (50%)  | 21 (58.3%) | 40.3 (±9.2)  | 6 (IQR 5-8.8)          | 8.5 (IQR 6.2-12)    | 2 (5.6%)          | 2 (5.6%)      | 0 (0%)  | 3 (8.3%)  | 34 (94.4%) | 2 (5.6%) | 0 (0%)    |
|                                 | Apixaban                  | 8 (22%)   |            |              |                        |                     |                   |               |         |           |            |          |           |
|                                 | Rivaroxaban               | 10 (28%)  |            |              |                        |                     |                   |               |         |           |            |          |           |
| Shankar Iyer 2018 [30]          | Rivaroxaban               | 20 (100%) | 4 (20%)    | 34.2 (±13.2) | 0 (0-0)                | 6                   | 0 (0%)            | N/A           | 0 (0%)  | 0 (0%)    | 20 (100%)  | 0 (0%)   | 0 (0%)    |
| Cappellari 2017 [32]            | Rivaroxaban               | 4 (100%)  | 4 (100%)   | 31.2 (±7.1)  | 4 (3-8)                | 4.5 (3-6)           | 0 (0%)            | N/A           | 0 (0%)  | N/A       | 4 (100%)   | 0 (0%)   | 0 (0%)    |
| Anticoli 2016 [34]              | Rivaroxaban               | 6 (100%)  | 6 (100%)   | 36.5 (16-46) | 7 (4-90)               | 4 (3-5)             | 0 (0%)            | 0 (0%)        | 0 (0%)  | 0 (0%)    | 6 (100%)   | 0 (0%)   | 0 (0%)    |
| Mendonça 2015 <sup>c</sup> [33] | Dabigatran                | 18(100%)  | 15 (83.3%) | 41.2 ±13.8   | 13 (4-58)              | 7 (3-41)            | 3 (16.7%)         | 0 (0%)        | 0 (0%)  | 0 (0%)    | 17 (94.4%) | 1 (5.6%) | 0 (0%)    |
| <b>Pooled case studies</b>      |                           |           |            |              |                        |                     |                   |               |         |           |            |          |           |
|                                 | Dabigatran [37-39,52-55]  | 8 (32%)   | 5 (62%)    | 37.9         | 13/7                   | 3.7                 | 0 (0%)            | 0 (0%)        | 1 (12%) | 1 (12%)   | 100%       | 0%       | 0%        |
|                                 | Apixaban [40,41]          | 4 (16%)   | 2 (50%)    | 27.7         | 6                      | 5.6                 | 0 (0%)            | 0 (0%)        | 0 (0%)  | 0 (0%)    | 100%       | 0%       | 0%        |
|                                 | Rivaroxaban [35,36,47-51] | 8 (32%)   | 4 (50%)    | 38.4         | 37/4                   | 6.6                 | 0 (0%)            | 0 (0%)        | 0 (0%)  | 0 (0%)    | 100%       | 0%       | 0%        |
|                                 | Edoxaban [42-46]          | 5 (20%)   | 2 (40%)    | 56.6         | 12/2                   | 6.7                 | 0 (0%)            | 0 (0%)        | 0 (0%)  | 0 (0%)    | 100%       | 0%       | 0%        |

Data is shown as a number (%), median (range), or mean (±standard deviation), unless otherwise stated

If data is not available for all patients, the denominator is shown

- A. Mean mRS at follow-up reported
- B. Patient level data was acquired from contacting authors
- C. Data from three additional patients were included from contacting authors

AC = anticoagulation, CVT = cerebral venous thrombosis, ICH = intracranial hemorrhage, IQR = interquartile range, LMWH = low molecular-weight heparin, mRS = modified Rankin Scale, N = number

For peer review only

1  
2  
3  
4  
5  
6  
7  
8  
9  
10  
11  
12  
13  
14  
15  
16  
17  
18  
19  
20  
21  
22  
23  
24  
25  
26  
27  
28  
29  
30  
31  
32  
33  
34  
35  
36  
37  
38  
39  
40  
41  
42  
43  
44  
45  
46  
47

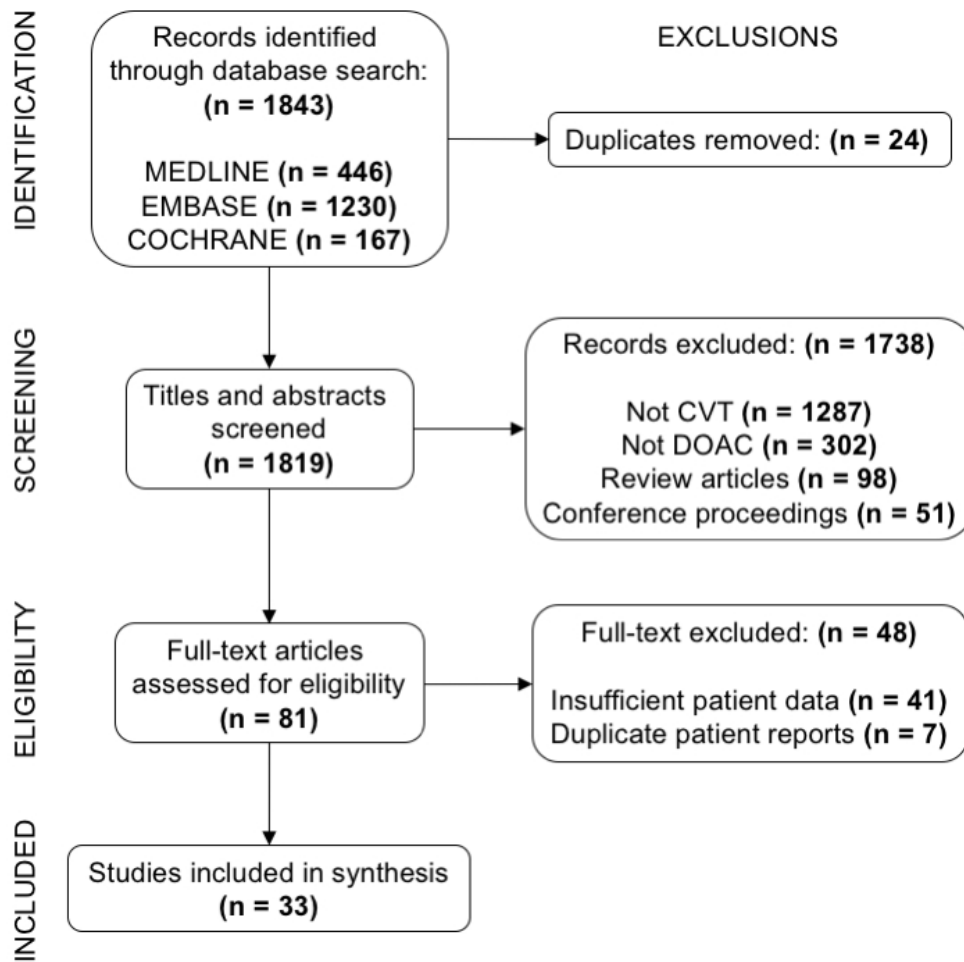

38  
39  
40  
41  
42  
43  
44  
45  
46  
47  
48  
49  
50  
51  
52  
53  
54  
55  
56  
57  
58  
59  
60

Figure 1. PRISMA flow diagram of studies included in systematic review. (N = number, CVT = cerebral venous thrombosis, DOAC = direct oral anticoagulant)

149x149mm (122 x 122 DPI)

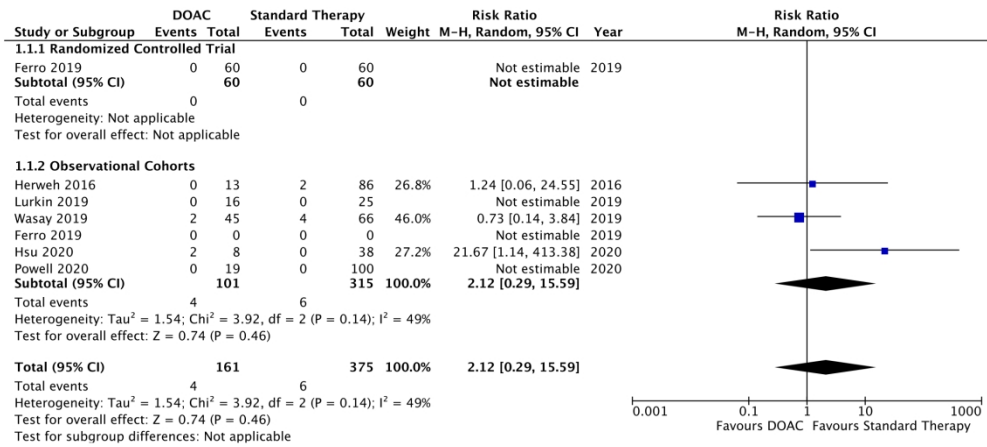

Figure 2. Forest plot comparing all-cause mortality between direct oral anticoagulant (DOAC) and standard therapy (warfarin, low molecular-weight heparin, or unfractionated heparin) for cerebral venous thrombosis

197x92mm (300 x 300 DPI)

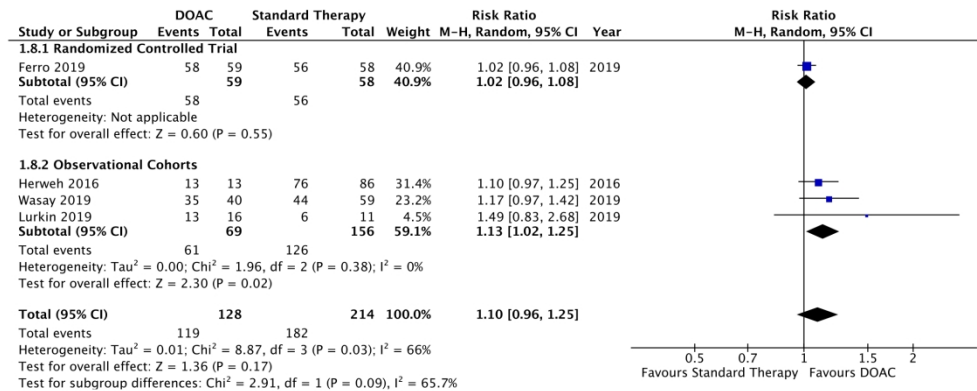

Figure 3. Forest plot comparing favourable functional outcome of modified Rankin Scale (mRS) of 0 to 2 between direct oral anticoagulant (DOAC) and standard therapy (warfarin, low molecular-weight heparin, or unfractionated heparin) for cerebral venous thrombosis

199x78mm (300 x 300 DPI)

## SUPPLEMENTAL MATERIAL

### Direct oral anticoagulants in treatment of cerebral venous thrombosis: systematic review

Gauruv Bose<sup>1</sup>, Justin Graveline<sup>1</sup>, Vignan Yogendrakumar<sup>1</sup>, Risa Shorr<sup>1</sup>, Dean Fergusson<sup>1</sup>, Gregoire Le Gal<sup>1</sup>, Jonathan M. Coutinho<sup>2</sup>, Marcelo Mendonça<sup>3</sup>, Miguel Viana-Baptista<sup>3</sup>, Simon Nagel<sup>4</sup>, and Dar Dowlathshahi<sup>1</sup>

1. Department of Medicine, University of Ottawa and The Ottawa Hospital Research Institute, Ottawa, Canada

2. Department of Neurology, University Medical Center, Amsterdam, Netherlands

3. Department of Neurology, Centro Hospitalar de Lisboa Ocidental, Lisbon, Portugal

4. Department of Neurology, University Hospital, University of Heidelberg, Heidelberg, Germany

## Appendix I: Search Strategy

The complete protocol is previously published[1] and is hosted on PROSPERO (ID: CRD42017078398).[2]

### Ovid MEDLINE(R) ALL Strategy:

1. apixaban.mp.
2. edoxaban.mp.
3. Dabigatran.mp.
4. Rivaroxaban.mp.
5. (doac\* or noac\*).tw,kw.
6. ((direct oral or novel) adj3 (anticoagul\* or anti coagulat\*)).tw.
7. exp Factor Xa Inhibitors/
8. Factor Xa Inhibit\*.mp.
9. Antithrombins/ or thrombin inhibit\*.mp.
10. or/1-9
11. "intracranial embolism and thrombosis"/ or intracranial thrombosis/ or exp sinus thrombosis, intracranial/
12. cvt.tw,kw.
13. (cerebral veins/ or exp cranial sinuses/) and (thrombosis/ or venous thrombosis/)
14. ((sinus\* or sinovenous or cerebral or cavernous or sagittal venous or sagittal vein\* or cerebrovenous or cerebro-venous or sigmoid) and thrombo\*).tw,kw.
15. intracran\* thrombo\*.kw. or (intracran\* adj3 thrombo\*).tw.
16. 11 or 12 or 13 or 14 or 15
17. 10 and 16

### Database: Embase Classic+Embase Strategy:

1. apixaban.mp.
2. edoxaban.mp.
3. Dabigatran.mp.
4. Rivaroxaban.mp.
5. (doac\* or noac\*).tw.
6. ((direct oral or novel) adj3 (anticoagul\* or anti coagulat\*)).tw.
7. exp \*Factor Xa Inhibitors/
8. Factor Xa Inhibit\*.tw.
9. exp \*thrombin inhibitor/ or thrombin\* inhibit\*.tw.
10. or/1-9
11. exp cerebral sinus thrombosis/ or \*occlusive cerebrovascular disease/
12. ((sinus\* or sinovenous or cerebral or cavernous or sagittal venous or sagittal vein\* or cerebrovenous or cerebro-venous or sigmoid) and thrombo\*).tw.
13. (intracran\* adj3 thrombo\*).tw.

14. cvt.tw.
15. or/11-14
16. 10 and 15

**Database: EBM Reviews - Cochrane Central Register of Controlled Trials**  
**Search Strategy:**

1. apixaban.mp.
2. edoxaban.mp.
3. Dabigatran.mp.
4. Rivaroxaban.mp.
5. (doac\* or noac\*).tw,kw.
6. ((direct oral or novel) adj3 (anticoagul\* or anti coagulat\*)).tw.
7. exp Factor Xa Inhibitors/
8. Factor Xa Inhibit\*.mp.
9. Antithrombins/ or thrombin inhibit\*.mp.
10. or/1-9
11. "intracranial embolism and thrombosis"/ or intracranial thrombosis/ or exp sinus thrombosis, intracranial/
12. cvt.tw,kw.
13. (cerebral veins/ or exp cranial sinuses/) and (thrombosis/ or venous thrombosis/)
14. ((sinus\* or sinovenous or cerebral or cavernous or sagittal venous or sagittal vein\* or cerebrovenous or cerebro-venous or sigmoid) and thrombo\*).tw,kw.
15. intracran\* thrombo\*.kw. or (intracran\* adj3 thrombo\*).tw.
16. 11 or 12 or 13 or 14 or 15
17. 10 and 16



Appendix II: Forest Plots

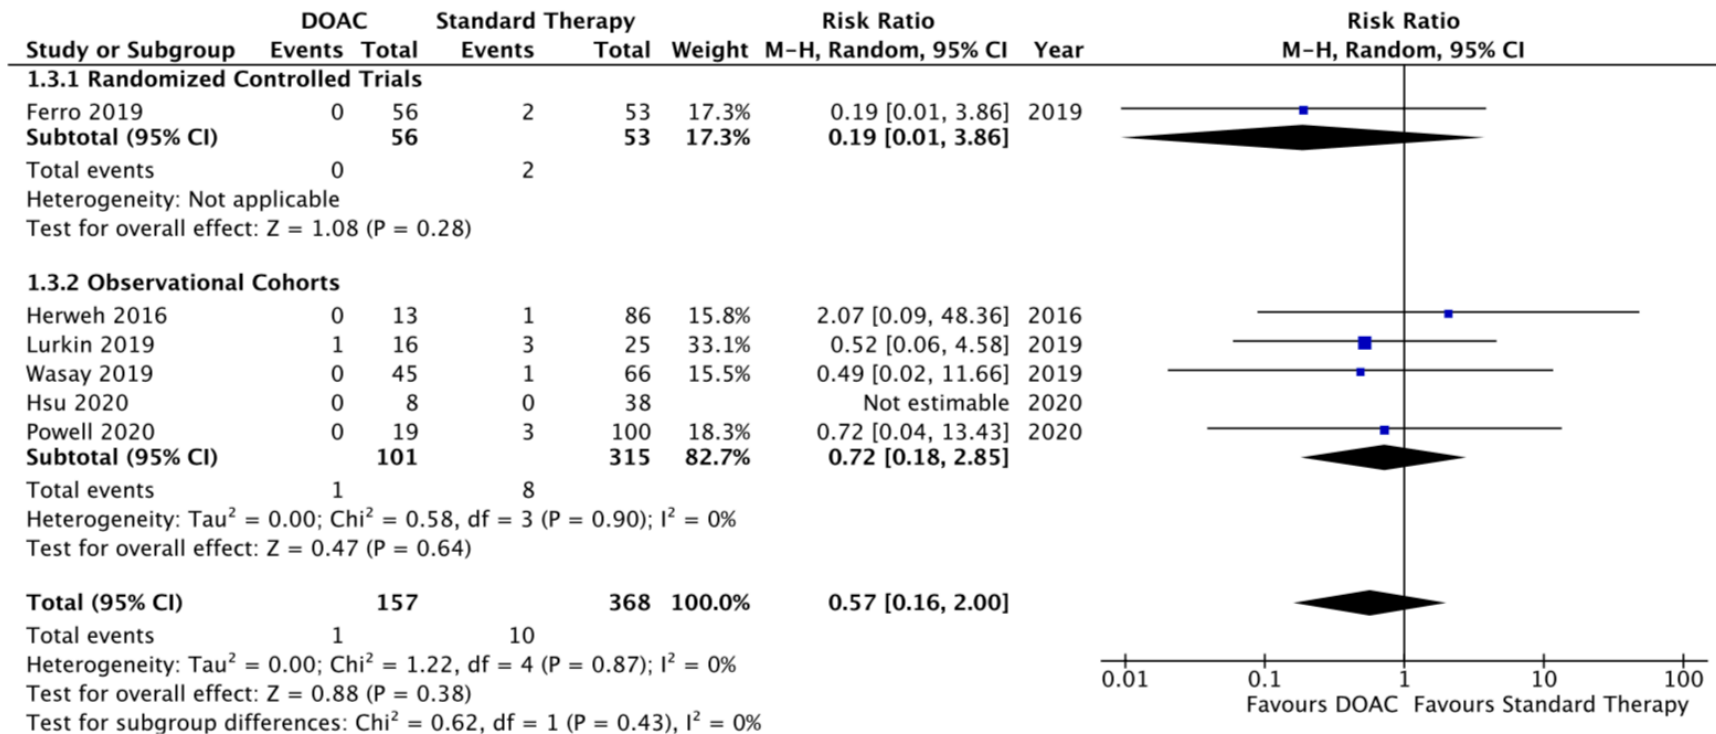

Figure s1. Forest plot comparing intracranial hemorrhage (ICH) between direct oral anticoagulant (DOAC) and standard therapy (warfarin, low molecular-weight heparin, or unfractionated heparin) for cerebral venous thrombosis

Appendix II: Forest Plots

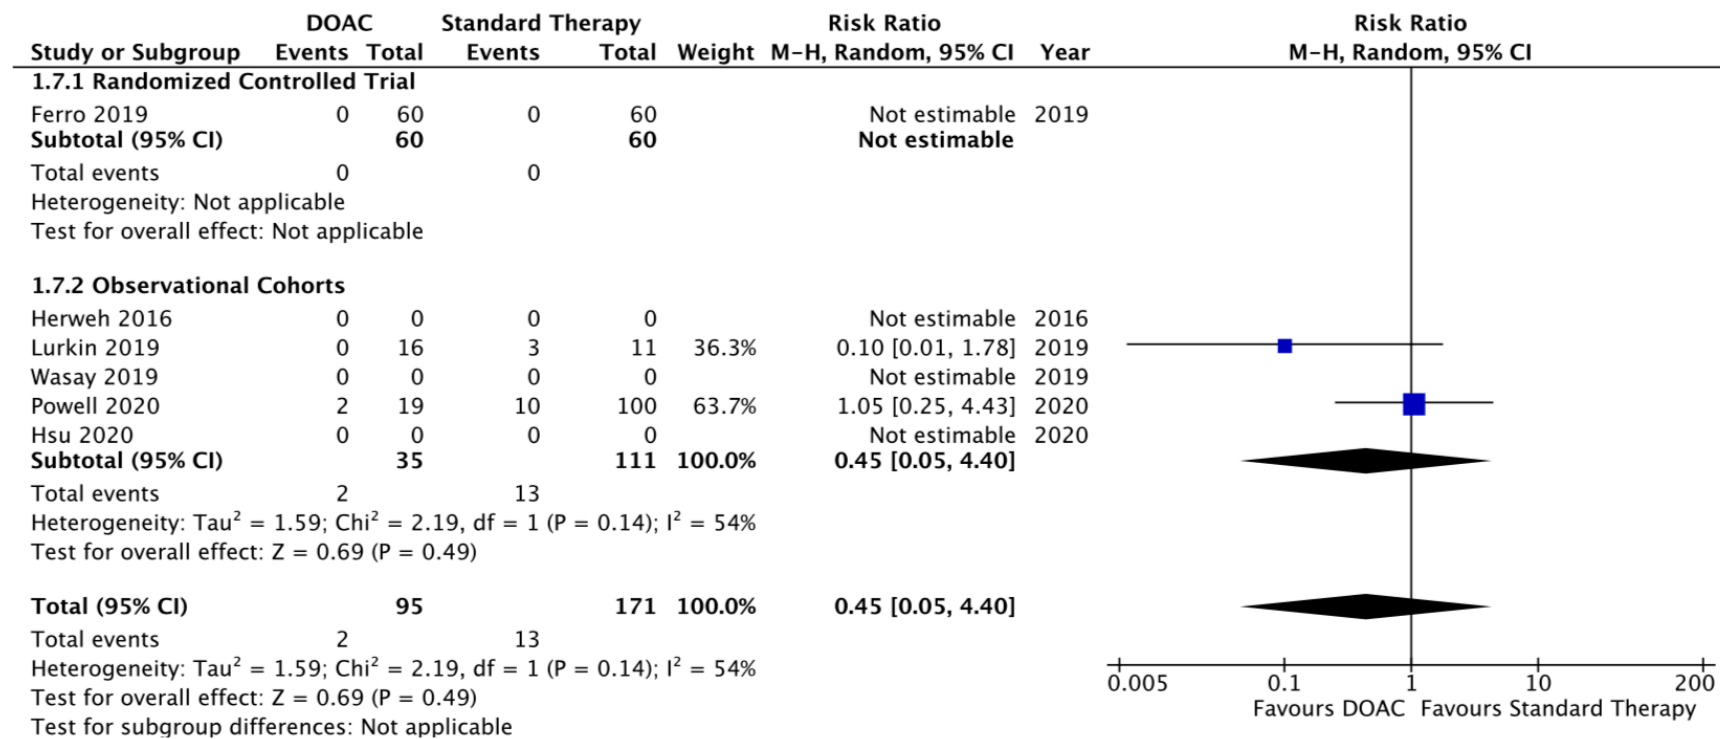

Figure s2. Forest plot comparing recurrent cerebral venous thrombosis (CVT) between direct oral anticoagulant (DOAC) and standard therapy (warfarin, low molecular-weight heparin, or unfractionated heparin)

Appendix II: Forest plots

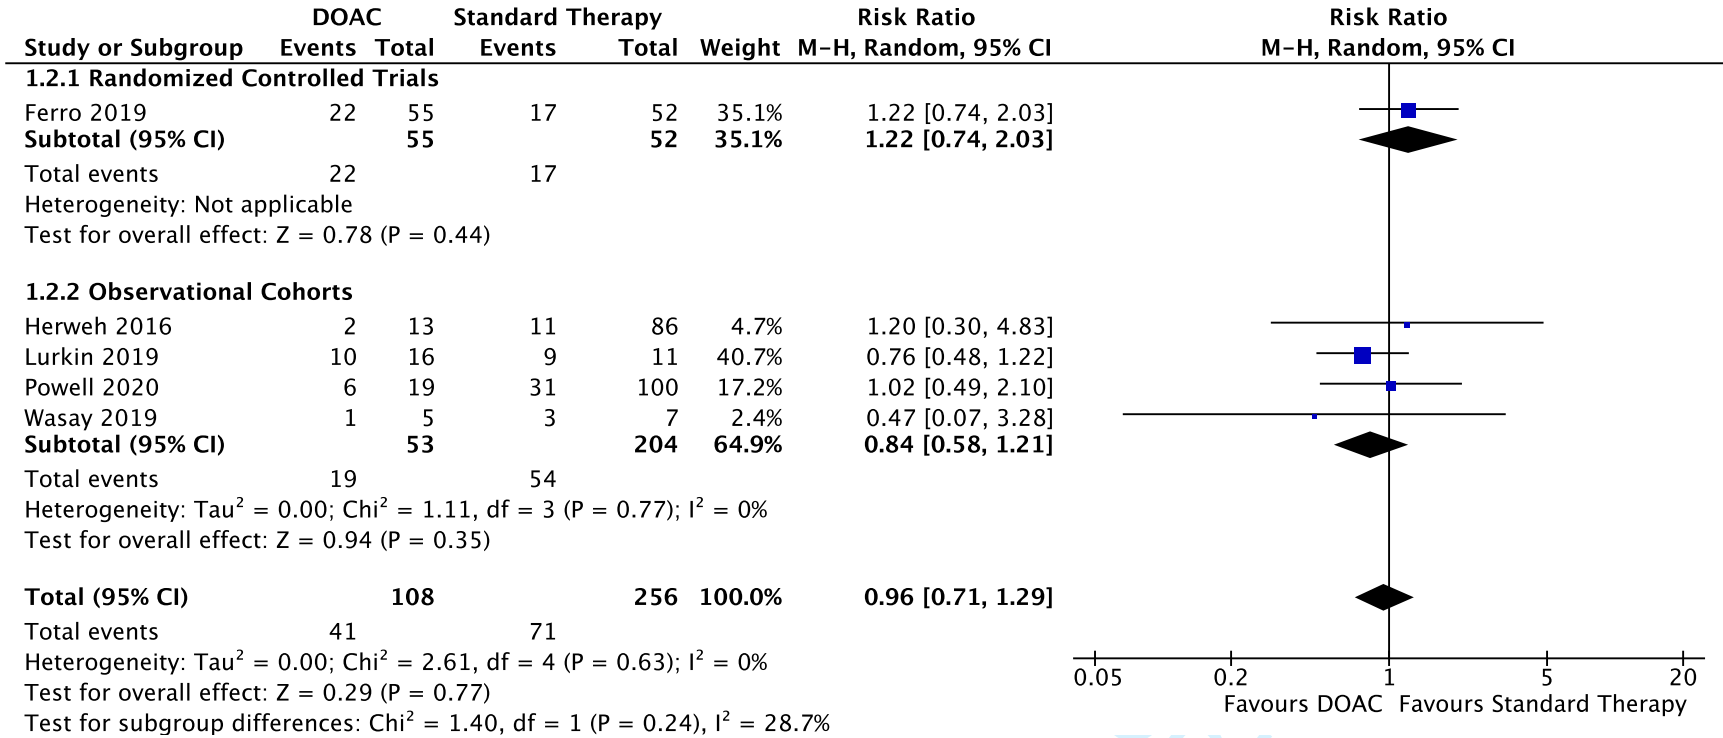

Figure s3. Forest plot comparing incomplete recanalization for cerebral venous thrombosis (CVT) between direct oral anticoagulant (DOAC) and standard therapy (warfarin, low molecular-weight heparin, or unfractionated heparin)

## Appendix III: Risk of Bias Tables

Table s1: Randomized Controlled Trials; Cochrane Risk of Bias Tool

|                         | Year | Random Sequence Generation                                                          | Allocation Concealment                                              | Blinding of Participants                                                          | Blinding of Outcome Assessment                                                                  | Incomplete Outcome Data                                                                                                                                     | Selective Reporting                                                 | Other Bias                                                                      |
|-------------------------|------|-------------------------------------------------------------------------------------|---------------------------------------------------------------------|-----------------------------------------------------------------------------------|-------------------------------------------------------------------------------------------------|-------------------------------------------------------------------------------------------------------------------------------------------------------------|---------------------------------------------------------------------|---------------------------------------------------------------------------------|
| Ferro <i>et al.</i> [3] | 2019 | <b>Low Risk:</b> Patients were randomized using an online 24-hour telephone service | <b>Low Risk:</b> Concealment maintained using the telephone service | <b>High Risk:</b> Patients and treating teams were aware of treatment allocation. | <b>Low Risk:</b> All outcomes were adjudicated in a blinded manner by an adjudication committee | <b>Low Risk:</b> All missing/excluded patients were disclosed by study authors. Reasons for exclusion were provided. 11 patients lost to follow-up overall. | <b>Low Risk:</b> all outcomes that were pre-specified were reported | <b>Unclear:</b> exploratory trial with no formal hypothesis statistical testing |

Appendix III: Risk of Bias Tables

Table s2: Observational Cohorts; NewCastle Ottawa Scale

|                                                                                      | Year | Selection<br>(Max ★★★★★)                       |                                                  |                              |                                        | Comparability<br>(Max ★★)                     | Outcome<br>Max (★★★)     |                                  |                                         |
|--------------------------------------------------------------------------------------|------|------------------------------------------------|--------------------------------------------------|------------------------------|----------------------------------------|-----------------------------------------------|--------------------------|----------------------------------|-----------------------------------------|
|                                                                                      |      | Representativeness<br>of the exposed<br>cohort | Selection<br>of the<br>non-<br>exposed<br>cohort | Ascertainment<br>of exposure | Outcome<br>absent at<br>study<br>start | Comparable<br>cohorts (design<br>or analysis) | Assessment<br>of outcome | Appropriate<br>follow-up<br>time | Adequate<br>follow-<br>up of<br>cohorts |
| Hsu <i>et al.</i> [4]                                                                | 2020 | ★                                              | ★                                                | ★                            | ★                                      |                                               | ★                        | ★                                | ★                                       |
| Powell <i>et al.</i> [5]                                                             | 2020 | ★                                              | ★                                                | ★                            | ★                                      |                                               | ★                        | ★                                | ★                                       |
| Lurkin <i>et al.</i> [6]                                                             | 2019 | ★                                              | ★                                                | ★                            | ★                                      |                                               | ★                        | ★                                | ★                                       |
| Wasay <i>et al.</i> [7]                                                              | 2019 | ★                                              | ★                                                | ★                            | ★                                      |                                               | ★                        | ★                                | ★                                       |
| Herweh <i>et al.</i> [8] <sup>a</sup>                                                | 2016 | ★                                              | ★                                                | ★                            | ★                                      |                                               | ★                        | ★                                | ★                                       |
| <i>A. Additional patient level information was provided upon request to authors.</i> |      |                                                |                                                  |                              |                                        |                                               |                          |                                  |                                         |

## Appendix III: Risk of Bias Tables

Table s3: Case Series; Johanna Briggs Institute Critical Appraisal for Case Series

|                                 | Year | Clear Inclusion Criteria | Condition Measured in Reliable Way | Valid Method to ID condition | Consecutive Inclusion | Complete Inclusion | Demographics | Clinical Information | Outcomes | Presenting Site, Clinical Demographics | Stat Analysis |
|---------------------------------|------|--------------------------|------------------------------------|------------------------------|-----------------------|--------------------|--------------|----------------------|----------|----------------------------------------|---------------|
| Covut <i>et al.</i> [9]         | 2019 | Y                        | N                                  | N                            | Y                     | Y                  | Y            | Y                    | Y        | N                                      | N             |
| Rusin <i>et al.</i> [10]        | 2019 | Y                        | Y                                  | Y                            | Y                     | Y                  | Y            | Y                    | Y        | Y                                      | N             |
| Shankar Iyer <i>et al.</i> [11] | 2018 | Y                        | Unclear                            | Unclear                      | Y                     | Y                  | Y            | Y                    | Y        | N                                      | N             |
| Cappellari <i>et al.</i> [12]   | 2017 | Y                        | Unclear                            | Unclear                      | Unclear               | Unclear            | Y            | Y                    | Y        | N                                      | Y             |
| Anticoli <i>et al.</i> [13]     | 2016 | Y                        | Y                                  | Y                            | Y                     | Y                  | Y            | Y                    | Y        | Y                                      | N             |
| Mendonca <i>et al.</i> [14]     | 2015 | Y                        | Y                                  | Y                            | Y                     | Y                  | Y            | Y                    | Y        | Y                                      | N             |

Appendix III: Risk of Bias Tables

Table s4: Case Reports; Johanna Briggs Institute Critical Appraisal

|                              | Year | Patient Demographics Clearly Described | Patient History Clearly Described | Clinical Condition Clearly Described | Diagnostic Tests Well Described | Intervention or Treatment Well Described | Post-Intervention Clinical Condition Described | Adverse Events | Takeaway Lesson? |
|------------------------------|------|----------------------------------------|-----------------------------------|--------------------------------------|---------------------------------|------------------------------------------|------------------------------------------------|----------------|------------------|
| Bando <i>et al.</i> [15]     | 2020 | Y                                      | Y                                 | Y                                    | Y                               | Y                                        | Y                                              | N              | Y                |
| Saito <i>et al.</i> [16]     | 2020 | Y                                      | N                                 | Y                                    | Y                               | N                                        | Y                                              | N              | Y                |
| Sugiyama <i>et al.</i> [17]  | 2020 | Y                                      | N                                 | Y                                    | Y                               | Y                                        | Y                                              | Y              | Y                |
| Chiu <i>et al.</i> [18]      | 2020 | Y                                      | N                                 | Y                                    | Y                               | N                                        | Y                                              | Y              | Y                |
| Bolaji <i>et al.</i> [19]    | 2020 | Y                                      | Y                                 | Y                                    | Y                               | N                                        | N                                              | N              | N                |
| Huang <i>et al.</i> [20]     | 2019 | N                                      | Y                                 | Y                                    | Y                               | Y                                        | Y                                              | Y              | Y                |
| Hu <i>et al.</i> [21]        | 2019 | Y                                      | Y                                 | Y                                    | Y                               | Y                                        | Y                                              | N              | Y                |
| Yasushi [22]                 | 2017 | Y                                      | Y                                 | Y                                    | Y                               | Y                                        | Y                                              | N              | Y                |
| Sui <i>et al.</i> [23]       | 2017 | N                                      | Y                                 | Y                                    | Y                               | Y                                        | Y                                              | N              | Y                |
| Becerra <i>et al.</i> [24]   | 2017 | N                                      | Y                                 | Y                                    | Y                               | Y                                        | Y                                              | Y              | Y                |
| Budhram <i>et al.</i> [25]   | 2017 | Y                                      | Y                                 | Y                                    | Y                               | Y                                        | N                                              | N              | Y                |
| Hsu <i>et al.</i> [26]       | 2017 | N                                      | Y                                 | Y                                    | Y                               | Y                                        | Y                                              | N              | Y                |
| Inche Mat <i>et al.</i> [27] | 2017 | Y                                      | N                                 | Y                                    | N                               | Y                                        | N                                              | N              | Y                |
| Rao <i>et al.</i> [28]       | 2017 | N                                      | Y                                 | Y                                    | Y                               | Y                                        | Y                                              | N              | Y                |
| Talamo <i>et al.</i> [29]    | 2017 | Y                                      | Y                                 | Y                                    | Y                               | Y                                        | Y                                              | N              | Y                |
| Cho <i>et al.</i> [30]       | 2016 | Y                                      | Y                                 | Y                                    | Y                               | Y                                        | Y                                              | N              | Y                |
| Micieli <i>et al.</i> [31]   | 2016 | Y                                      | Y                                 | N                                    | Y                               | N                                        | Y                                              | N              | N                |
| Mutgi <i>et al.</i> [32]     | 2015 | N                                      | N                                 | N                                    | Y                               | N                                        | Y                                              | N              | Y                |
| Sugie <i>et al.</i> [33]     | 2015 | Y                                      | Y                                 | Y                                    | Y                               | Y                                        | Y                                              | N              | Y                |
| Mathew <i>et al.</i> [34]    | 2013 | N                                      | Y                                 | Y                                    | Y                               | Y                                        | Y                                              | N              | Y                |
| Hon <i>et al.</i> [35]       | 2012 | Y                                      | Y                                 | Y                                    | Y                               | Y                                        | Y                                              | N              | Y                |

### Supplemental references

- 1 Bose G, Graveline J, Yogendrakumar V, *et al.* Direct oral anticoagulants in treatment of cerebral venous thrombosis: a systematic review protocol. *Syst Rev* 2019;**8**:99. doi:10.1186/s13643-019-1022-8
- 2 Bose G, Graveline J, Dowlatshahi D. Systematic review of direct oral anticoagulants in treatment of cerebral venous thrombosis. *PROSPERO* 2017.
- 3 Ferro JM, Coutinho JM, Dentali F, *et al.* Safety and Efficacy of Dabigatran Etextilate vs Dose-Adjusted Warfarin in Patients With Cerebral Venous Thrombosis. *JAMA Neurol* Published Online First: 3 September 2019. doi:10.1001/jamaneurol.2019.2764
- 4 Hsu A, Mistry H, Lala N, *et al.* Preliminary findings regarding the use of direct oral anticoagulants in cerebral venous thrombosis. *Clin Neurol Neurosurg* 2020;**198**:106204. doi:10.1016/j.clineuro.2020.106204
- 5 Powell M, Tremolet de Villers K, Schwarz K, *et al.* A Single-Center Retrospective Evaluation of the Use of Oral Factor Xa Inhibitors in Patients With Cerebral Venous Thrombosis. *Ann Pharmacother* 2020;:106002802095274. doi:10.1177/1060028020952749
- 6 Lurkin A, Derex L, Fambrini A, *et al.* Direct Oral Anticoagulants for the Treatment of Cerebral Venous Thrombosis. *Cerebrovasc Dis* 2019;**48**:32–7. doi:10.1159/000502454
- 7 Wasay M, Khan M, Rajput HM, *et al.* New Oral Anticoagulants versus Warfarin for Cerebral Venous Thrombosis: A Multi-Center, Observational Study. *J Stroke* 2019;**21**:220–3. doi:10.5853/jos.2019.00150
- 8 Herweh C, Griebbe M, Geisbüsch C, *et al.* Frequency and temporal profile of recanalization after cerebral vein and sinus thrombosis. *Eur J Neurol* 2016;**23**:681–7. doi:10.1111/ene.12901
- 9 Covut F, Kewan T, Perez O, *et al.* Apixaban and rivaroxaban in patients with cerebral venous thrombosis. *Thromb Res* 2018;**173**:77–8. doi:10.1016/j.thromres.2018.11.018
- 10 Rusin G, Wypasek E, Papuga-Szela E, *et al.* Direct oral anticoagulants in the treatment of cerebral venous sinus thrombosis: a single institution's experience. *Neurol Neurochir Pol* 2019;**53**:384–387. doi:10.5603/PJNNS.a2019.0037
- 11 Shankar Iyer R, TCR R, Akhtar S, *et al.* Is it safe to treat cerebral venous thrombosis with oral rivaroxaban without heparin? A preliminary study from 20 patients. *Clin Neurol Neurosurg* 2018;**175**:108–11. doi:10.1016/j.clineuro.2018.10.015
- 12 Cappellari M, Bovi P. Direct oral anticoagulants in patients with cervical artery dissection and cerebral venous thrombosis. A case series and review of the literature. *Int J Cardiol* 2017;**244**:282–4. doi:10.1016/j.ijcard.2017.06.006
- 13 Anticoli S, Pezzella F, Scifoni G, *et al.* Treatment of Cerebral Venous Thrombosis with Rivaroxaban. *J Biomed Sci* 2016;**5**. doi:10.4172/2254-609X.100031
- 14 Mendonça MD, Barbosa R, Cruz-e-Silva V, *et al.* Oral direct thrombin inhibitor as an alternative in the management of cerebral venous thrombosis: A series of 15 patients. *Int J Stroke* 2015;**10**:1115–8. doi:10.1111/ij.12462
- 15 Bando T, Ueno Y, Shimo D, *et al.* Clinical Trial Based Rationale for the



- 1  
2  
3 Successful Use of DOAC in the Treatment of Cerebral Venous Sinus Thrombosis  
4 (CVST): A Case Report. *J Stroke Cerebrovasc Dis* 2020;**29**:105261.  
5 doi:10.1016/j.jstrokecerebrovasdis.2020.105261  
6  
7 16 Saito K, Ishii K, Furuta K, *et al.* Recurrent Cerebral Venous Thrombosis Treated  
8 with Direct Oral Anticoagulants in a Japanese Man with Hereditary Protein C  
9 Deficiency. *J Stroke Cerebrovasc Dis* 2020;**;**105320.  
10 doi:10.1016/j.jstrokecerebrovasdis.2020.105320  
11  
12 17 Sugiyama Y, Tsuchiya T, Tanaka R, *et al.* Cerebral venous thrombosis in COVID-  
13 19-associated coagulopathy: A case report. *J Clin Neurosci* 2020;**79**:30–2.  
14 doi:10.1016/j.jocn.2020.07.038  
15  
16 18 Chiu D, Weinberger J. Cerebral Venous Sinus Thrombosis and Acute Myocardial  
17 Infarction in a Patient with PAI-1 4G/4G Homozygosity. *J Stroke Cerebrovasc Dis*  
18 2020;**29**:105250. doi:10.1016/j.jstrokecerebrovasdis.2020.105250  
19  
20 19 Bolaji P, Kukoyi B, Ahmad N, *et al.* Extensive cerebral venous sinus thrombosis: a  
21 potential complication in a patient with COVID-19 disease. *BMJ Case Rep*  
22 2020;**13**:e236820. doi:10.1136/bcr-2020-236820  
23  
24 20 Huang Q, Chai X, Xiao C, *et al.* A case report of oral contraceptive misuse  
25 induced cerebral venous sinus thrombosis and dural arteriovenous fistula.  
26 *Medicine (Baltimore)* 2019;**98**:e16440. doi:10.1097/MD.0000000000016440  
27  
28 21 Hu Y, Tang Z, Zhu W, *et al.* Clinical Reasoning: A teenager with persistent  
29 headache. *Neurology* 2019;**92**:e1526–31. doi:10.1212/WNL.0000000000007184  
30  
31 22 Yasushi S. Successful Treatment of Cerebral Sinus Thrombosis with Edoxaban  
32 Alone. *Int J Crit Care Emerg Med* 2017;**3**. doi:10.23937/2474-3674/1510029  
33  
34 23 Sui J, Zhang Y, Yang L, *et al.* Successful treatment with rivaroxaban of cerebral  
35 venous thrombosis and bone marrow necrosis induced by pegaspargase: A case  
36 report and literature review. *Medicine (Baltimore)* 2017;**96**:e8715.  
37 doi:10.1097/MD.0000000000008715  
38  
39 24 Becerra AF, Amuchastegui T, Tabares AH. Decreased Rivaroxaban Levels in a  
40 Patient with Cerebral Vein Thrombosis Receiving Phenytoin. *Case Rep Hematol*  
41 2017;**2017**:1–3. doi:10.1155/2017/4760612  
42  
43 25 Budhram A, Shettar B, Lee DH, *et al.* Bilateral Cavernous Sinus Thrombosis in  
44 Lemierre’s Syndrome. *Can J Neurol Sci / J Can des Sci Neurol* 2017;**44**:424–6.  
45 doi:10.1017/cjn.2016.438  
46  
47 26 Hsu Y, Juan C, Le J, *et al.* Anti-N-methyl-D-aspartate-receptor encephalitis  
48 complicated with antiphospholipid syndrome and cerebral venous thrombosis. *J*  
49 *Clin Rheumatol* 2017;**23**:294–5. doi:10.1186/2047-2994-1-19.  
50  
51 27 Inche Mat LN, Wan Sulaiman WA, Hoo FK, *et al.* A rare case of vein of Galen  
52 thrombosis: Exploring a potential role for novel oral anticoagulants (NOACs) in  
53 cerebral deep vein thrombosis. *Rawal Med. J.* 2017;**42**:432–4.  
54  
55 28 Rao SK, Ibrahim M, Hanni CM, *et al.* Apixaban for the treatment of cerebral  
56 venous thrombosis: A case series. *J Neurol Sci* 2017;**381**:318–20.  
57 doi:10.1016/j.jns.2017.09.007  
58  
59 29 Talamo L, Douvas M, Macik BG, *et al.* Successful treatment with apixaban of  
60 sinus venous thrombosis due to pegylated asparaginase in a young adult with T  
cell acute lymphoblastic leukemia: case report and review of management. *Ann*  
*Hematol* 2017;**96**:691–3. doi:10.1007/s00277-017-2930-0

- 1  
2  
3 30 Cho Y, Chae MK, Cha JM, *et al.* Cerebral venous thrombosis in a patient with  
4 Crohn's disease. *Intest Res* 2016;**14**:96. doi:10.5217/ir.2016.14.1.96  
5  
6 31 Micieli JA, Derkatch S, Pereira VM, *et al.* Development of dural arteriovenous  
7 fistulas after cerebral venous sinus thrombosis. *J Neuro-Ophthalmology*  
8 2016;**36**:53–7. doi:10.1097/WNO.0000000000000288  
9  
10 32 Mutgi SA, Grose NA, Behrouz R. Rivaroxaban for the treatment of cerebral  
11 venous thrombosis. *Int J Stroke* 2015;**10**:167–8. doi:10.1111/ij.s.12592  
12  
13 33 Sugie M, Iizuka N, Shimizu Y, *et al.* Cerebral Venous Thromboembolism in  
14 Antiphospholipid Syndrome Successfully Treated with the Combined Use of an  
15 Anti-Xa Inhibitor and Corticosteroid. *Intern Med* 2015;**54**:3051–6.  
16 doi:10.2169/internalmedicine.54.5045  
17  
18 34 Mathew T, Lobo A, Kukkuta Sarma G, *et al.* A case of post varicella cortical  
19 venous thrombosis successfully treated with dabigatran. *Neurol India* 2013;**61**:531.  
20 doi:10.4103/0028-3886.121939  
21  
22 35 Hon SFK, Li HLT, Cheng PW. Use of direct thrombin inhibitor for treatment of  
23 cerebral venous thrombosis. *J Stroke Cerebrovasc Dis* 2012;**21**:915.e11-915.e15.  
24 doi:10.1016/j.jstrokecerebrovasdis.2012.02.004  
25  
26  
27  
28  
29  
30  
31  
32  
33  
34  
35  
36  
37  
38  
39  
40  
41  
42  
43  
44  
45  
46  
47  
48  
49  
50  
51  
52  
53  
54  
55  
56  
57  
58  
59  
60

Bose G, et al. *Direct oral anticoagulants in treatment of cerebral venous thrombosis: systematic review. PRISMA Checklist*

1  
2  
3  
4  
5  
6  
7  
8  
9  
10  
11  
12  
13  
14  
15  
16  
17  
18  
19  
20  
21  
22  
23  
24  
25  
26  
27  
28  
29  
30  
31  
32  
33  
34  
35  
36  
37  
38  
39  
40  
41  
42  
43  
44  
45  
46  
47

| Section/topic             | # | Checklist item                                                                                                                                                                                                                                                                                              | Reported on page # |
|---------------------------|---|-------------------------------------------------------------------------------------------------------------------------------------------------------------------------------------------------------------------------------------------------------------------------------------------------------------|--------------------|
| <b>TITLE</b>              |   |                                                                                                                                                                                                                                                                                                             |                    |
| Title                     | 1 | Identify the report as a systematic review, meta-analysis, or both.                                                                                                                                                                                                                                         | 1                  |
| <b>ABSTRACT</b>           |   |                                                                                                                                                                                                                                                                                                             |                    |
| Structured summary        | 2 | Provide a structured summary including, as applicable: background; objectives; data sources; study eligibility criteria, participants, and interventions; study appraisal and synthesis methods; results; limitations; conclusions and implications of key findings; systematic review registration number. | 2-3                |
| <b>INTRODUCTION</b>       |   |                                                                                                                                                                                                                                                                                                             |                    |
| Rationale                 | 3 | Describe the rationale for the review in the context of what is already known.                                                                                                                                                                                                                              | 4                  |
| Objectives                | 4 | Provide an explicit statement of questions being addressed with reference to participants, interventions, comparisons, outcomes, and study design (PICOS).                                                                                                                                                  | 5                  |
| <b>METHODS</b>            |   |                                                                                                                                                                                                                                                                                                             |                    |
| Protocol and registration | 5 | Indicate if a review protocol exists, if and where it can be accessed (e.g., Web address), and, if available, provide registration information including registration number.                                                                                                                               | 5                  |
| Eligibility criteria      | 6 | Specify study characteristics (e.g., PICOS, length of follow-up) and report characteristics (e.g., years considered, language, publication status) used as criteria for eligibility, giving rationale.                                                                                                      | 5                  |
| Information sources       | 7 | Describe all information sources (e.g., databases with dates of coverage, contact with study                                                                                                                                                                                                                | 5                  |

Bose G, et al. Direct oral anticoagulants in treatment of cerebral venous thrombosis: systematic review. PRISMA Checklist

|                                    |    |                                                                                                                                                                                                                        |            |
|------------------------------------|----|------------------------------------------------------------------------------------------------------------------------------------------------------------------------------------------------------------------------|------------|
|                                    |    | authors to identify additional studies) in the search and date last searched.                                                                                                                                          |            |
| Search                             | 8  | Present full electronic search strategy for at least one database, including any limits used, such that it could be repeated.                                                                                          | Appendix I |
| Study selection                    | 9  | State the process for selecting studies (i.e., screening, eligibility, included in systematic review, and, if applicable, included in the meta-analysis).                                                              | 5          |
| Data collection process            | 10 | Describe method of data extraction from reports (e.g., piloted forms, independently, in duplicate) and any processes for obtaining and confirming data from investigators.                                             | 5          |
| Data items                         | 11 | List and define all variables for which data were sought (e.g., PICOS, funding sources) and any assumptions and simplifications made.                                                                                  | 5 and 6    |
| Risk of bias in individual studies | 12 | Describe methods used for assessing risk of bias of individual studies (including specification of whether this was done at the study or outcome level), and how this information is to be used in any data synthesis. | 6          |
| Summary measures                   | 13 | State the principal summary measures (e.g., risk ratio, difference in means).                                                                                                                                          | 6          |
| Synthesis of results               | 14 | Describe the methods of handling data and combining results of studies, if done, including measures of consistency (e.g., $I^2$ ) for each meta-analysis.                                                              | 6 and 7    |

Bose G, et al. *Direct oral anticoagulants in treatment of cerebral venous thrombosis: systematic review. PRISMA Checklist*

| Section/topic                 | #  | Checklist item                                                                                                                                                                                           | Reported on page #    |
|-------------------------------|----|----------------------------------------------------------------------------------------------------------------------------------------------------------------------------------------------------------|-----------------------|
| Risk of bias across studies   | 15 | Specify any assessment of risk of bias that may affect the cumulative evidence (e.g., publication bias, selective reporting within studies).                                                             | 6 and Appendix II     |
| Additional analyses           | 16 | Describe methods of additional analyses (e.g., sensitivity or subgroup analyses, meta-regression), if done, indicating which were pre-specified.                                                         | n/a                   |
| <b>RESULTS</b>                |    |                                                                                                                                                                                                          |                       |
| Study selection               | 17 | Give numbers of studies screened, assessed for eligibility, and included in the review, with reasons for exclusions at each stage, ideally with a flow diagram.                                          | 7                     |
| Study characteristics         | 18 | For each study, present characteristics for which data were extracted (e.g., study size, PICOS, follow-up period) and provide the citations.                                                             | 7-12, table 1 and 2   |
| Risk of bias within studies   | 19 | Present data on risk of bias of each study and, if available, any outcome level assessment (see item 12).                                                                                                | 13 and Appendix II    |
| Results of individual studies | 20 | For all outcomes considered (benefits or harms), present, for each study: (a) simple summary data for each intervention group (b) effect estimates and confidence intervals, ideally with a forest plot. | 7-12, Figure 2-3, and |

Bose G, et al. *Direct oral anticoagulants in treatment of cerebral venous thrombosis: systematic review. PRISMA Checklist*

|                             |    |                                                                                                                                                                                                                                               |                         |
|-----------------------------|----|-----------------------------------------------------------------------------------------------------------------------------------------------------------------------------------------------------------------------------------------------|-------------------------|
|                             |    |                                                                                                                                                                                                                                               | supp.<br>Figure<br>s1-3 |
| Synthesis of results        | 21 | Present results of each meta-analysis done, including confidence intervals and measures of consistency.                                                                                                                                       | 10 and figures.         |
| Risk of bias across studies | 22 | Present results of any assessment of risk of bias across studies (see Item 15).                                                                                                                                                               | 11, Appendix II         |
| Additional analysis         | 23 | Give results of additional analyses, if done (e.g., sensitivity or subgroup analyses, meta-regression [see Item 16]).                                                                                                                         | n/a                     |
| <b>DISCUSSION</b>           |    |                                                                                                                                                                                                                                               |                         |
| Summary of evidence         | 24 | Summarize the main findings including the strength of evidence for each main outcome; consider their relevance to key groups (e.g., healthcare providers, users, and policy makers).                                                          | 12-16                   |
| Limitations                 | 25 | Discuss limitations at study and outcome level (e.g., risk of bias), and at review-level (e.g., incomplete retrieval of identified research, reporting bias).                                                                                 | 16-17                   |
| Conclusions                 | 26 | Provide a general interpretation of the results in the context of other evidence, and implications for future research.                                                                                                                       | 17-18                   |
| <b>FUNDING</b>              |    |                                                                                                                                                                                                                                               |                         |
| Funding                     | 27 | Describe sources of funding for the systematic review and other support (e.g., supply of data);<br>For peer review only - <a href="http://bmjopen.bmj.com/site/about/guidelines.xhtml">http://bmjopen.bmj.com/site/about/guidelines.xhtml</a> | 19                      |

1 Bose G, et al. Direct oral anticoagulants in treatment of cerebral venous thrombosis: systematic review. *PRISMA Checklist*

|   |  |                                            |  |
|---|--|--------------------------------------------|--|
| 2 |  | role of funders for the systematic review. |  |
| 3 |  |                                            |  |
| 4 |  |                                            |  |

5

6

7

8

9 *From:* Moher D, Liberati A, Tetzlaff J, Altman DG, The PRISMA Group (2009). Preferred Reporting Items for Systematic Reviews and Meta-

10

11 Analyses: The PRISMA Statement. PLoS Med 6(7): e1000097. doi:10.1371/journal.pmed1000097

12

13 For more information, visit: [www.prisma-statement.org](http://www.prisma-statement.org).

14

15

16

17

18

19

20

21

22

23

24

25

26

27

28

29

30

31

32

33

34

35

36

37

38

39

40

41

42

43

44

45

46

47

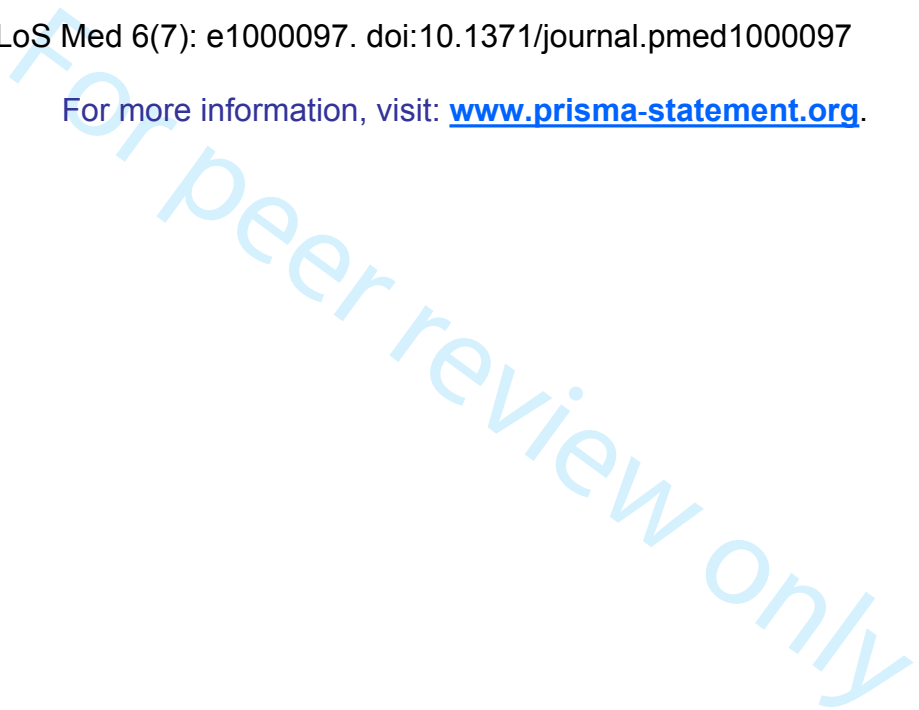

## Synthesis Without Meta-analysis (SWiM) reporting items

The citation for the Synthesis Without Meta-analysis explanation and elaboration article is: Campbell M, McKenzie JE, Sowden A, Katikireddi SV, Brennan SE, Ellis S, Hartmann-Boyce J, Ryan R, Shepperd S, Thomas J, Welch V, Thomson H. Synthesis without meta-analysis (SWiM) in systematic reviews: reporting guideline BMJ 2020;368:l6890 <http://dx.doi.org/10.1136/bmj.l6890>

| <b>SWiM is intended to complement and be used as an extension to PRISMA</b> |                                                                                                                                                                                                                                                                                                              |                                                                                                          |                                  |
|-----------------------------------------------------------------------------|--------------------------------------------------------------------------------------------------------------------------------------------------------------------------------------------------------------------------------------------------------------------------------------------------------------|----------------------------------------------------------------------------------------------------------|----------------------------------|
| <b>SWiM reporting item</b>                                                  | <b>Item description</b>                                                                                                                                                                                                                                                                                      | <b>Page in manuscript where item is reported</b>                                                         | <b>Other*</b>                    |
| <i>Methods</i>                                                              |                                                                                                                                                                                                                                                                                                              |                                                                                                          |                                  |
| <b>1</b> Grouping studies for synthesis                                     | 1a) Provide a description of, and rationale for, the groups used in the synthesis (e.g., groupings of populations, interventions, outcomes, study design)                                                                                                                                                    | 5 & 6                                                                                                    |                                  |
|                                                                             | 1b) Detail and provide rationale for any changes made subsequent to the protocol in the groups used in the synthesis                                                                                                                                                                                         | 5                                                                                                        | Protocol search date was updated |
| <b>2</b> Describe the standardised metric and transformation methods used   | Describe the standardised metric for each outcome. Explain why the metric(s) was chosen, and describe any methods used to transform the intervention effects, as reported in the study, to the standardised metric, citing any methodological guidance consulted                                             | 6 & 7                                                                                                    |                                  |
| <b>3</b> Describe the synthesis methods                                     | Describe and justify the methods used to synthesise the effects for each outcome when it was not possible to undertake a meta-analysis of effect estimates                                                                                                                                                   | 6 (risk of bias & pooling descriptive statistics)<br>14 (no meta-analysis comparison for DOAC treatment) |                                  |
| <b>4</b> Criteria used to prioritise results for                            | Where applicable, provide the criteria used, with supporting justification, to select the particular studies, or a particular study, for the main synthesis or to draw conclusions from the synthesis (e.g., based on study design, risk of bias assessments, directness in relation to the review question) | 5 search criteria<br>6 (risk of bias & pooling descriptive statistics)                                   |                                  |



### Synthesis Without Meta-analysis (SWiM) reporting items

|                                                             |                                                                                                                                                                                                                                                                                                           |                                                  |               |
|-------------------------------------------------------------|-----------------------------------------------------------------------------------------------------------------------------------------------------------------------------------------------------------------------------------------------------------------------------------------------------------|--------------------------------------------------|---------------|
| summary and synthesis                                       |                                                                                                                                                                                                                                                                                                           |                                                  |               |
| <b>SWiM reporting item</b>                                  | <b>Item description</b>                                                                                                                                                                                                                                                                                   | <b>Page in manuscript where item is reported</b> | <b>Other*</b> |
| <b>5</b> Investigation of heterogeneity in reported effects | State the method(s) used to examine heterogeneity in reported effects when it was not possible to undertake a meta-analysis of effect estimates and its extensions to investigate heterogeneity                                                                                                           | 6                                                |               |
| <b>6</b> Certainty of evidence                              | Describe the methods used to assess certainty of the synthesis findings                                                                                                                                                                                                                                   | 6                                                |               |
| <b>7</b> Data presentation methods                          | Describe the graphical and tabular methods used to present the effects (e.g., tables, forest plots, harvest plots).<br><br>Specify key study characteristics (e.g., study design, risk of bias) used to order the studies, in the text and any tables or graphs, clearly referencing the studies included | 6                                                |               |
| <i>Results</i>                                              |                                                                                                                                                                                                                                                                                                           |                                                  |               |
| <b>8</b> Reporting results                                  | For each comparison and outcome, provide a description of the synthesised findings, and the certainty of the findings. Describe the result in language that is consistent with the question the synthesis addresses, and indicate which studies contribute to the synthesis                               | 7-12                                             |               |
| <i>Discussion</i>                                           |                                                                                                                                                                                                                                                                                                           |                                                  |               |
| <b>9</b> Limitations of the synthesis                       | Report the limitations of the synthesis methods used and/or the groupings used in the synthesis, and how these affect the conclusions that can be drawn in relation to the original review question                                                                                                       | 16-17                                            |               |

PRISMA=Preferred Reporting Items for Systematic Reviews and Meta-Analyses.

## Synthesis Without Meta-analysis (SWiM) reporting items

\*If the information is not provided in the systematic review, give details of where this information is available (e.g., protocol, other published papers (provide citation details), or website (provide the URL)).

For peer review only
