# Supplementary material for: Direct oral anticoagulants in treatment of cerebral venous thrombosis: a systematic review
Source: PubMed Central journal article supplement — BMJ Open. 2021 Feb 16;11(2):e040212. doi: 10.1136/bmjopen-2020-040212 (PMC7888326; doi:10.1136/bmjopen-2020-040212), 2021-02-16
Supplement: bmjopen-2020-040212supp003.pdf [file bmjopen-2020-040212supp003.pdf]

## **SUPPLEMENTAL MATERIAL**

### Direct oral anticoagulants in treatment of cerebral venous thrombosis: systematic review

Gauruv Bose<sup>1</sup>, Justin Graveline<sup>1</sup>, Vignan Yogendrakumar<sup>1</sup>, Risa Shorr<sup>1</sup>, Dean Fergusson<sup>1</sup>, Gregoire Le Gal<sup>1</sup>, Jonathan M. Coutinho<sup>2</sup>, Marcelo Mendonça<sup>3</sup>, Miguel Viana-Baptista<sup>3</sup>, Simon Nagel<sup>4</sup>, and Dar Dowlatshahi<sup>1</sup>

1. Department of Medicine, University of Ottawa and The Ottawa Hospital Research Institute, Ottawa, Canada
2. Department of Neurology, University Medical Center, Amsterdam, Netherlands
3. Department of Neurology, Centro Hospitalar de Lisboa Ocidental, Lisbon, Portugal
4. Department of Neurology, University Hospital, University of Heidelberg, Heidelberg, Germany

### Appendix III: Risk of Bias Tables

**Table s1: Randomized Controlled Trials; Cochrane Risk of Bias Tool**

|                | Year | Random Sequence Generation                                                             | Allocation Concealment                                                 | Blinding of Participants                                                             | Blinding of Outcome Assessment                                                                     | Incomplete Outcome Data                                                                                                                                        | Selective Reporting                                                   | Other Bias                                                                        |
|----------------|------|----------------------------------------------------------------------------------------|------------------------------------------------------------------------|--------------------------------------------------------------------------------------|----------------------------------------------------------------------------------------------------|----------------------------------------------------------------------------------------------------------------------------------------------------------------|-----------------------------------------------------------------------|-----------------------------------------------------------------------------------|
| Ferro et al[3] | 2019 | <b>Low Risk:</b><br>Patients were randomized using an online 24-hour telephone service | <b>Low Risk:</b><br>Concealment maintained using the telephone service | <b>High Risk:</b><br>Patients and treating teams were aware of treatment allocation. | <b>Low Risk:</b><br>All outcomes were adjudicated in a blinded manner by an adjudication committee | <b>Low Risk:</b><br>All missing/excluded patients were disclosed by study authors. Reasons for exclusion were provided. 11 patients lost to follow-up overall. | <b>Low Risk</b><br>all outcomes that were pre-specified were reported | <b>Unclear</b><br>exploratory trial with no formal hypothesis statistical testing |

### Appendix III: Risk of Bias Tables

**Table s2: Observational Cohorts; NewCastle Ottawa Scale**

|                                                                               | Year | Selection<br>(Max☆☆☆☆)                         |                                                  |                              |                                        | Comparability<br>(Max☆☆)                      | Outcome<br>Max☆☆☆        |                                  |                                         |
|-------------------------------------------------------------------------------|------|------------------------------------------------|--------------------------------------------------|------------------------------|----------------------------------------|-----------------------------------------------|--------------------------|----------------------------------|-----------------------------------------|
|                                                                               |      | Representativeness<br>of the exposed<br>cohort | Selection<br>of the<br>non-<br>exposed<br>cohort | Ascertainment<br>of exposure | Outcome<br>absent at<br>study<br>start | Comparable<br>cohorts (design<br>or analysis) | Assessment<br>of outcome | Appropriate<br>follow-up<br>time | Adequate<br>follow-<br>up of<br>cohorts |
| Hsu et al.[4]                                                                 | 2020 | ☆                                              | ☆                                                | ☆                            | ☆                                      |                                               | ☆                        | ☆                                | ☆                                       |
| Powell et al.[5]                                                              | 2020 | ☆                                              | ☆                                                | ☆                            | ☆                                      |                                               | ☆                        | ☆                                | ☆                                       |
| Lurkin et al.[6]                                                              | 2019 | ☆                                              | ☆                                                | ☆                            | ☆                                      |                                               | ☆                        | ☆                                | ☆                                       |
| Wasay et al.[7]                                                               | 2019 | ☆                                              | ☆                                                | ☆                            | ☆                                      |                                               | ☆                        | ☆                                | ☆                                       |
| Herweh et al.[8] <sup>a</sup>                                                 | 2016 | ☆                                              | ☆                                                | ☆                            | ☆                                      |                                               | ☆                        | ☆                                | ☆                                       |
| A. Additional patient level information was provided upon request to authors. |      |                                                |                                                  |                              |                                        |                                               |                          |                                  |                                         |

### Appendix III: Risk of Bias Tables

**Table s3: Case Series; Johanna Briggs Institute Critical Appraisal for Case Series**

|                         | <b>Year</b> | <b>Clear Inclusion Criteria</b> | <b>Condition Measured in Reliable Way</b> | <b>Valid Method to ID condition</b> | <b>Consecutive Inclusion</b> | <b>Complete Inclusion</b> | <b>Demographics</b> | <b>Clinical Information</b> | <b>Outcomes</b> | <b>Presenting Site, Clinical Demographics</b> | <b>Stat Analysis</b> |
|-------------------------|-------------|---------------------------------|-------------------------------------------|-------------------------------------|------------------------------|---------------------------|---------------------|-----------------------------|-----------------|-----------------------------------------------|----------------------|
| Covut et al.[9]         | 2019        | Y                               | N                                         | N                                   | Y                            | Y                         | Y                   | Y                           | Y               | N                                             | N                    |
| Rusin et al.[10]        | 2019        | Y                               | Y                                         | Y                                   | Y                            | Y                         | Y                   | Y                           | Y               | Y                                             | N                    |
| Shankar Iyer et al.[11] | 2018        | Y                               | Unclear                                   | Unclear                             | Y                            | Y                         | Y                   | Y                           | Y               | N                                             | N                    |
| Cappellari et a[12]     | 2017        | Y                               | Unclear                                   | Unclear                             | Unclear                      | Unclear                   | Y                   | Y                           | Y               | N                                             | Y                    |
| Anticoli et al. [13]    | 2016        | Y                               | Y                                         | Y                                   | Y                            | Y                         | Y                   | Y                           | Y               | Y                                             | N                    |
| Mendonca et a[14]       | 2015        | Y                               | Y                                         | Y                                   | Y                            | Y                         | Y                   | Y                           | Y               | Y                                             | N                    |

## Appendix III: Risk of Bias Tables

Table s4: Case Reports; Johanna Briggs Institute Critical Appraisal

|                     | Year | Patient Demographics Clearly Described | Patient History Clearly Described | Clinical Condition Clearly Described | Diagnostic Tests Well Described | Intervention or Treatment Well Described | Post-Intervention Clinical Condition Described | Adverse Events | Takeaway Lesson? |
|---------------------|------|----------------------------------------|-----------------------------------|--------------------------------------|---------------------------------|------------------------------------------|------------------------------------------------|----------------|------------------|
| Bando et al[15]     | 2020 | Y                                      | Y                                 | Y                                    | Y                               | Y                                        | Y                                              | N              | Y                |
| Saito et al[16]     | 2020 | Y                                      | N                                 | Y                                    | Y                               | N                                        | Y                                              | N              | Y                |
| Sugiyama et al[17]  | 2020 | Y                                      | N                                 | Y                                    | Y                               | Y                                        | Y                                              | Y              | Y                |
| Chiu et al[18]      | 2020 | Y                                      | N                                 | Y                                    | Y                               | N                                        | Y                                              | Y              | Y                |
| Bolaji et al[19]    | 2020 | Y                                      | Y                                 | Y                                    | Y                               | N                                        | N                                              | N              | N                |
| Huang et al[20]     | 2019 | N                                      | Y                                 | Y                                    | Y                               | Y                                        | Y                                              | Y              | Y                |
| Hu et al[21]        | 2019 | Y                                      | Y                                 | Y                                    | Y                               | Y                                        | Y                                              | N              | Y                |
| Yasushi [22]        | 2017 | Y                                      | Y                                 | Y                                    | Y                               | Y                                        | Y                                              | N              | Y                |
| Sui et al[23]       | 2017 | N                                      | Y                                 | Y                                    | Y                               | Y                                        | Y                                              | N              | Y                |
| Becerra et al[24]   | 2017 | N                                      | Y                                 | Y                                    | Y                               | Y                                        | Y                                              | Y              | Y                |
| Budhram et al[25]   | 2017 | Y                                      | Y                                 | Y                                    | Y                               | Y                                        | N                                              | N              | Y                |
| Hsu et al[26]       | 2017 | N                                      | Y                                 | Y                                    | Y                               | Y                                        | Y                                              | N              | Y                |
| Inche Mat et al[27] | 2017 | Y                                      | N                                 | Y                                    | N                               | Y                                        | N                                              | N              | Y                |
| Rao et al[28]       | 2017 | N                                      | Y                                 | Y                                    | Y                               | Y                                        | Y                                              | N              | Y                |
| Talamo et al[29]    | 2017 | Y                                      | Y                                 | Y                                    | Y                               | Y                                        | Y                                              | N              | Y                |
| Cho et al[30]       | 2016 | Y                                      | Y                                 | Y                                    | Y                               | Y                                        | Y                                              | N              | Y                |
| Mieli et al[31]     | 2016 | Y                                      | Y                                 | N                                    | Y                               | N                                        | Y                                              | N              | N                |
| Mutgi et al[32]     | 2015 | N                                      | N                                 | N                                    | Y                               | N                                        | Y                                              | N              | Y                |
| Sugie et al[33]     | 2015 | Y                                      | Y                                 | Y                                    | Y                               | Y                                        | Y                                              | N              | Y                |
| Mathew et al[34]    | 2013 | N                                      | Y                                 | Y                                    | Y                               | Y                                        | Y                                              | N              | Y                |
| Hon et al[35]       | 2012 | Y                                      | Y                                 | Y                                    | Y                               | Y                                        | Y                                              | N              | Y                |

### Supplemental references

- 1 Bose G, Graveline J, Yogendrakumar V, et al Direct oral anticoagulants in treatment of cerebral venous thrombosis: a systematic review protocol. *Syst Rev* 2019;**8**:99. doi:10.1186/s13643-019-1022-8
- 2 Bose G, Graveline J, Dowlatshahi D. Systematic review of direct oral anticoagulants in treatment of cerebral venous thrombosis. *PROSPERO* 2017.
- 3 Ferro JM, Coutinho JM, Dentali F, et al Safety and Efficacy of Dabigatran Etxilate vs Dose-Adjusted Warfarin in Patients With Cerebral Venous Thrombosis. *JAMA Neurol* Published Online First: 3 September 2019. doi:10.1001/jamaneurol.2019.2764
- 4 Hsu A, Mistry H, Lala N, et al Preliminary findings regarding the use of direct oral anticoagulants in cerebral venous thrombosis. *Clin Neurol Neurosurg* 2020;**198**:106204. doi:10.1016/j.clineuro.2020.106204
- 5 Powell M, Tremolet de Villers K, Schwarz K, et al A Single-Center Retrospective Evaluation of the Use of Oral Factor Xa Inhibitors in Patients With Cerebral Venous Thrombosis. *Ann Pharmacother* 2020;:106002802095274. doi:10.1177/1060028020952749
- 6 Lurkin A, Derex L, Fambrini A, et al Direct Oral Anticoagulants for the Treatment of Cerebral Venous Thrombosis. *Cerebrovasc Dis* 2019;**48**:32–7. doi:10.1159/000502454
- 7 Wasay M, Khan M, Rajput HM, et al New Oral Anticoagulants versus Warfarin for Cerebral Venous Thrombosis: A Multi-Center, Observational Study. *J Stroke* 2019;**21**:220–3. doi:10.5853/jos.2019.00150
- 8 Herweh C, Griebe M, Geisbüsch C, et al Frequency and temporal profile of recanalization after cerebral vein and sinus thrombosis. *Eur J Neurol* 2016;**23**:681–7. doi:10.1111/ene.12901
- 9 Covut F, Kewan T, Perez O, et al Apixaban and rivaroxaban in patients with cerebral venous thrombosis. *Thromb Res* 2018;**173**:7–8. doi:10.1016/j.thromres.2018.11.018
- 10 Rusin G, Wypasek E, Papuga-Szela E, et al Direct oral anticoagulants in the treatment of cerebral venous sinus thrombosis: a single institution's experience. *Neurol Neurochir* 2019;**53**:384–387. doi:10.5603/PJNNS.a2019.0037
- 11 Shankar Iyer R, TCR R, Akhtar S, et al Is it safe to treat cerebral venous thrombosis with oral rivaroxaban without heparin? A preliminary study from 20 patients. *Clin Neurol Neurosurg* 2018;**175**:108–11. doi:10.1016/j.clineuro.2018.10.015
- 12 Cappellari M, Bovi P. Direct oral anticoagulants in patients with cervical artery dissection and cerebral venous thrombosis. A case series and review of the

- Successful Use of DOAC in the Treatment of Cerebral Venous Sinus Thrombosis (CVST): A Case Report. *J Stroke Cerebrovasc Dis*; **29**:105261. doi:10.1016/j.jstrokecerebrovasdis.2020.105261
- 16 Saito K, Ishii K, Furuta K, et al Recurrent Cerebral Venous Thrombosis Treated with Direct Oral Anticoagulants in a Japanese Man with Hereditary Protein C Deficiency. *J Stroke Cerebrovasc Dis*; **29**:105320. doi:10.1016/j.jstrokecerebrovasdis.2020.105320
- 17 Sugiyama Y, Tsuchiya T, Tanaka R, et al Cerebral venous thrombosis in COVID-19-associated coagulopathy: A case report. *J Clin Neurosci*; **2020**; **79**:30–2. doi:10.1016/j.jocn.2020.07.038
- 18 Chiu D, Weinberger J. Cerebral Venous Sinus Thrombosis and Acute Myocardial Infarction in a Patient with PAI-1 4G/4G Homozygosity. *J Stroke Cerebrovasc Dis* **2020**; **29**:105250. doi:10.1016/j.jstrokecerebrovasdis.2020.105250
- 19 Bolaji P, Kukoyi B, Ahmad N, et al Extensive cerebral venous sinus thrombosis: a potential complication in a patient with COVID-19 disease. *BMJ Case Rep* **2020**; **13**:e236820. doi:10.1136/bcr-2020-236820
- 20 Huang Q, Chai X, Xiao C, et al A case report of oral contraceptive misuse induced cerebral venous sinus thrombosis and dural arteriovenous fistula. *Medicine (Baltimore)*; **2019**; **98**:e16440. doi:10.1097/MD.00000000000016440
- 21 Hu Y, Tang Z, Zhu W, et al Clinical Reasoning: A teenager with persistent headache. *Neurology*; **2019**; **92**:e1526–31. doi:10.1212/WNL.00000000000007184
- 22 Yasushi S. Successful Treatment of Cerebral Sinus Thrombosis with Edoxaban Alone. *Int J Crit Care Emerg Med*; **2017**; **3**. doi:10.23937/2474-3674/1510029
- 23 Sui J, Zhang Y, Yang L, et al Successful treatment with rivaroxaban of cerebral venous thrombosis and bone marrow necrosis induced by pegaspargase: A case report and literature review. *Medicine (Baltimore)*; **2017**; **96**:e8715. doi:10.1097/MD.00000000000008715
- 24 Becerra AF, Amuchastegui T, Tabares AH. Decreased Rivaroxaban Levels in a Patient with Cerebral Vein Thrombosis Receiving Phenytoin. *Case Rep Hematol* **2017**; **2017**:3. doi:10.1155/2017/4760612
- 25 Budhram A, Shettar B, Lee DH, et al Bilateral Cavernous Sinus Thrombosis in Lemierre's Syndrome. *Can J Neurol Sci / J Can des Sci Neuro*; **2016**; **44**:424–6. doi:10.1017/cjn.2016.438
- 26 Hsu Y, Juan C, Le J, et al Anti-N-methyl-D-aspartate-receptor encephalitis complicated with antiphospholipid syndrome and cerebral venous thrombosis. *J Clin Rheumatol*; **2017**; **23**:294–5. doi:10.1186/2047-2994-1-19.
- 27 Inche Mat LN, Wan Sulaiman WA, Hoo FK, et al A rare case of vein of Galen thrombosis: Exploring a potential role for novel oral anticoagulants (NOACs) in cerebral deep vein thrombosis. *Rawal Med. J.* **2017**; **42**:432–4.

- 30 Cho Y, Chae MK, Cha JM, et al Cerebral venous thrombosis in a patient with Crohn's disease. *Intest Res* 2016;**14**:96. doi:10.5217/ir.2016.14.1.96
- 31 Micieli JA, Derkatch S, Pereira VM, et al Development of dural arteriovenous fistulas after cerebral venous sinus thrombosis. *J Neuro-Ophthalmology* 2016;**36**:53–7. doi:10.1097/WNO.0000000000000288
- 32 Mutgi SA, Grose NA, Behrouz R. Rivaroxaban for the treatment of cerebral venous thrombosis. *Int J Stroke* 2015;**10**:167–8. doi:10.1111/ijs.12592
- 33 Sugie M, Iizuka N, Shimizu Y, et al Cerebral Venous Thromboembolism in Antiphospholipid Syndrome Successfully Treated with the Combined Use of an Anti-Xa Inhibitor and Corticosteroid. *Intern Med* 2015;**54**:3051–6. doi:10.2169/internalmedicine.54.5045
- 34 Mathew T, Lobo A, Kukkuta Sarma G, et al A case of post varicella cortical venous thrombosis successfully treated with dabigatran. *Neurol India* 2013;**61**:531. doi:10.4103/0028-3886.121939
- 35 Hon SFK, Li HLT, Cheng PW. Use of direct thrombin inhibitor for treatment of cerebral venous thrombosis. *J Stroke Cerebrovasc Dis* 2012;**21**:915.e11-915.e15. doi:10.1016/j.jstrokecerebrovasdis.2012.02.004
